# Supplementary material for: A glimpse into the future: modelling global prevalence of hypertension
Source: Springer Nature journal article supplement (doi:10.1186/s12889-023-16662-z), 2023-10-03
Supplement: 12889_2023_16662_MOESM1_ESM.pdf [file 12889_2023_16662_MOESM1_ESM.pdf]

***Supplementary material***

**A glimpse into the future: modelling global prevalence of hypertension**

**Contents**

|                                                                                                             |    |
|-------------------------------------------------------------------------------------------------------------|----|
| Table A1. Projected hypertension prevalence for 2040 (Male)                                                 | 2  |
| Table A2. Projected hypertension prevalence for 2040 (Female)                                               | 5  |
| Table A3. Projected hypertension prevalence for 2040 (Both)                                                 | 8  |
| Fig. A1a – A1h. Plot of actual data (dotted) and fitted curve (95% CI) for hypertension prevalence (Male)   | 12 |
| Fig. A2a – A2h. Plot of actual data (dotted) and fitted curve (95% CI) for hypertension prevalence (Female) | 20 |
| Fig. A3a – A3h. Plot of actual data (dotted) and fitted curve (95% CI) for hypertension prevalence (Both)   | 28 |
| Fig. A4a. Plot of actual data and fitted curve (95% CI) for hypertension prevalence (Income groups)         | 36 |
| Fig. A4b. Plot of actual data and fitted curve (95% CI) for hypertension prevalence (Regions)               | 37 |
| Table A4. Changes in hypertension prevalence cluster patterns                                               | 38 |

**Table A1.** Projected hypertension prevalence for 2040 (Male).

| No. | Country                               | 2015 <sup>a</sup> | 2040 <sup>a</sup> | $\Delta\%$ <sup>b</sup> | L <sup>c</sup> | U <sup>c</sup> |
|-----|---------------------------------------|-------------------|-------------------|-------------------------|----------------|----------------|
| 1   | Croatia                               | 38.4              | 41.1              | 7.1                     | 36.8           | 45.4           |
| 2   | Trinidad and Tobago                   | 27.6              | 40.8              | 47.8                    | 40.5           | 41.1           |
| 3   | Uganda                                | 26.7              | 37.5              | 40.3                    | 37.3           | 37.7           |
| 4   | Bosnia and Herzegovina                | 34                | 37.1              | 9.1                     | 33.7           | 40.3           |
| 5   | Moldova                               | 33.6              | 34.8              | 3.6                     | 31.1           | 38.5           |
| 6   | Pakistan                              | 31.5              | 34.6              | 9.7                     | 33.3           | 35.7           |
| 7   | Romania                               | 34.7              | 33.1              | -4.7                    | 28.9           | 37.1           |
| 8   | Nepal                                 | 29.7              | 33.0              | 11.0                    | 31.6           | 34.4           |
| 9   | Burundi                               | 27.3              | 32.2              | 17.9                    | 30.4           | 33.8           |
| 10  | Kazakhstan                            | 30.4              | 31.8              | 4.8                     | 28.7           | 34.7           |
| 11  | Ethiopia                              | 28.8              | 31.8              | 10.6                    | 30.2           | 33.3           |
| 12  | Saint Lucia                           | 29.9              | 31.7              | 6.0                     | 29.3           | 34.1           |
| 13  | Slovenia                              | 35.8              | 31.6              | -11.7                   | 27.9           | 35.4           |
| 14  | Yemen                                 | 29.9              | 31.5              | 5.2                     | 28.4           | 34.2           |
| 15  | Lithuania                             | 36.1              | 31.4              | -13.1                   | 26.3           | 37.0           |
| 16  | Mali                                  | 31.2              | 31.2              | 0.1                     | 28.9           | 33.3           |
| 17  | Somalia                               | 33.5              | 31.1              | -7.1                    | 27.4           | 34.7           |
| 18  | Afghanistan                           | 30.4              | 31.1              | 2.3                     | 29.0           | 33.3           |
| 19  | Sudan                                 | 30.6              | 30.8              | 0.8                     | 28.7           | 32.8           |
| 20  | Malawi                                | 27.8              | 30.7              | 10.4                    | 29.0           | 32.4           |
| 21  | Albania                               | 33                | 30.7              | -7.1                    | 28.4           | 33.2           |
| 22  | Central African Republic              | 31.4              | 30.5              | -2.9                    | 28.7           | 32.3           |
| 23  | Chad                                  | 31.6              | 30.4              | -3.9                    | 27.9           | 32.8           |
| 24  | Vanuatu                               | 24.2              | 30.3              | 25.2                    | 30.1           | 30.4           |
| 25  | Eritrea                               | 28.2              | 30.2              | 7.2                     | 29.1           | 31.5           |
| 26  | Micronesia                            | 26.6              | 29.8              | 12.0                    | 27.9           | 31.6           |
| 27  | Burkina Faso                          | 31.3              | 29.8              | -4.9                    | 27.4           | 32.0           |
| 28  | Comoros                               | 27.4              | 29.4              | 7.4                     | 28.1           | 30.8           |
| 29  | Bhutan                                | 28.5              | 29.4              | 3.2                     | 28.3           | 30.5           |
| 30  | Papua New Guinea                      | 25.1              | 29.2              | 16.4                    | 28.3           | 30.1           |
| 31  | Macedonia                             | 32.7              | 29.2              | -10.8                   | 26.9           | 31.5           |
| 32  | Niger                                 | 31.3              | 29.1              | -7.0                    | 26.9           | 31.3           |
| 33  | Cambodia                              | 26.3              | 29.0              | 10.4                    | 27.1           | 30.8           |
| 34  | Poland                                | 34.6              | 29.0              | -16.2                   | 25.6           | 33.1           |
| 35  | Montenegro                            | 34.4              | 28.9              | -16.1                   | 24.5           | 33.4           |
| 36  | Tajikistan                            | 26.4              | 28.8              | 9.1                     | 27.1           | 30.7           |
| 37  | Slovakia                              | 34.3              | 28.7              | -16.3                   | 26.4           | 31.2           |
| 38  | Antigua and Barbuda                   | 26.4              | 28.6              | 8.3                     | 25.8           | 31.4           |
| 39  | Tanzania                              | 26.6              | 28.5              | 7.1                     | 27.5           | 29.4           |
| 40  | Bulgaria                              | 33.6              | 28.4              | -15.6                   | 24.1           | 33.1           |
| 41  | Czechia                               | 34.4              | 28.2              | -17.9                   | 24.6           | 32.5           |
| 42  | Hungary                               | 36.1              | 28.2              | -21.8                   | 26.0           | 30.8           |
| 43  | Estonia                               | 34.3              | 28.2              | -17.8                   | 24.9           | 32.0           |
| 44  | Myanmar                               | 24.9              | 28.1              | 12.9                    | 27.9           | 28.3           |
| 45  | India                                 | 26.6              | 28.1              | 5.6                     | 27.3           | 28.9           |
| 46  | Equatorial Guinea                     | 29.2              | 28.1              | -3.9                    | 25.2           | 31.1           |
| 47  | Congo, the Democratic Republic of the | 29.3              | 28.0              | -4.4                    | 26.1           | 30.1           |
| 48  | Guinea                                | 29                | 27.9              | -3.8                    | 26.3           | 29.4           |
| 49  | Viet Nam                              | 25                | 27.8              | 11.2                    | 26.7           | 28.8           |
| 50  | Kenya                                 | 26.5              | 27.6              | 4.2                     | 25.6           | 29.6           |
| 51  | Ukraine                               | 32.3              | 27.5              | -14.9                   | 24.9           | 30.3           |
| 52  | Angola                                | 29.6              | 27.3              | -7.8                    | 25.2           | 29.1           |
| 53  | Kyrgyzstan                            | 27.4              | 27.3              | -0.5                    | 26.2           | 28.3           |
| 54  | Grenada                               | 26.8              | 27.1              | 1.1                     | 25.4           | 28.9           |
| 55  | Russian Federation                    | 32.6              | 27.1              | -17.0                   | 24.5           | 30.9           |
| 56  | Saint Kitts and Nevis                 | 27.9              | 27.0              | -3.1                    | 24.3           | 29.8           |
| 57  | Uzbekistan                            | 26.5              | 27.0              | 1.9                     | 24.6           | 29.4           |
| 58  | Niue                                  | 26.1              | 26.9              | 3.0                     | 26.0           | 27.7           |

*A glimpse into the future: modelling global prevalence of hypertension*

| <b>No.</b> | <b>Country</b>                   | <b>2015<sup>a</sup></b> | <b>2040<sup>a</sup></b> | <b>Δ%<sup>b</sup></b> | <b>L<sup>c</sup></b> | <b>U<sup>c</sup></b> |
|------------|----------------------------------|-------------------------|-------------------------|-----------------------|----------------------|----------------------|
| 59         | Mozambique                       | 28.1                    | 26.9                    | -4.4                  | 24.6                 | 29.0                 |
| 60         | Madagascar                       | 27.8                    | 26.9                    | -3.3                  | 25.2                 | 28.6                 |
| 61         | Guinea-Bissau                    | 29.7                    | 26.7                    | -10.2                 | 24.7                 | 28.5                 |
| 62         | Maldives                         | 26.9                    | 26.7                    | -0.9                  | 24.6                 | 28.7                 |
| 63         | Timor-Leste                      | 26.9                    | 26.6                    | -1.0                  | 24.2                 | 29.0                 |
| 64         | Armenia                          | 27.8                    | 26.6                    | -4.4                  | 24.2                 | 29.2                 |
| 65         | Mongolia                         | 32.3                    | 26.3                    | -18.7                 | 23.8                 | 29.1                 |
| 66         | Serbia                           | 33.8                    | 25.8                    | -23.6                 | 21.7                 | 29.8                 |
| 67         | Belarus                          | 33                      | 25.7                    | -22.2                 | 23.9                 | 28.4                 |
| 68         | Turkmenistan                     | 26.6                    | 25.6                    | -3.7                  | 24.3                 | 27.0                 |
| 69         | Rwanda                           | 25.2                    | 25.6                    | 1.6                   | 22.2                 | 28.8                 |
| 70         | Botswana                         | 29.3                    | 25.2                    | -13.9                 | 19.5                 | 31.5                 |
| 71         | Barbados                         | 27                      | 25.2                    | -6.8                  | 21.2                 | 28.9                 |
| 72         | Eswatini                         | 28.1                    | 25.2                    | -10.4                 | 22.2                 | 28.0                 |
| 73         | Tuvalu                           | 26.1                    | 25.1                    | -3.7                  | 23.7                 | 26.5                 |
| 74         | Lesotho                          | 26.1                    | 24.7                    | -5.2                  | 23.0                 | 26.7                 |
| 75         | Sierra Leone                     | 29.4                    | 24.5                    | -16.5                 | 22.0                 | 27.7                 |
| 76         | Azerbaijan                       | 25.8                    | 24.5                    | -4.9                  | 23.3                 | 25.8                 |
| 77         | Thailand                         | 24.2                    | 24.3                    | 0.5                   | 22.4                 | 26.3                 |
| 78         | Sri Lanka                        | 23                      | 24.3                    | 5.5                   | 22.4                 | 26.2                 |
| 79         | Kiribati                         | 24                      | 24.2                    | 0.9                   | 23.0                 | 25.4                 |
| 80         | Mauritania                       | 31.8                    | 24.2                    | -24.0                 | 19.4                 | 28.7                 |
| 81         | Togo                             | 28.3                    | 24.1                    | -14.7                 | 21.8                 | 26.5                 |
| 82         | Mauritius                        | 26.5                    | 24.1                    | -9.0                  | 22.4                 | 25.8                 |
| 83         | Senegal                          | 29.7                    | 24.1                    | -19.0                 | 21.1                 | 27.6                 |
| 84         | Morocco                          | 26.2                    | 23.8                    | -9.2                  | 20.0                 | 39.1                 |
| 85         | Liberia                          | 28.2                    | 23.6                    | -16.3                 | 19.7                 | 27.7                 |
| 86         | Namibia                          | 28.2                    | 23.5                    | -16.6                 | 22.0                 | 25.2                 |
| 87         | Zimbabwe                         | 26.9                    | 23.5                    | -12.7                 | 21.8                 | 25.3                 |
| 88         | Gambia                           | 29.6                    | 23.2                    | -21.7                 | 20.0                 | 26.2                 |
| 89         | Lao People's Democratic Republic | 24.5                    | 23.1                    | -5.7                  | 21.3                 | 24.9                 |
| 90         | Congo                            | 27.5                    | 22.9                    | -16.6                 | 20.0                 | 26.2                 |
| 91         | Argentina                        | 27.6                    | 22.7                    | -17.6                 | 22.4                 | 23.2                 |
| 92         | Philippines                      | 24.1                    | 22.7                    | -5.8                  | 21.2                 | 24.2                 |
| 93         | Cabo Verde                       | 30.5                    | 22.7                    | -25.7                 | 19.0                 | 26.8                 |
| 94         | Cote D'ivoire                    | 27.8                    | 22.5                    | -19.2                 | 19.4                 | 26.1                 |
| 95         | Saint Vincent and the Grenadines | 25.9                    | 22.4                    | -13.3                 | 20.6                 | 24.2                 |
| 96         | Egypt                            | 24.8                    | 22.4                    | -9.7                  | 20.5                 | 24.3                 |
| 97         | South Africa                     | 27.4                    | 22.2                    | -18.8                 | 20.7                 | 24.1                 |
| 98         | Haiti                            | 25.2                    | 22.2                    | -12.1                 | 20.7                 | 23.7                 |
| 99         | Bangladesh                       | 24.5                    | 22.0                    | -10.4                 | 19.6                 | 24.3                 |
| 100        | Palau                            | 25.7                    | 21.9                    | -15.0                 | 20.7                 | 23.1                 |
| 101        | Solomon Islands                  | 20.4                    | 21.4                    | 5.1                   | 19.8                 | 23.0                 |
| 102        | Guatemala                        | 22                      | 21.4                    | -2.8                  | 21.2                 | 21.5                 |
| 103        | Iraq                             | 25.6                    | 21.4                    | -16.6                 | 19.4                 | 23.4                 |
| 104        | Seychelles                       | 26.4                    | 21.3                    | -19.5                 | 18.7                 | 24.1                 |
| 105        | Indonesia                        | 24.3                    | 21.2                    | -12.6                 | 19.1                 | 23.3                 |
| 106        | Jamaica                          | 24.5                    | 21.1                    | -14.0                 | 18.3                 | 23.8                 |
| 107        | Honduras                         | 22.6                    | 21.0                    | -6.9                  | 19.5                 | 22.7                 |
| 108        | Marshall Islands                 | 23.8                    | 20.9                    | -12.2                 | 19.0                 | 23.1                 |
| 109        | Djibouti                         | 28                      | 20.6                    | -26.3                 | 18.6                 | 23.0                 |
| 110        | Fiji                             | 22.4                    | 20.5                    | -8.4                  | 18.1                 | 23.1                 |
| 111        | Cook Islands                     | 24.9                    | 20.2                    | -18.9                 | 18.9                 | 21.4                 |
| 112        | Belize                           | 24.4                    | 20.1                    | -17.6                 | 17.9                 | 22.5                 |
| 113        | Brazil                           | 26.7                    | 19.8                    | -26.0                 | 18.0                 | 21.7                 |
| 114        | Benin                            | 27.1                    | 19.7                    | -27.3                 | 16.5                 | 23.5                 |
| 115        | Syrian Arab Republic             | 25.1                    | 19.6                    | -22.0                 | 17.1                 | 22.1                 |
| 116        | Chile                            | 25.4                    | 19.5                    | -23.3                 | 18.6                 | 20.4                 |
| 117        | Nauru                            | 23.8                    | 19.3                    | -19.0                 | 19.1                 | 19.5                 |

| <b>No.</b> | <b>Country</b>             | <b>2015<sup>a</sup></b> | <b>2040<sup>a</sup></b> | <b>Δ%<sup>b</sup></b> | <b>L<sup>c</sup></b> | <b>U<sup>c</sup></b> |
|------------|----------------------------|-------------------------|-------------------------|-----------------------|----------------------|----------------------|
| 118        | Dominica                   | 25.7                    | 19.3                    | -25.1                 | 17.2                 | 21.4                 |
| 119        | Suriname                   | 24.6                    | 19.2                    | -21.9                 | 15.6                 | 22.9                 |
| 120        | Panama                     | 22.3                    | 19.1                    | -14.5                 | 17.9                 | 20.1                 |
| 121        | Algeria                    | 25.4                    | 19.1                    | -24.9                 | 16.6                 | 21.6                 |
| 122        | Libya                      | 25.2                    | 19.1                    | -24.3                 | 13.8                 | 25.1                 |
| 123        | Mexico                     | 22.3                    | 18.8                    | -15.9                 | 16.9                 | 20.8                 |
| 124        | Portugal                   | 29.3                    | 18.6                    | -36.4                 | 15.0                 | 22.6                 |
| 125        | Malaysia                   | 25.3                    | 18.5                    | -26.7                 | 15.0                 | 22.3                 |
| 126        | China                      | 21.5                    | 18.5                    | -13.8                 | 15.9                 | 21.4                 |
| 127        | Nicaragua                  | 21.6                    | 18.3                    | -15.2                 | 16.3                 | 20.8                 |
| 128        | Bahamas                    | 25.2                    | 18.3                    | -27.5                 | 16.5                 | 20.3                 |
| 129        | Sao Tome and Principe      | 26.9                    | 18.2                    | -32.4                 | 15.5                 | 21.1                 |
| 130        | Korea (North)              | 19.1                    | 18.1                    | -5.3                  | 18.0                 | 18.2                 |
| 131        | Oman                       | 25.7                    | 18.0                    | -29.8                 | 14.9                 | 21.4                 |
| 132        | Tunisia                    | 23.8                    | 17.9                    | -24.7                 | 16.9                 | 18.9                 |
| 133        | Ecuador                    | 19.8                    | 17.8                    | -9.9                  | 15.7                 | 20.1                 |
| 134        | Ghana                      | 24.6                    | 17.2                    | -30.2                 | 14.7                 | 19.8                 |
| 135        | Jordan                     | 23.1                    | 17.1                    | -25.9                 | 15.8                 | 18.7                 |
| 136        | Belgium                    | 22.4                    | 17.0                    | -24.2                 | 16.4                 | 17.7                 |
| 137        | Dominican Republic         | 23.8                    | 16.8                    | -29.3                 | 12.7                 | 21.4                 |
| 138        | Saudi Arabia               | 24.7                    | 16.8                    | -32.0                 | 13.6                 | 20.1                 |
| 139        | Cameroon                   | 24.9                    | 16.7                    | -33.0                 | 13.8                 | 19.7                 |
| 140        | Austria                    | 25.2                    | 16.7                    | -33.8                 | 15.7                 | 17.8                 |
| 141        | Luxembourg                 | 27.8                    | 16.6                    | -40.2                 | 13.6                 | 21.8                 |
| 142        | El Salvador                | 20.4                    | 16.6                    | -18.8                 | 15.3                 | 17.9                 |
| 143        | Colombia                   | 21.5                    | 16.5                    | -23.3                 | 15.5                 | 17.5                 |
| 144        | Bolivia                    | 19.7                    | 16.4                    | -16.7                 | 13.3                 | 20.2                 |
| 145        | Iceland                    | 26.2                    | 16.3                    | -37.9                 | 13.0                 | 20.3                 |
| 146        | Brunei Darussalam          | 22                      | 16.3                    | -26.1                 | 14.4                 | 18.2                 |
| 147        | Finland                    | 24                      | 16.2                    | -32.4                 | 15.4                 | 17.4                 |
| 148        | Costa Rica                 | 21                      | 16.0                    | -23.6                 | 13.9                 | 18.0                 |
| 149        | Japan                      | 22.5                    | 16.0                    | -29.1                 | 15.0                 | 17.0                 |
| 150        | Greece                     | 22.8                    | 15.8                    | -30.5                 | 14.3                 | 17.5                 |
| 151        | Switzerland                | 22.3                    | 15.4                    | -31.1                 | 11.9                 | 19.2                 |
| 152        | Kuwait                     | 25.5                    | 15.2                    | -40.3                 | 11.4                 | 21.3                 |
| 153        | Uruguay                    | 24.7                    | 14.8                    | -39.9                 | 13.8                 | 16.2                 |
| 154        | Cyprus                     | 23.9                    | 14.8                    | -38.1                 | 11.6                 | 18.8                 |
| 155        | Germany                    | 24.3                    | 14.7                    | -39.6                 | 13.5                 | 16.0                 |
| 156        | Bahrain                    | 22.5                    | 14.6                    | -35.0                 | 13.6                 | 15.8                 |
| 157        | Venezuela                  | 21.5                    | 14.5                    | -32.4                 | 13.4                 | 15.9                 |
| 158        | Andorra                    | 23.2                    | 14.4                    | -37.9                 | 13.2                 | 16.0                 |
| 159        | Cuba                       | 20.9                    | 13.9                    | -33.4                 | 10.8                 | 17.6                 |
| 160        | France                     | 27.7                    | 13.7                    | -50.6                 | 11.1                 | 16.5                 |
| 161        | Qatar                      | 23                      | 13.5                    | -41.3                 | 12.8                 | 14.2                 |
| 162        | Malta                      | 24.3                    | 13.3                    | -45.5                 | 11.5                 | 15.1                 |
| 163        | Nigeria                    | 22.7                    | 13.0                    | -42.7                 | 9.0                  | 17.8                 |
| 164        | Norway                     | 24.6                    | 12.9                    | -47.6                 | 10.9                 | 14.9                 |
| 165        | United States              | 15.3                    | 12.8                    | -16.6                 | 11.9                 | 13.8                 |
| 166        | Iran (Islamic Republic of) | 20.4                    | 12.7                    | -37.8                 | 10.8                 | 14.8                 |
| 167        | Italy                      | 25.2                    | 12.5                    | -50.5                 | 10.2                 | 15.3                 |
| 168        | New Zealand                | 19.3                    | 12.2                    | -36.9                 | 10.5                 | 14.1                 |
| 169        | Israel                     | 20.6                    | 12.1                    | -41.1                 | 11.3                 | 13.1                 |
| 170        | Turkey                     | 20.3                    | 12.0                    | -40.7                 | 9.0                  | 15.6                 |
| 171        | Peru                       | 16.1                    | 12.0                    | -25.5                 | 11.6                 | 12.4                 |
| 172        | Sweden                     | 24.1                    | 10.9                    | -54.9                 | 10.0                 | 11.8                 |
| 173        | Denmark                    | 26.5                    | 10.5                    | -60.3                 | 6.6                  | 15.0                 |
| 174        | Netherlands                | 23.1                    | 10.1                    | -56.4                 | 8.7                  | 11.6                 |
| 175        | Spain                      | 23.5                    | 9.7                     | -58.7                 | 7.3                  | 12.5                 |
| 176        | Ireland                    | 22.8                    | 8.4                     | -63.0                 | 5.1                  | 13.7                 |

| No. | Country        | 2015 <sup>a</sup> | 2040 <sup>a</sup> | Δ% <sup>b</sup> | L <sup>c</sup> | U <sup>c</sup> |
|-----|----------------|-------------------|-------------------|-----------------|----------------|----------------|
| 177 | Singapore      | 17.8              | 7.9               | -55.9           | 5.8            | 10.5           |
| 178 | Australia      | 18                | 7.6               | -57.6           | 6.6            | 8.9            |
| 179 | Canada         | 15.6              | 7.3               | -53.3           | 6.6            | 8.0            |
| 180 | United Kingdom | 17.9              | 5.5               | -69.0           | 4.1            | 7.4            |

<sup>a</sup> Raised BP (SBP $\geq$ 140 OR DBP $\geq$ 90) (% , age-standardised estimate), 18+ years.

<sup>b</sup> Percentage change in hypertension prevalence from 2015 to 2040.

<sup>c</sup> Lower and upper confidence intervals (95%) for the 2040 forecast.

**Table A2.** Projected hypertension prevalence for 2040 (Female).

| No. | Country                               | 2015 <sup>a</sup> | 2040 <sup>a</sup> | Δ% <sup>b</sup> | L <sup>c</sup> | U <sup>c</sup> |
|-----|---------------------------------------|-------------------|-------------------|-----------------|----------------|----------------|
| 1   | Niger                                 | 35.8              | 38.7              | 8.2             | 38.4           | 39.0           |
| 2   | Chad                                  | 33.8              | 38.6              | 14.1            | 35.9           | 40.8           |
| 3   | Ethiopia                              | 31.7              | 38.1              | 20.2            | 37.3           | 38.8           |
| 4   | Burundi                               | 31.1              | 37.3              | 19.9            | 36.3           | 38.3           |
| 5   | Mali                                  | 33.6              | 34.9              | 4.0             | 32.8           | 36.9           |
| 6   | Burkina Faso                          | 33.2              | 34.7              | 4.6             | 32.7           | 36.8           |
| 7   | Malawi                                | 29.6              | 34.1              | 15.2            | 32.6           | 35.6           |
| 8   | Afghanistan                           | 30.7              | 33.5              | 9.1             | 32.8           | 34.2           |
| 9   | Uganda                                | 27.7              | 33.0              | 19.1            | 32.5           | 33.5           |
| 10  | Eritrea                               | 29.5              | 32.8              | 11.1            | 31.9           | 33.6           |
| 11  | Nepal                                 | 29.5              | 32.7              | 11.0            | 31.6           | 33.8           |
| 12  | Guinea                                | 31.4              | 32.6              | 3.7             | 30.8           | 34.4           |
| 13  | Lesotho                               | 30.8              | 32.5              | 5.4             | 31.1           | 33.9           |
| 14  | Somalia                               | 32.2              | 32.2              | 0.0             | 30.2           | 34.0           |
| 15  | Eswatini                              | 30.9              | 32.1              | 3.9             | 29.1           | 35.2           |
| 16  | Papua New Guinea                      | 25.8              | 32.0              | 24.2            | 31.1           | 33.0           |
| 17  | Mozambique                            | 29.7              | 31.8              | 7.2             | 29.4           | 34.0           |
| 18  | Comoros                               | 28.2              | 31.1              | 10.4            | 28.9           | 33.2           |
| 19  | Sudan                                 | 29.6              | 31.1              | 5.1             | 29.2           | 33.1           |
| 20  | Pakistan                              | 29.5              | 30.9              | 4.9             | 30.4           | 31.5           |
| 21  | Yemen                                 | 31.2              | 30.8              | -1.3            | 28.9           | 32.7           |
| 22  | Central African Republic              | 30.8              | 30.6              | -0.6            | 29.2           | 31.9           |
| 23  | Timor-Leste                           | 28.1              | 30.6              | 8.8             | 29.3           | 31.8           |
| 24  | Rwanda                                | 27.9              | 30.2              | 8.2             | 28.0           | 32.3           |
| 25  | Tanzania                              | 27.7              | 29.2              | 5.5             | 27.9           | 30.5           |
| 26  | Madagascar                            | 28.2              | 29.1              | 3.2             | 28.0           | 30.2           |
| 27  | Kenya                                 | 26.7              | 28.9              | 8.1             | 27.5           | 30.2           |
| 28  | Trinidad and Tobago                   | 23.9              | 28.4              | 18.8            | 26.8           | 29.7           |
| 29  | Guinea-Bissau                         | 30.7              | 28.3              | -7.7            | 25.4           | 31.0           |
| 30  | Senegal                               | 30.4              | 28.2              | -7.3            | 26.1           | 30.5           |
| 31  | Bhutan                                | 27.6              | 28.1              | 1.7             | 26.5           | 29.5           |
| 32  | Zimbabwe                              | 29.2              | 28.0              | -4.3            | 25.6           | 30.1           |
| 33  | Cambodia                              | 25.5              | 27.9              | 9.3             | 24.9           | 30.6           |
| 34  | Togo                                  | 29.2              | 27.7              | -5.2            | 25.7           | 29.6           |
| 35  | Solomon Islands                       | 23.6              | 27.5              | 16.5            | 26.7           | 28.2           |
| 36  | Micronesia                            | 23.2              | 27.5              | 18.4            | 25.9           | 29.0           |
| 37  | Tajikistan                            | 25.7              | 27.4              | 6.7             | 25.4           | 29.3           |
| 38  | Saint Lucia                           | 24.4              | 27.3              | 12.0            | 25.6           | 29.0           |
| 39  | Sierra Leone                          | 31                | 27.2              | -12.2           | 24.3           | 30.3           |
| 40  | Equatorial Guinea                     | 27.7              | 27.0              | -2.4            | 25.2           | 28.9           |
| 41  | Vanuatu                               | 24.1              | 26.8              | 11.3            | 25.7           | 28.2           |
| 42  | Angola                                | 29.6              | 26.8              | -9.6            | 24.5           | 29.3           |
| 43  | Tonga                                 | 21.8              | 26.6              | 22.1            | 24.7           | 28.5           |
| 44  | Congo, the Democratic Republic of the | 27.6              | 26.5              | -4.1            | 24.9           | 28.2           |
| 45  | Kyrgyzstan                            | 25.7              | 25.8              | 0.5             | 24.5           | 27.2           |
| 46  | India                                 | 24.7              | 25.5              | 3.2             | 24.7           | 26.2           |
| 47  | Bosnia and Herzegovina                | 27.6              | 25.4              | -8.0            | 22.4           | 28.6           |

| <b>No.</b> | <b>Country</b>                   | <b>2015<sup>a</sup></b> | <b>2040<sup>a</sup></b> | <b>Δ%<sup>b</sup></b> | <b>L<sup>c</sup></b> | <b>U<sup>c</sup></b> |
|------------|----------------------------------|-------------------------|-------------------------|-----------------------|----------------------|----------------------|
| 48         | Liberia                          | 28.3                    | 25.4                    | -10.3                 | 21.3                 | 30.1                 |
| 49         | Zambia                           | 26.5                    | 25.0                    | -5.6                  | 22.6                 | 27.4                 |
| 50         | Mauritania                       | 31.4                    | 25.0                    | -20.5                 | 20.8                 | 28.8                 |
| 51         | Gambia                           | 28.8                    | 24.7                    | -14.3                 | 21.5                 | 27.4                 |
| 52         | Sri Lanka                        | 21.6                    | 24.6                    | 14.1                  | 23.5                 | 25.7                 |
| 53         | Myanmar                          | 24.2                    | 24.4                    | 0.8                   | 23.0                 | 25.9                 |
| 54         | Uzbekistan                       | 24.4                    | 24.3                    | -0.4                  | 22.5                 | 26.3                 |
| 55         | Benin                            | 28.1                    | 24.3                    | -13.6                 | 21.2                 | 27.9                 |
| 56         | Samoa                            | 21                      | 24.0                    | 14.4                  | 21.2                 | 26.8                 |
| 57         | Lao People's Democratic Republic | 24.9                    | 24.0                    | -3.6                  | 22.1                 | 25.8                 |
| 58         | Namibia                          | 28.4                    | 24.0                    | -15.5                 | 22.0                 | 25.9                 |
| 59         | Botswana                         | 29.5                    | 23.8                    | -19.3                 | 19.4                 | 28.7                 |
| 60         | Guyana                           | 21.5                    | 23.3                    | 8.5                   | 21.4                 | 25.4                 |
| 61         | Moldova                          | 26.2                    | 23.0                    | -12.3                 | 20.4                 | 25.7                 |
| 62         | Maldives                         | 21.9                    | 22.9                    | 4.7                   | 20.1                 | 25.6                 |
| 63         | Bangladesh                       | 24.9                    | 22.9                    | -8.1                  | 20.1                 | 25.6                 |
| 64         | Niue                             | 22.1                    | 22.8                    | 3.2                   | 22.0                 | 23.5                 |
| 65         | Cote D'Ivoire                    | 26.8                    | 22.8                    | -15.0                 | 19.7                 | 26.1                 |
| 66         | Georgia                          | 23.8                    | 22.5                    | -5.4                  | 21.1                 | 24.1                 |
| 67         | Viet Nam                         | 21.6                    | 22.5                    | 4.2                   | 21.4                 | 23.7                 |
| 68         | Saint Kitts and Nevis            | 22.7                    | 22.4                    | -1.3                  | 21.2                 | 23.7                 |
| 69         | Croatia                          | 26.3                    | 22.3                    | -15.4                 | 19.5                 | 25.3                 |
| 70         | Mauritius                        | 23.4                    | 21.7                    | -7.2                  | 20.5                 | 23.1                 |
| 71         | Romania                          | 25.2                    | 21.5                    | -14.8                 | 19.7                 | 23.3                 |
| 72         | Antigua and Barbuda              | 20.4                    | 21.4                    | 4.9                   | 20.1                 | 22.8                 |
| 73         | Turkmenistan                     | 24.1                    | 21.3                    | -11.6                 | 20.3                 | 22.3                 |
| 74         | Cabo Verde                       | 28.1                    | 21.1                    | -25.0                 | 16.4                 | 25.8                 |
| 75         | Philippines                      | 21                      | 20.5                    | -2.6                  | 18.8                 | 22.4                 |
| 76         | Grenada                          | 21.6                    | 20.4                    | -5.8                  | 18.5                 | 22.1                 |
| 77         | Slovenia                         | 24.9                    | 20.1                    | -19.4                 | 17.2                 | 23.1                 |
| 78         | Egypt                            | 25                      | 20.0                    | -20.0                 | 18.7                 | 21.3                 |
| 79         | Kazakhstan                       | 23.9                    | 19.9                    | -16.6                 | 18.5                 | 21.4                 |
| 80         | Thailand                         | 20.3                    | 19.9                    | -2.2                  | 18.6                 | 21.1                 |
| 81         | Barbados                         | 21.7                    | 19.8                    | -8.5                  | 17.5                 | 22.2                 |
| 82         | Azerbaijan                       | 23                      | 19.7                    | -14.2                 | 19.3                 | 20.2                 |
| 83         | Indonesia                        | 23.1                    | 19.4                    | -16.0                 | 17.2                 | 21.6                 |
| 84         | South Africa                     | 26.1                    | 19.4                    | -25.7                 | 18.2                 | 20.8                 |
| 85         | Congo                            | 24.9                    | 19.2                    | -23.1                 | 16.7                 | 21.4                 |
| 86         | Tuvalu                           | 21.2                    | 19.1                    | -9.8                  | 18.2                 | 20.1                 |
| 87         | Poland                           | 23                      | 19.0                    | -17.4                 | 18.6                 | 19.5                 |
| 88         | Macedonia                        | 24.1                    | 18.7                    | -22.3                 | 17.1                 | 20.7                 |
| 89         | Cameroon                         | 24.6                    | 18.6                    | -24.5                 | 15.6                 | 21.6                 |
| 90         | Armenia                          | 22.9                    | 18.3                    | -20.3                 | 17.5                 | 19.1                 |
| 91         | Belize                           | 21                      | 18.2                    | -13.1                 | 17.0                 | 19.6                 |
| 92         | Nigeria                          | 25                      | 18.1                    | -27.7                 | 14.9                 | 21.7                 |
| 93         | Djibouti                         | 25.5                    | 18.0                    | -29.2                 | 16.5                 | 19.6                 |
| 94         | Serbia                           | 25.2                    | 18.0                    | -28.4                 | 15.9                 | 20.3                 |
| 95         | Haiti                            | 23.7                    | 18.0                    | -23.9                 | 15.3                 | 20.8                 |
| 96         | Albania                          | 25                      | 18.0                    | -28.2                 | 16.4                 | 19.5                 |
| 97         | Lithuania                        | 23.1                    | 17.8                    | -23.0                 | 17.1                 | 18.7                 |
| 98         | Fiji                             | 20.7                    | 17.6                    | -14.8                 | 15.5                 | 20.1                 |
| 99         | Morocco                          | 25.8                    | 17.4                    | -32.5                 | 14.4                 | 20.6                 |
| 100        | Mongolia                         | 25.6                    | 17.4                    | -32.2                 | 15.2                 | 19.6                 |
| 101        | Slovakia                         | 22.8                    | 17.2                    | -24.6                 | 14.8                 | 19.7                 |
| 102        | Guatemala                        | 20.4                    | 17.2                    | -15.8                 | 16.0                 | 18.4                 |
| 103        | Czechia                          | 21.2                    | 17.1                    | -19.5                 | 16.4                 | 17.8                 |
| 104        | Estonia                          | 20.9                    | 16.9                    | -18.9                 | 16.7                 | 17.3                 |
| 105        | Ghana                            | 22.8                    | 16.9                    | -25.8                 | 13.9                 | 19.6                 |
| 106        | Sao Tome and Principe            | 24.6                    | 16.8                    | -31.9                 | 13.7                 | 20.1                 |

| <b>No.</b> | <b>Country</b>                   | <b>2015<sup>a</sup></b> | <b>2040<sup>a</sup></b> | <b>Δ%<sup>b</sup></b> | <b>L<sup>c</sup></b> | <b>U<sup>c</sup></b> |
|------------|----------------------------------|-------------------------|-------------------------|-----------------------|----------------------|----------------------|
| 107        | Syrian Arab Republic             | 23.8                    | 16.5                    | -30.5                 | 15.4                 | 17.9                 |
| 108        | Iraq                             | 24.4                    | 16.5                    | -32.5                 | 14.2                 | 19.2                 |
| 109        | Honduras                         | 20.2                    | 16.4                    | -18.8                 | 15.2                 | 17.7                 |
| 110        | Montenegro                       | 23.8                    | 16.4                    | -31.1                 | 14.3                 | 18.6                 |
| 111        | Hungary                          | 24                      | 16.1                    | -32.8                 | 14.7                 | 17.7                 |
| 112        | Ukraine                          | 22.3                    | 16.1                    | -27.7                 | 15.4                 | 17.0                 |
| 113        | Saint Vincent and the Grenadines | 20.7                    | 16.1                    | -22.4                 | 14.7                 | 17.4                 |
| 114        | Bulgaria                         | 23                      | 15.9                    | -30.7                 | 13.9                 | 18.4                 |
| 115        | Paraguay                         | 21.3                    | 15.8                    | -26.0                 | 14.4                 | 17.4                 |
| 116        | Seychelles                       | 20.2                    | 15.6                    | -22.5                 | 13.0                 | 18.6                 |
| 117        | Jamaica                          | 19.2                    | 15.3                    | -20.5                 | 13.1                 | 17.6                 |
| 118        | Nicaragua                        | 19.9                    | 15.2                    | -23.9                 | 13.4                 | 17.2                 |
| 119        | Cook Islands                     | 19.5                    | 14.8                    | -23.9                 | 13.9                 | 15.8                 |
| 120        | Gabon                            | 23                      | 14.8                    | -35.7                 | 10.5                 | 19.7                 |
| 121        | Malaysia                         | 20.8                    | 14.8                    | -29.1                 | 12.2                 | 17.4                 |
| 122        | Marshall Islands                 | 18.6                    | 14.7                    | -20.7                 | 12.3                 | 17.5                 |
| 123        | Libya                            | 22.2                    | 14.4                    | -35.3                 | 12.2                 | 17.3                 |
| 124        | Palau                            | 20                      | 14.4                    | -28.2                 | 13.2                 | 15.6                 |
| 125        | Russian Federation               | 22.3                    | 14.3                    | -35.9                 | 12.9                 | 16.0                 |
| 126        | Suriname                         | 19.9                    | 14.2                    | -28.7                 | 12.1                 | 16.7                 |
| 127        | Tunisia                          | 22.5                    | 14.1                    | -37.5                 | 12.4                 | 15.9                 |
| 128        | Latvia                           | 22.9                    | 14.0                    | -38.7                 | 11.4                 | 16.9                 |
| 129        | Algeria                          | 24.6                    | 13.9                    | -43.3                 | 10.9                 | 16.8                 |
| 130        | Korea (North)                    | 16.9                    | 13.9                    | -18.0                 | 12.0                 | 15.8                 |
| 131        | Belarus                          | 21.6                    | 13.6                    | -36.8                 | 12.5                 | 15.3                 |
| 132        | Dominica                         | 19.4                    | 12.9                    | -33.3                 | 10.9                 | 15.3                 |
| 133        | Lebanon                          | 17.8                    | 12.5                    | -29.7                 | 11.4                 | 14.3                 |
| 134        | Panama                           | 17.3                    | 12.4                    | -28.1                 | 11.1                 | 13.8                 |
| 135        | Nauru                            | 17.2                    | 12.2                    | -29.1                 | 11.9                 | 12.6                 |
| 136        | Mexico                           | 17.3                    | 11.9                    | -31.4                 | 11.3                 | 12.4                 |
| 137        | El Salvador                      | 17.2                    | 11.7                    | -31.8                 | 10.7                 | 12.8                 |
| 138        | Argentina                        | 17.6                    | 11.3                    | -35.9                 | 11.7                 | 17.6                 |
| 139        | Brunei Darussalam                | 15.8                    | 11.0                    | -30.7                 | 9.0                  | 13.1                 |
| 140        | Bahamas                          | 16.8                    | 10.9                    | -35.2                 | 10.5                 | 11.4                 |
| 141        | Jordan                           | 18.8                    | 10.8                    | -42.4                 | 9.8                  | 11.9                 |
| 142        | Brazil                           | 19.9                    | 10.8                    | -45.8                 | 9.2                  | 12.5                 |
| 143        | Cuba                             | 16.9                    | 10.8                    | -36.4                 | 9.7                  | 12.1                 |
| 144        | Ecuador                          | 16                      | 10.7                    | -32.8                 | 9.4                  | 12.2                 |
| 145        | Bahrain                          | 19.1                    | 10.7                    | -43.8                 | 10.5                 | 11.0                 |
| 146        | United Arab Emirates             | 18.3                    | 10.6                    | -42.0                 | 9.4                  | 11.8                 |
| 147        | Colombia                         | 16.9                    | 10.6                    | -37.2                 | 9.7                  | 11.6                 |
| 148        | Dominican Republic               | 19.1                    | 10.6                    | -44.6                 | 7.9                  | 13.5                 |
| 149        | Austria                          | 16.8                    | 10.6                    | -37.2                 | 10.0                 | 11.1                 |
| 150        | Chile                            | 16.5                    | 10.5                    | -36.3                 | 10.1                 | 10.9                 |
| 151        | Bolivia                          | 16.1                    | 10.4                    | -35.1                 | 8.7                  | 12.6                 |
| 152        | Venezuela                        | 15.7                    | 9.7                     | -38.3                 | 9.0                  | 10.5                 |
| 153        | Kuwait                           | 20.3                    | 9.6                     | -52.6                 | 8.5                  | 10.9                 |
| 154        | Portugal                         | 19.6                    | 9.5                     | -51.4                 | 6.5                  | 12.9                 |
| 155        | Greece                           | 15.4                    | 9.5                     | -38.3                 | 8.9                  | 10.1                 |
| 156        | New Zealand                      | 13.3                    | 9.5                     | -28.6                 | 9.3                  | 9.7                  |
| 157        | Costa Rica                       | 16.3                    | 9.4                     | -42.5                 | 7.9                  | 11.0                 |
| 158        | Germany                          | 15.5                    | 9.4                     | -39.6                 | 8.9                  | 9.9                  |
| 159        | Cyprus                           | 15.5                    | 9.3                     | -40.2                 | 8.0                  | 10.9                 |
| 160        | Belgium                          | 12.6                    | 9.2                     | -27.3                 | 9.1                  | 9.3                  |
| 161        | Iran (Islamic Republic of)       | 18.9                    | 8.7                     | -54.1                 | 6.5                  | 11.0                 |
| 162        | United States                    | 10.5                    | 8.7                     | -17.6                 | 8.5                  | 8.8                  |
| 163        | Qatar                            | 19.1                    | 8.6                     | -54.7                 | 8.1                  | 9.2                  |
| 164        | Turkey                           | 20.1                    | 8.6                     | -57.0                 | 6.1                  | 12.5                 |
| 165        | Uruguay                          | 16.8                    | 8.6                     | -48.9                 | 8.3                  | 8.9                  |

| No. | Country        | 2015 <sup>a</sup> | 2040 <sup>a</sup> | Δ% <sup>b</sup> | L <sup>c</sup> | U <sup>c</sup> |
|-----|----------------|-------------------|-------------------|-----------------|----------------|----------------|
| 166 | Andorra        | 14.2              | 8.5               | -40.4           | 8.0            | 9.1            |
| 167 | Switzerland    | 13.7              | 8.3               | -39.2           | 6.8            | 10.3           |
| 168 | Finland        | 14.7              | 7.9               | -46.6           | 7.2            | 8.7            |
| 169 | Italy          | 17.1              | 7.8               | -54.4           | 6.6            | 9.1            |
| 170 | France         | 16.4              | 7.7               | -52.7           | 7.0            | 8.5            |
| 171 | Luxembourg     | 15.9              | 7.5               | -52.7           | 6.4            | 8.8            |
| 172 | Norway         | 14.7              | 7.5               | -49.2           | 6.9            | 8.1            |
| 173 | Ireland        | 16.5              | 7.3               | -55.8           | 5.6            | 9.1            |
| 174 | Japan          | 12.6              | 7.3               | -42.3           | 6.8            | 7.9            |
| 175 | Spain          | 14.7              | 6.9               | -52.8           | 6.2            | 7.8            |
| 176 | Iceland        | 13                | 6.8               | -47.4           | 6.0            | 7.9            |
| 177 | Australia      | 12.3              | 6.7               | -45.2           | 6.4            | 7.1            |
| 178 | Israel         | 12.8              | 6.5               | -49.3           | 6.2            | 6.9            |
| 179 | Malta          | 14.3              | 6.2               | -56.7           | 5.9            | 6.5            |
| 180 | Sweden         | 14.4              | 6.1               | -57.6           | 5.6            | 6.8            |
| 181 | Canada         | 10.8              | 5.9               | -45.7           | 5.5            | 6.2            |
| 182 | Denmark        | 14.8              | 5.2               | -64.8           | 3.8            | 6.7            |
| 183 | United Kingdom | 12.4              | 4.9               | -60.1           | 4.2            | 5.9            |
| 184 | Netherlands    | 14.3              | 4.4               | -69.3           | 3.5            | 5.3            |
| 185 | Peru           | 11.2              | 4.4               | -60.8           | 3.4            | 5.5            |
| 186 | Singapore      | 11.3              | 3.9               | -65.7           | 2.8            | 5.3            |

<sup>a</sup> Raised BP (SBP≥140 OR DBP≥90) (%), age-standardised estimate), 18+ years.

<sup>b</sup> Percentage change in hypertension prevalence from 2015 to 2040.

<sup>c</sup> Lower and upper confidence intervals (95%) for the 2040 forecast.

**Table A3.** Projected hypertension prevalence for 2040 (Both).

| No. | Country                  | 2015 <sup>a</sup> | 2040 <sup>a</sup> | Δ% <sup>b</sup> | L <sup>c</sup> | U <sup>c</sup> |
|-----|--------------------------|-------------------|-------------------|-----------------|----------------|----------------|
| 1   | Chad                     | 32.9              | 34.9              | 6.2             | 32.6           | 37.2           |
| 2   | Burundi                  | 29.2              | 34.9              | 19.6            | 33.6           | 36.1           |
| 3   | Niger                    | 33.4              | 34.0              | 1.8             | 32.4           | 35.5           |
| 4   | Mali                     | 32.6              | 33.2              | 1.7             | 31.4           | 34.8           |
| 5   | Malawi                   | 28.9              | 32.9              | 13.7            | 31.6           | 34.1           |
| 6   | Pakistan                 | 30.5              | 32.9              | 7.7             | 31.8           | 33.9           |
| 7   | Uganda                   | 27.3              | 32.8              | 20.1            | 31.9           | 33.6           |
| 8   | Burkina Faso             | 32.6              | 32.7              | 0.3             | 30.2           | 35.1           |
| 9   | Afghanistan              | 30.6              | 32.4              | 5.8             | 31.1           | 33.7           |
| 10  | Nepal                    | 29.4              | 32.2              | 9.4             | 30.8           | 33.4           |
| 11  | Somalia                  | 32.9              | 31.9              | -3.1            | 29.5           | 34.3           |
| 12  | Eritrea                  | 29.1              | 31.6              | 8.7             | 33.0           | 50.0           |
| 13  | Yemen                    | 30.7              | 31.6              | 2.9             | 28.3           | 34.9           |
| 14  | Croatia                  | 32.4              | 31.5              | -2.7            | 28.1           | 35.5           |
| 15  | Bosnia and Herzegovina   | 30.8              | 31.3              | 1.8             | 26.5           | 35.8           |
| 16  | Sudan                    | 30.2              | 31.1              | 3.0             | 29.1           | 33.0           |
| 17  | Central African Republic | 31.2              | 30.7              | -1.6            | 29.1           | 32.3           |
| 18  | Papua New Guinea         | 25.6              | 30.6              | 19.6            | 29.6           | 31.5           |
| 19  | Trinidad and Tobago      | 25.8              | 30.5              | 18.1            | 29.1           | 31.8           |
| 20  | Comoros                  | 27.9              | 30.5              | 9.2             | 29.0           | 31.9           |
| 21  | Guinea                   | 30.3              | 30.3              | 0.1             | 28.7           | 32.0           |
| 22  | Mozambique               | 29.1              | 30.0              | 3.0             | 28.0           | 31.9           |
| 23  | Saint Lucia              | 27.1              | 29.6              | 9.1             | 27.3           | 31.6           |
| 24  | Eswatini                 | 29.8              | 29.4              | -1.3            | 25.6           | 33.1           |
| 25  | Lesotho                  | 29                | 29.4              | 1.3             | 28.1           | 30.8           |
| 26  | Tanzania                 | 27.3              | 29.0              | 6.2             | 28.1           | 29.9           |
| 27  | Timor-Leste              | 27.6              | 28.8              | 4.4             | 27.2           | 30.5           |
| 28  | Micronesia               | 25                | 28.8              | 15.3            | 27.3           | 30.3           |
| 29  | Moldova                  | 29.8              | 28.7              | -3.8            | 25.6           | 32.0           |
| 30  | Cambodia                 | 26.1              | 28.7              | 9.8             | 26.1           | 31.0           |



| <b>No.</b> | <b>Country</b>                        | <b>2015<sup>a</sup></b> | <b>2040<sup>a</sup></b> | <b>Δ%<sup>b</sup></b> | <b>L<sup>c</sup></b> | <b>U<sup>c</sup></b> |
|------------|---------------------------------------|-------------------------|-------------------------|-----------------------|----------------------|----------------------|
| 31         | Bhutan                                | 28.1                    | 28.6                    | 1.9                   | 27.2                 | 30.0                 |
| 32         | Tajikistan                            | 26.1                    | 28.5                    | 9.1                   | 26.4                 | 30.6                 |
| 33         | Kenya                                 | 26.7                    | 28.4                    | 6.4                   | 27.0                 | 29.8                 |
| 34         | Rwanda                                | 26.7                    | 28.2                    | 5.6                   | 25.2                 | 30.9                 |
| 35         | Madagascar                            | 28.1                    | 28.1                    | 0.1                   | 26.9                 | 29.5                 |
| 36         | Tonga                                 | 23.7                    | 28.1                    | 18.5                  | 26.1                 | 30.0                 |
| 37         | Guinea-Bissau                         | 30.3                    | 27.7                    | -8.7                  | 25.6                 | 29.7                 |
| 38         | Romania                               | 30                      | 27.5                    | -8.3                  | 24.7                 | 30.1                 |
| 39         | Equatorial Guinea                     | 28.4                    | 27.4                    | -3.4                  | 24.7                 | 30.3                 |
| 40         | Congo, the Democratic Republic of the | 28.5                    | 27.4                    | -3.8                  | 25.8                 | 29.2                 |
| 41         | Angola                                | 29.7                    | 27.0                    | -9.1                  | 24.9                 | 29.2                 |
| 42         | Georgia                               | 26.3                    | 26.9                    | 2.1                   | 24.6                 | 29.4                 |
| 43         | India                                 | 25.8                    | 26.8                    | 4.0                   | 26.0                 | 27.6                 |
| 44         | Senegal                               | 30.2                    | 26.7                    | -11.5                 | 24.4                 | 29.1                 |
| 45         | Vanuatu                               | 24.2                    | 26.7                    | 10.3                  | 25.1                 | 28.4                 |
| 46         | Kyrgyzstan                            | 26.7                    | 26.7                    | 0.0                   | 25.4                 | 28.0                 |
| 47         | Slovenia                              | 30.5                    | 26.3                    | -13.8                 | 23.1                 | 29.8                 |
| 48         | Togo                                  | 28.9                    | 26.2                    | -9.4                  | 24.0                 | 28.3                 |
| 49         | Sierra Leone                          | 30.3                    | 26.1                    | -13.9                 | 23.1                 | 29.1                 |
| 50         | Zimbabwe                              | 28.2                    | 26.0                    | -7.6                  | 24.3                 | 28.0                 |
| 51         | Uzbekistan                            | 25.6                    | 25.7                    | 0.6                   | 23.8                 | 27.6                 |
| 52         | Zambia                                | 27.1                    | 25.5                    | -5.9                  | 23.2                 | 27.7                 |
| 53         | Kazakhstan                            | 27.1                    | 25.4                    | -6.3                  | 23.1                 | 27.5                 |
| 54         | Myanmar                               | 24.6                    | 25.3                    | 3.0                   | 24.4                 | 26.3                 |
| 55         | Viet Nam                              | 23.4                    | 25.2                    | 7.8                   | 24.6                 | 26.0                 |
| 56         | Lithuania                             | 29.3                    | 25.1                    | -14.4                 | 24.3                 | 26.3                 |
| 57         | Niue                                  | 24.2                    | 24.9                    | 2.9                   | 24.2                 | 25.6                 |
| 58         | Antigua and Barbuda                   | 23.4                    | 24.8                    | 6.1                   | 23.2                 | 26.8                 |
| 59         | Botswana                              | 29.6                    | 24.8                    | -16.3                 | 19.1                 | 31.0                 |
| 60         | Maldives                              | 24.4                    | 24.7                    | 1.4                   | 22.8                 | 26.9                 |
| 61         | Saint Kitts and Nevis                 | 25.3                    | 24.7                    | -2.4                  | 23.5                 | 26.0                 |
| 62         | Albania                               | 29                      | 24.7                    | -14.9                 | 23.0                 | 26.1                 |
| 63         | Mauritania                            | 31.7                    | 24.6                    | -22.3                 | 20.8                 | 28.7                 |
| 64         | Liberia                               | 28.3                    | 24.6                    | -13.1                 | 21.1                 | 28.4                 |
| 65         | Latvia                                | 29.4                    | 24.5                    | -16.7                 | 20.9                 | 28.7                 |
| 66         | Solomon Islands                       | 22                      | 24.5                    | 11.3                  | 23.4                 | 25.7                 |
| 67         | Guyana                                | 23.1                    | 24.3                    | 5.1                   | 22.3                 | 26.2                 |
| 68         | Gambia                                | 29.1                    | 24.1                    | -17.0                 | 21.4                 | 27.1                 |
| 69         | Namibia                               | 28.5                    | 24.0                    | -15.8                 | 22.5                 | 25.4                 |
| 70         | Macedonia                             | 28.5                    | 23.9                    | -16.1                 | 21.6                 | 26.4                 |
| 71         | Lao People's Democratic Republic      | 24.8                    | 23.7                    | -4.4                  | 22.0                 | 25.5                 |
| 72         | Grenada                               | 24.3                    | 23.7                    | -2.6                  | 22.3                 | 25.0                 |
| 73         | Turkmenistan                          | 25.4                    | 23.3                    | -8.2                  | 22.2                 | 24.4                 |
| 74         | Slovakia                              | 28.5                    | 23.1                    | -19.0                 | 20.7                 | 25.7                 |
| 75         | Mauritius                             | 25                      | 22.9                    | -8.5                  | 21.3                 | 24.5                 |
| 76         | Barbados                              | 24.4                    | 22.8                    | -6.6                  | 20.0                 | 25.9                 |
| 77         | Poland                                | 28.7                    | 22.7                    | -21.0                 | 20.3                 | 25.7                 |
| 78         | Montenegro                            | 29.1                    | 22.6                    | -22.4                 | 19.9                 | 25.6                 |
| 79         | Cote D'ivoire                         | 27.2                    | 22.5                    | -17.3                 | 19.6                 | 25.3                 |
| 80         | Armenia                               | 25.5                    | 22.4                    | -12.1                 | 20.4                 | 24.4                 |
| 81         | Hungary                               | 30                      | 22.4                    | -25.4                 | 20.6                 | 24.4                 |
| 82         | Bangladesh                            | 24.7                    | 22.4                    | -9.4                  | 20.0                 | 25.1                 |
| 83         | Azerbaijan                            | 24.5                    | 22.2                    | -9.5                  | 21.1                 | 23.2                 |
| 84         | Brunei Darussalam                     | 28.4                    | 22.2                    | -21.9                 | 19.4                 | 25.7                 |
| 85         | Cabo Verde                            | 29.5                    | 22.2                    | -24.9                 | 17.1                 | 27.1                 |
| 86         | Thailand                              | 22.3                    | 22.1                    | -0.7                  | 20.4                 | 24.1                 |
| 87         | Serbia                                | 29.5                    | 22.0                    | -25.4                 | 19.2                 | 25.1                 |
| 88         | Benin                                 | 27.7                    | 22.0                    | -20.6                 | 18.4                 | 25.7                 |
| 89         | Tuvalu                                | 23.7                    | 22.0                    | -7.2                  | 20.8                 | 23.1                 |

| <b>No.</b> | <b>Country</b>                   | <b>2015<sup>a</sup></b> | <b>2040<sup>a</sup></b> | <b>Δ%<sup>b</sup></b> | <b>L<sup>c</sup></b> | <b>U<sup>c</sup></b> |
|------------|----------------------------------|-------------------------|-------------------------|-----------------------|----------------------|----------------------|
| 90         | Mongolia                         | 29                      | 22.0                    | -24.2                 | 19.7                 | 24.6                 |
| 91         | Czechia                          | 27.9                    | 21.8                    | -22.0                 | 18.9                 | 25.0                 |
| 92         | Philippines                      | 22.6                    | 21.6                    | -4.6                  | 20.2                 | 22.9                 |
| 93         | Kiribati                         | 21.5                    | 21.5                    | 0.1                   | 20.5                 | 22.5                 |
| 94         | Estonia                          | 27.4                    | 21.4                    | -22.0                 | 19.9                 | 23.4                 |
| 95         | Egypt                            | 25                      | 21.3                    | -14.9                 | 20.7                 | 21.8                 |
| 96         | Ukraine                          | 27.1                    | 21.1                    | -22.0                 | 19.7                 | 23.1                 |
| 97         | Congo                            | 26.2                    | 21.1                    | -19.6                 | 18.6                 | 23.6                 |
| 98         | South Africa                     | 26.9                    | 20.7                    | -23.1                 | 19.4                 | 22.0                 |
| 99         | Indonesia                        | 23.8                    | 20.4                    | -14.3                 | 18.5                 | 22.3                 |
| 100        | Haiti                            | 24.5                    | 20.2                    | -17.4                 | 17.9                 | 22.4                 |
| 101        | Russian Federation               | 27.2                    | 20.0                    | -26.5                 | 18.2                 | 22.5                 |
| 102        | Morocco                          | 26.1                    | 19.8                    | -24.3                 | 17.8                 | 21.8                 |
| 103        | Djibouti                         | 26.8                    | 19.7                    | -26.5                 | 18.2                 | 21.5                 |
| 104        | Ethiopia                         | 30.3                    | 19.3                    | -36.5                 | 16.9                 | 21.6                 |
| 105        | Belize                           | 22.7                    | 19.1                    | -15.7                 | 17.6                 | 20.8                 |
| 106        | Saint Vincent and the Grenadines | 23.3                    | 19.1                    | -18.1                 | 17.7                 | 20.4                 |
| 107        | Belarus                          | 27.1                    | 19.0                    | -29.9                 | 17.2                 | 21.3                 |
| 108        | Iraq                             | 25.2                    | 18.9                    | -24.9                 | 16.9                 | 21.1                 |
| 109        | Paraguay                         | 24.6                    | 18.8                    | -23.4                 | 16.7                 | 21.1                 |
| 110        | Seychelles                       | 23.5                    | 18.8                    | -20.1                 | 16.4                 | 21.1                 |
| 111        | Guatemala                        | 21.2                    | 18.7                    | -12.0                 | 16.7                 | 20.6                 |
| 112        | Honduras                         | 21.4                    | 18.6                    | -13.2                 | 17.4                 | 19.7                 |
| 113        | Jamaica                          | 21.8                    | 18.1                    | -17.0                 | 15.8                 | 20.3                 |
| 114        | Palau                            | 22.9                    | 18.1                    | -21.1                 | 16.7                 | 19.5                 |
| 115        | Syrian Arab Republic             | 24.5                    | 18.1                    | -26.3                 | 16.4                 | 19.9                 |
| 116        | Gabon                            | 25.5                    | 18.0                    | -29.5                 | 13.9                 | 23.6                 |
| 117        | Marshall Islands                 | 21.3                    | 17.9                    | -16.2                 | 16.2                 | 19.6                 |
| 118        | Cook Islands                     | 22.3                    | 17.8                    | -20.4                 | 16.8                 | 18.6                 |
| 119        | Sao Tome and Principe            | 25.8                    | 17.7                    | -31.4                 | 14.9                 | 20.8                 |
| 120        | Cameroon                         | 24.8                    | 17.6                    | -28.9                 | 14.9                 | 20.6                 |
| 121        | Suriname                         | 22.4                    | 17.6                    | -21.4                 | 16.3                 | 19.4                 |
| 122        | Argentina                        | 22.6                    | 17.5                    | -22.8                 | 17.2                 | 17.7                 |
| 123        | Algeria                          | 25.1                    | 17.4                    | -30.8                 | 15.5                 | 19.8                 |
| 124        | Oman                             | 24.8                    | 17.1                    | -31.0                 | 13.2                 | 21.7                 |
| 125        | Ghana                            | 23.7                    | 17.0                    | -28.2                 | 14.5                 | 19.7                 |
| 126        | Nicaragua                        | 20.8                    | 16.8                    | -19.0                 | 15.2                 | 18.4                 |
| 127        | Malaysia                         | 22.9                    | 16.4                    | -28.2                 | 13.5                 | 19.9                 |
| 128        | Korea (North)                    | 18.2                    | 16.3                    | -10.5                 | 16.2                 | 16.4                 |
| 129        | Tunisia                          | 23.2                    | 16.0                    | -30.9                 | 14.5                 | 17.5                 |
| 130        | Dominica                         | 22.5                    | 15.9                    | -29.1                 | 14.1                 | 18.2                 |
| 131        | Panama                           | 19.9                    | 15.9                    | -20.2                 | 15.0                 | 16.8                 |
| 132        | Nauru                            | 20.5                    | 15.5                    | -24.2                 | 15.2                 | 16.0                 |
| 133        | Brazil                           | 23.3                    | 15.5                    | -33.3                 | 14.0                 | 17.2                 |
| 134        | Lebanon                          | 20.7                    | 15.4                    | -25.6                 | 12.1                 | 19.4                 |
| 135        | Chile                            | 20.9                    | 15.3                    | -26.6                 | 14.9                 | 15.8                 |
| 136        | Nigeria                          | 23.9                    | 15.3                    | -35.9                 | 11.4                 | 19.7                 |
| 137        | China                            | 19.2                    | 15.3                    | -20.4                 | 12.4                 | 18.2                 |
| 138        | Saudi Arabia                     | 23.3                    | 14.8                    | -36.5                 | 12.5                 | 17.9                 |
| 139        | Mexico                           | 19.7                    | 14.3                    | -27.5                 | 13.2                 | 15.5                 |
| 140        | Bahamas                          | 20.9                    | 14.2                    | -32.2                 | 13.2                 | 15.2                 |
| 141        | Ecuador                          | 17.9                    | 14.1                    | -21.1                 | 12.3                 | 16.2                 |
| 142        | Portugal                         | 24.4                    | 14.0                    | -42.6                 | 10.8                 | 17.3                 |
| 143        | El Salvador                      | 18.7                    | 13.9                    | -25.6                 | 13.0                 | 14.9                 |
| 144        | Dominican Republic               | 21.5                    | 13.9                    | -35.4                 | 10.7                 | 17.0                 |
| 145        | Jordan                           | 21                      | 13.9                    | -34.0                 | 12.4                 | 15.7                 |
| 146        | Colombia                         | 19.2                    | 13.7                    | -28.8                 | 12.8                 | 14.6                 |
| 147        | Brunei Darussalam                | 18.9                    | 13.6                    | -28.1                 | 11.8                 | 15.6                 |
| 148        | Belgium                          | 17.5                    | 13.3                    | -23.9                 | 13.1                 | 13.6                 |

| <b>No.</b> | <b>Country</b>             | <b>2015<sup>a</sup></b> | <b>2040<sup>a</sup></b> | <b>Δ%<sup>b</sup></b> | <b>L<sup>c</sup></b> | <b>U<sup>c</sup></b> |
|------------|----------------------------|-------------------------|-------------------------|-----------------------|----------------------|----------------------|
| 149        | Austria                    | 21                      | 13.1                    | -37.7                 | 12.2                 | 14.1                 |
| 150        | Bolivia                    | 17.9                    | 13.1                    | -27.0                 | 11.1                 | 15.3                 |
| 151        | United Arab Emirates       | 21.1                    | 12.9                    | -38.9                 | 11.2                 | 15.3                 |
| 152        | Qatar                      | 22.4                    | 12.9                    | -42.5                 | 11.2                 | 14.5                 |
| 153        | Bahrain                    | 21.4                    | 12.9                    | -39.9                 | 12.1                 | 13.6                 |
| 154        | Costa Rica                 | 18.7                    | 12.6                    | -32.5                 | 11.0                 | 14.4                 |
| 155        | Kuwait                     | 23.6                    | 12.4                    | -47.3                 | 9.5                  | 16.4                 |
| 156        | Venezuela                  | 18.6                    | 12.3                    | -34.1                 | 11.5                 | 13.2                 |
| 157        | Luxembourg                 | 21.9                    | 12.2                    | -44.1                 | 10.2                 | 14.6                 |
| 158        | Greece                     | 19.1                    | 12.1                    | -36.6                 | 11.2                 | 13.1                 |
| 159        | Switzerland                | 18                      | 12.1                    | -32.9                 | 9.7                  | 15.3                 |
| 160        | Cyprus                     | 19.8                    | 12.0                    | -39.5                 | 9.3                  | 15.5                 |
| 161        | Cuba                       | 19                      | 11.9                    | -37.1                 | 9.6                  | 14.5                 |
| 162        | Uruguay                    | 20.7                    | 11.9                    | -42.5                 | 11.3                 | 12.6                 |
| 163        | Japan                      | 17.6                    | 11.6                    | -34.0                 | 10.9                 | 12.4                 |
| 164        | United States              | 12.9                    | 11.5                    | -10.7                 | 11.5                 | 11.6                 |
| 165        | Germany                    | 19.9                    | 11.5                    | -42.3                 | 10.6                 | 12.6                 |
| 166        | Iran (Islamic Republic of) | 19.7                    | 11.4                    | -41.9                 | 9.9                  | 13.2                 |
| 167        | New Zealand                | 16.2                    | 11.3                    | -30.4                 | 10.9                 | 11.8                 |
| 168        | Andorra                    | 18.7                    | 11.2                    | -40.0                 | 10.3                 | 12.3                 |
| 169        | Fiji                       | 21.7                    | 11.1                    | -48.9                 | 9.9                  | 12.5                 |
| 170        | Finland                    | 19.4                    | 11.1                    | -42.9                 | 9.9                  | 12.5                 |
| 171        | Iceland                    | 19.7                    | 10.9                    | -44.4                 | 9.7                  | 12.3                 |
| 172        | Turkey                     | 20.3                    | 10.6                    | -48.0                 | 7.8                  | 13.6                 |
| 173        | France                     | 22                      | 10.3                    | -53.3                 | 8.8                  | 11.7                 |
| 174        | Norway                     | 19.7                    | 9.9                     | -49.9                 | 9.3                  | 10.5                 |
| 175        | Italy                      | 21.2                    | 9.7                     | -54.4                 | 7.8                  | 11.9                 |
| 176        | Malta                      | 19.4                    | 9.6                     | -50.5                 | 8.9                  | 10.3                 |
| 177        | Ireland                    | 19.7                    | 9.2                     | -53.4                 | 7.2                  | 11.5                 |
| 178        | Israel                     | 16.6                    | 8.9                     | -46.6                 | 8.3                  | 9.5                  |
| 179        | Spain                      | 19.2                    | 8.4                     | -56.1                 | 7.0                  | 10.3                 |
| 180        | Peru                       | 13.7                    | 8.3                     | -39.7                 | 7.7                  | 9.0                  |
| 181        | Denmark                    | 20.6                    | 7.8                     | -62.1                 | 4.9                  | 10.9                 |
| 182        | Sweden                     | 19.3                    | 7.5                     | -61.0                 | 6.6                  | 8.7                  |
| 183        | Australia                  | 15.2                    | 6.8                     | -55.1                 | 6.2                  | 7.5                  |
| 184        | Netherlands                | 18.7                    | 6.6                     | -64.7                 | 5.5                  | 7.7                  |
| 185        | Singapore                  | 14.6                    | 6.1                     | -57.9                 | 4.7                  | 7.9                  |
| 186        | Canada                     | 13.2                    | 5.7                     | -56.7                 | 5.1                  | 6.3                  |
| 187        | United Kingdom             | 15.2                    | 5.7                     | -62.7                 | 4.8                  | 6.7                  |

<sup>a</sup> Raised BP (SBP $\geq$ 140 OR DBP $\geq$ 90) (% , age-standardised estimate), 18+ years.

<sup>b</sup> Percentage change in hypertension prevalence from 2015 to 2040.

<sup>c</sup> Lower and upper confidence intervals (95%) for the 2040 forecast.

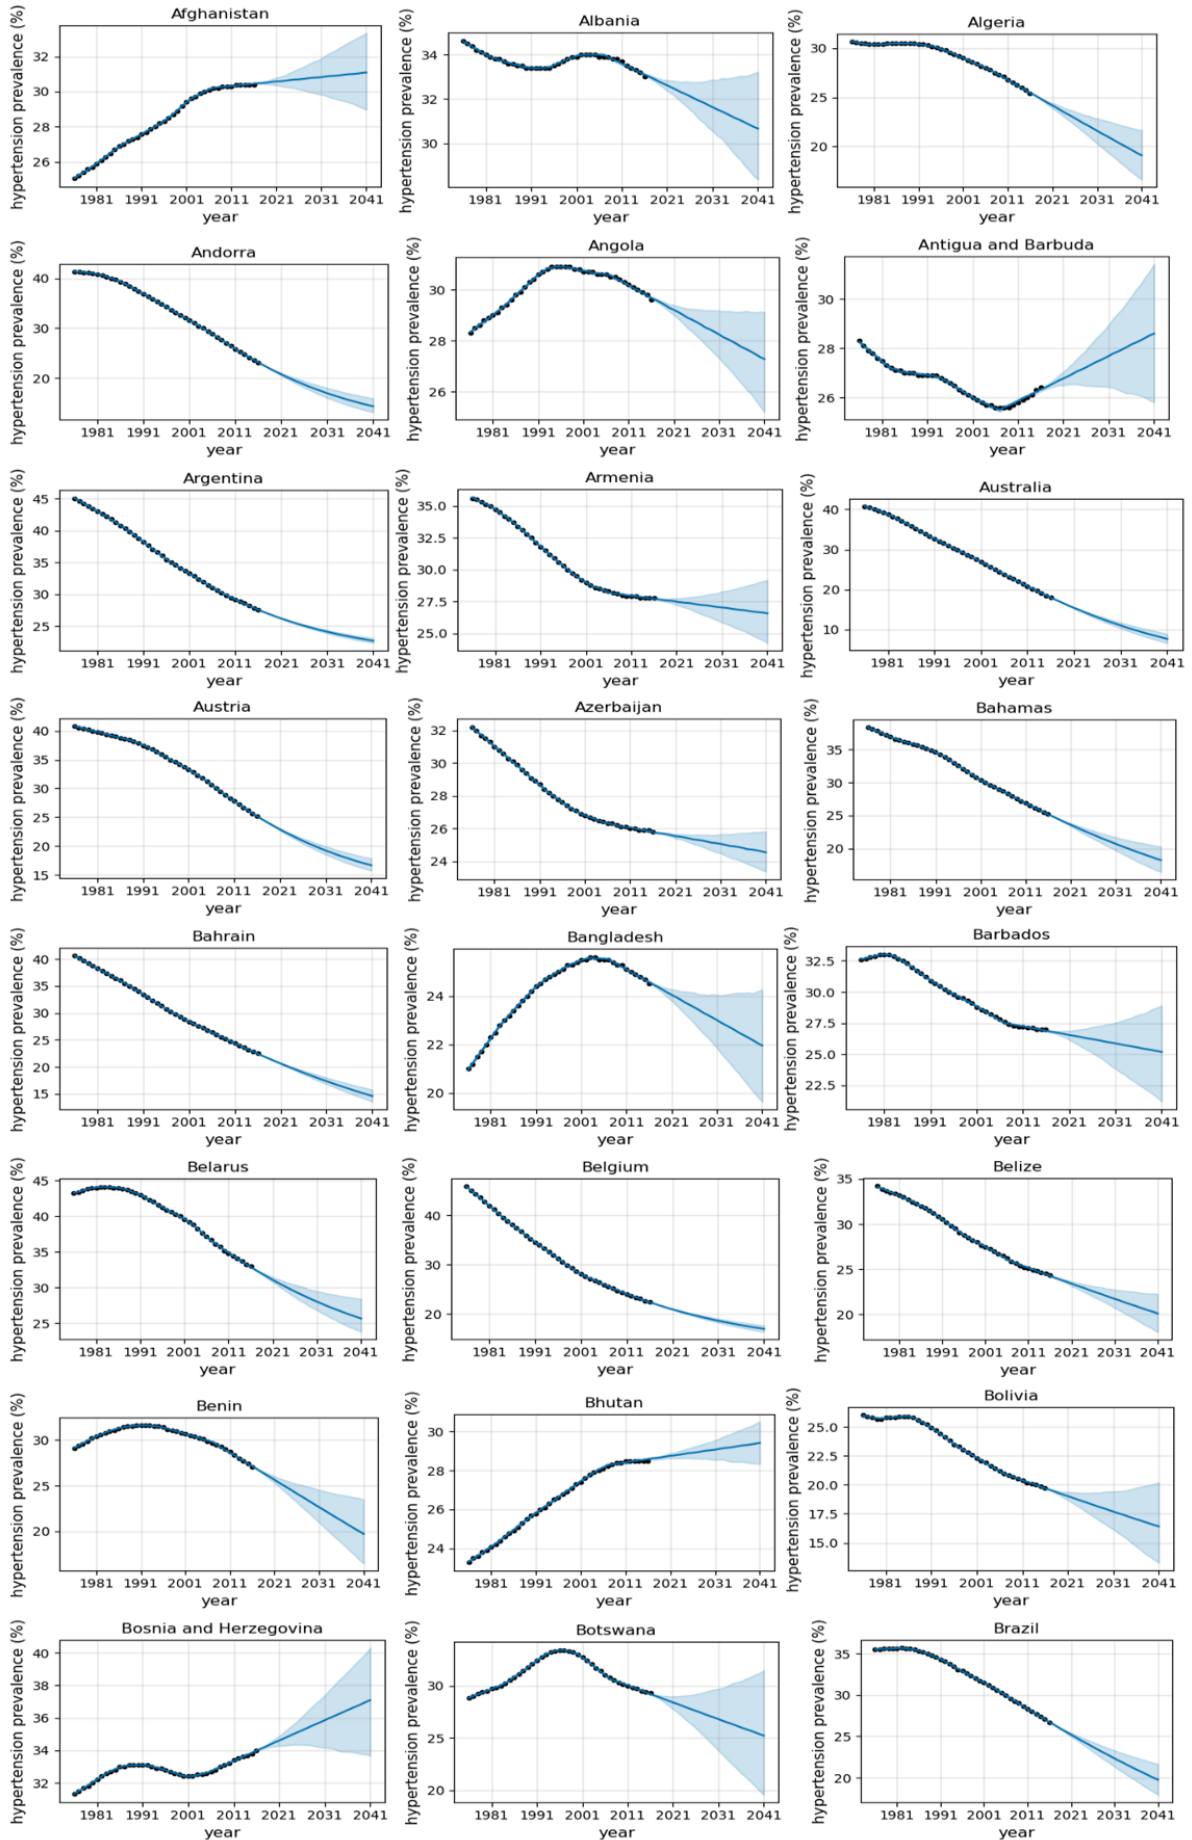

**Fig. A1a.** Plot of actual data (dotted) and fitted curve (95% CI) for hypertension prevalence (Male)

*A glimpse into the future: modelling global prevalence of hypertension*

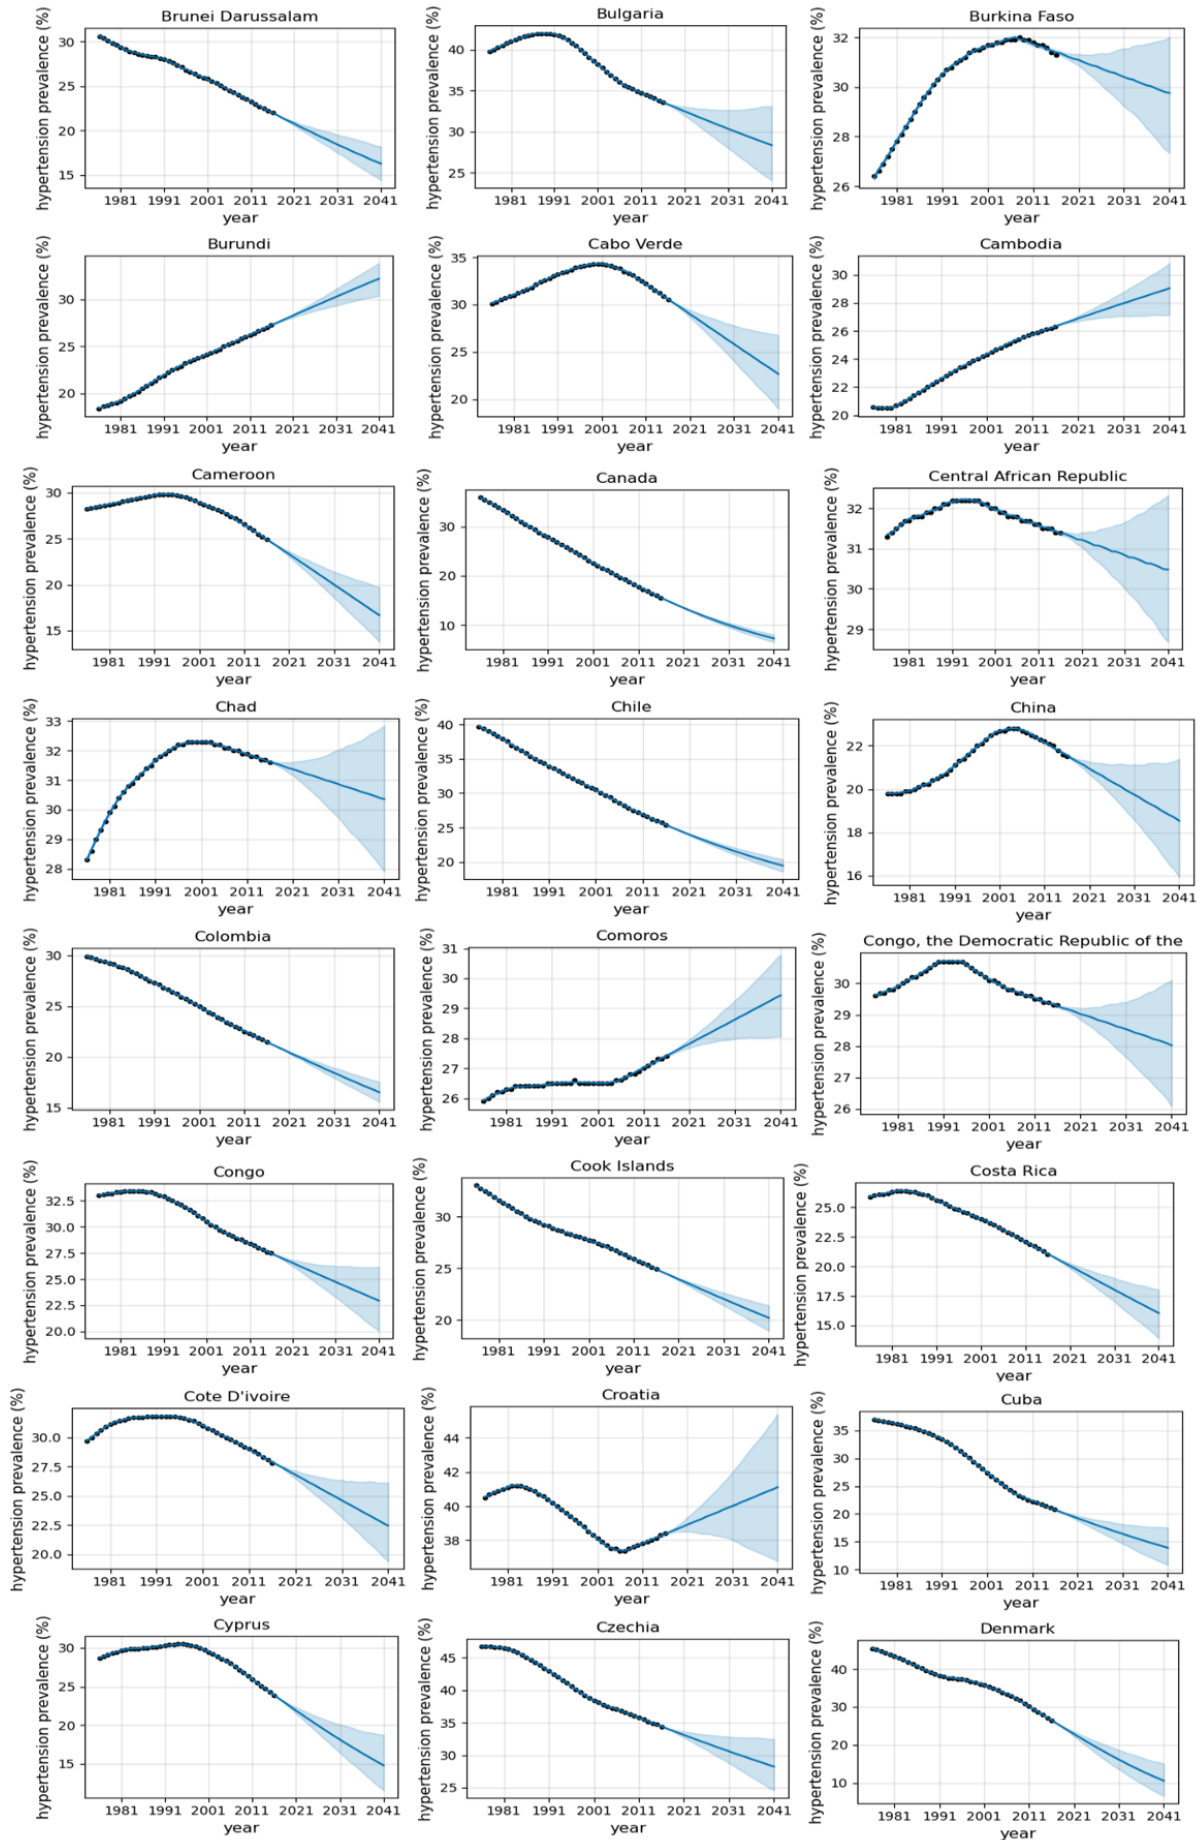

**Fig. A1b.** Plot of actual data (dotted) and fitted curve (95% CI) for hypertension prevalence (Male)

*A glimpse into the future: modelling global prevalence of hypertension*

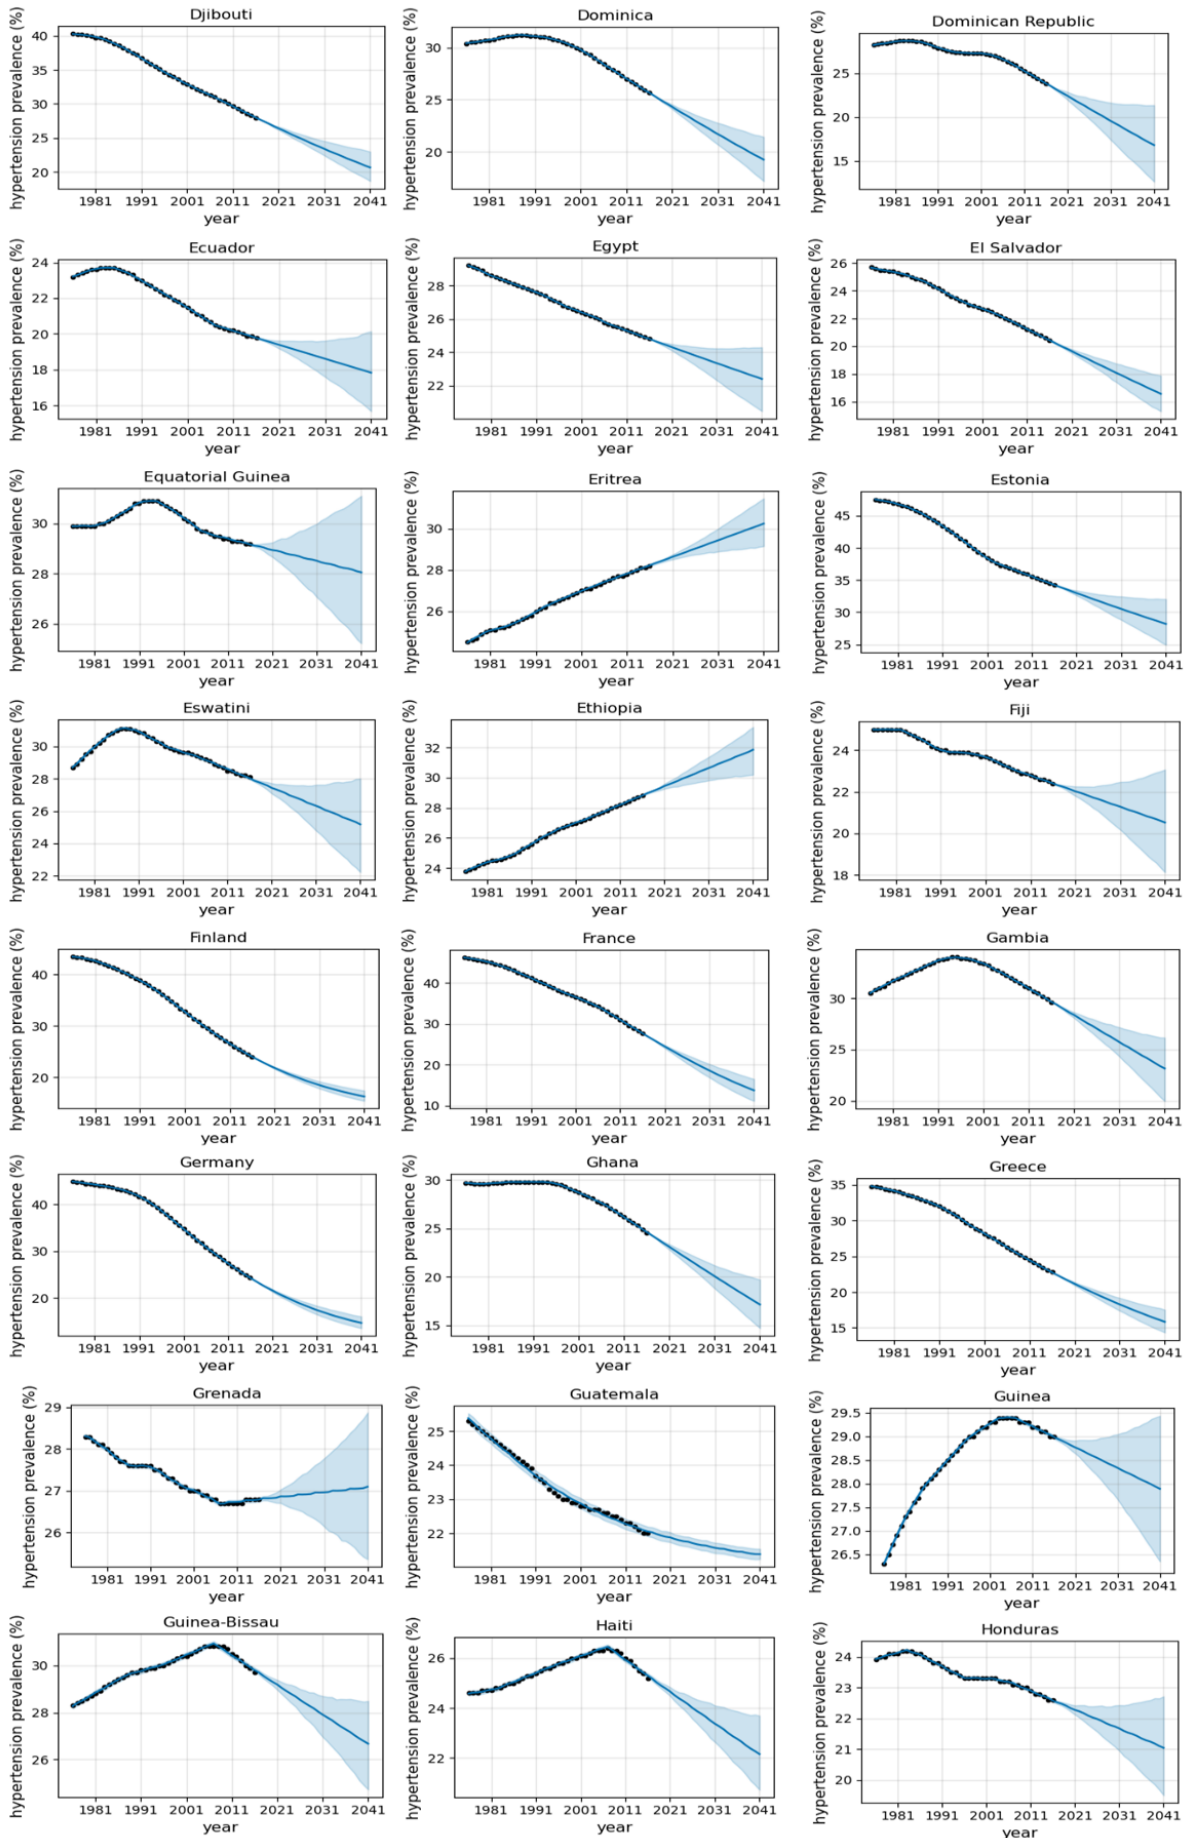

**Fig. A1c.** Plot of actual data (dotted) and fitted curve (95% CI) for hypertension prevalence (Male)

*A glimpse into the future: modelling global prevalence of hypertension*

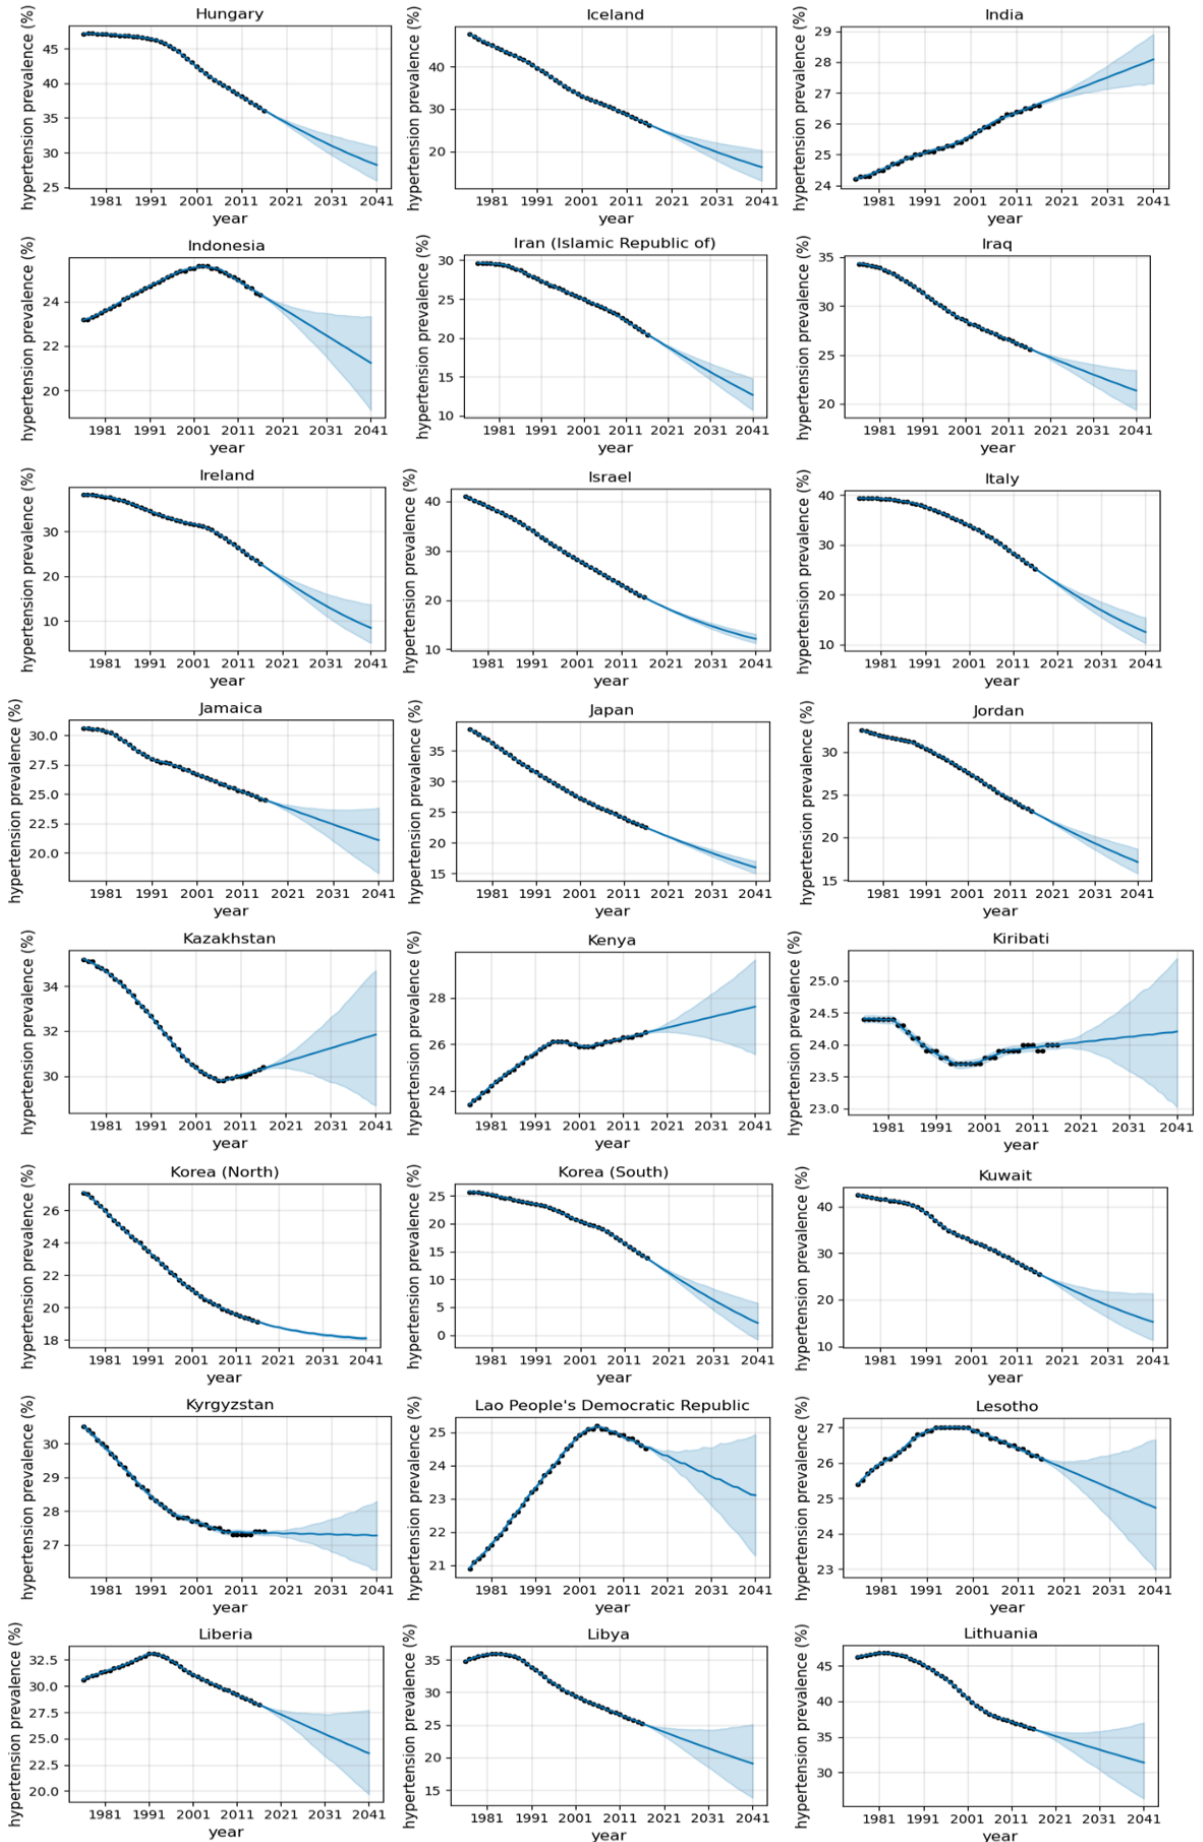

**Fig. A1d.** Plot of actual data (dotted) and fitted curve (95% CI) for hypertension prevalence (Male)

*A glimpse into the future: modelling global prevalence of hypertension*

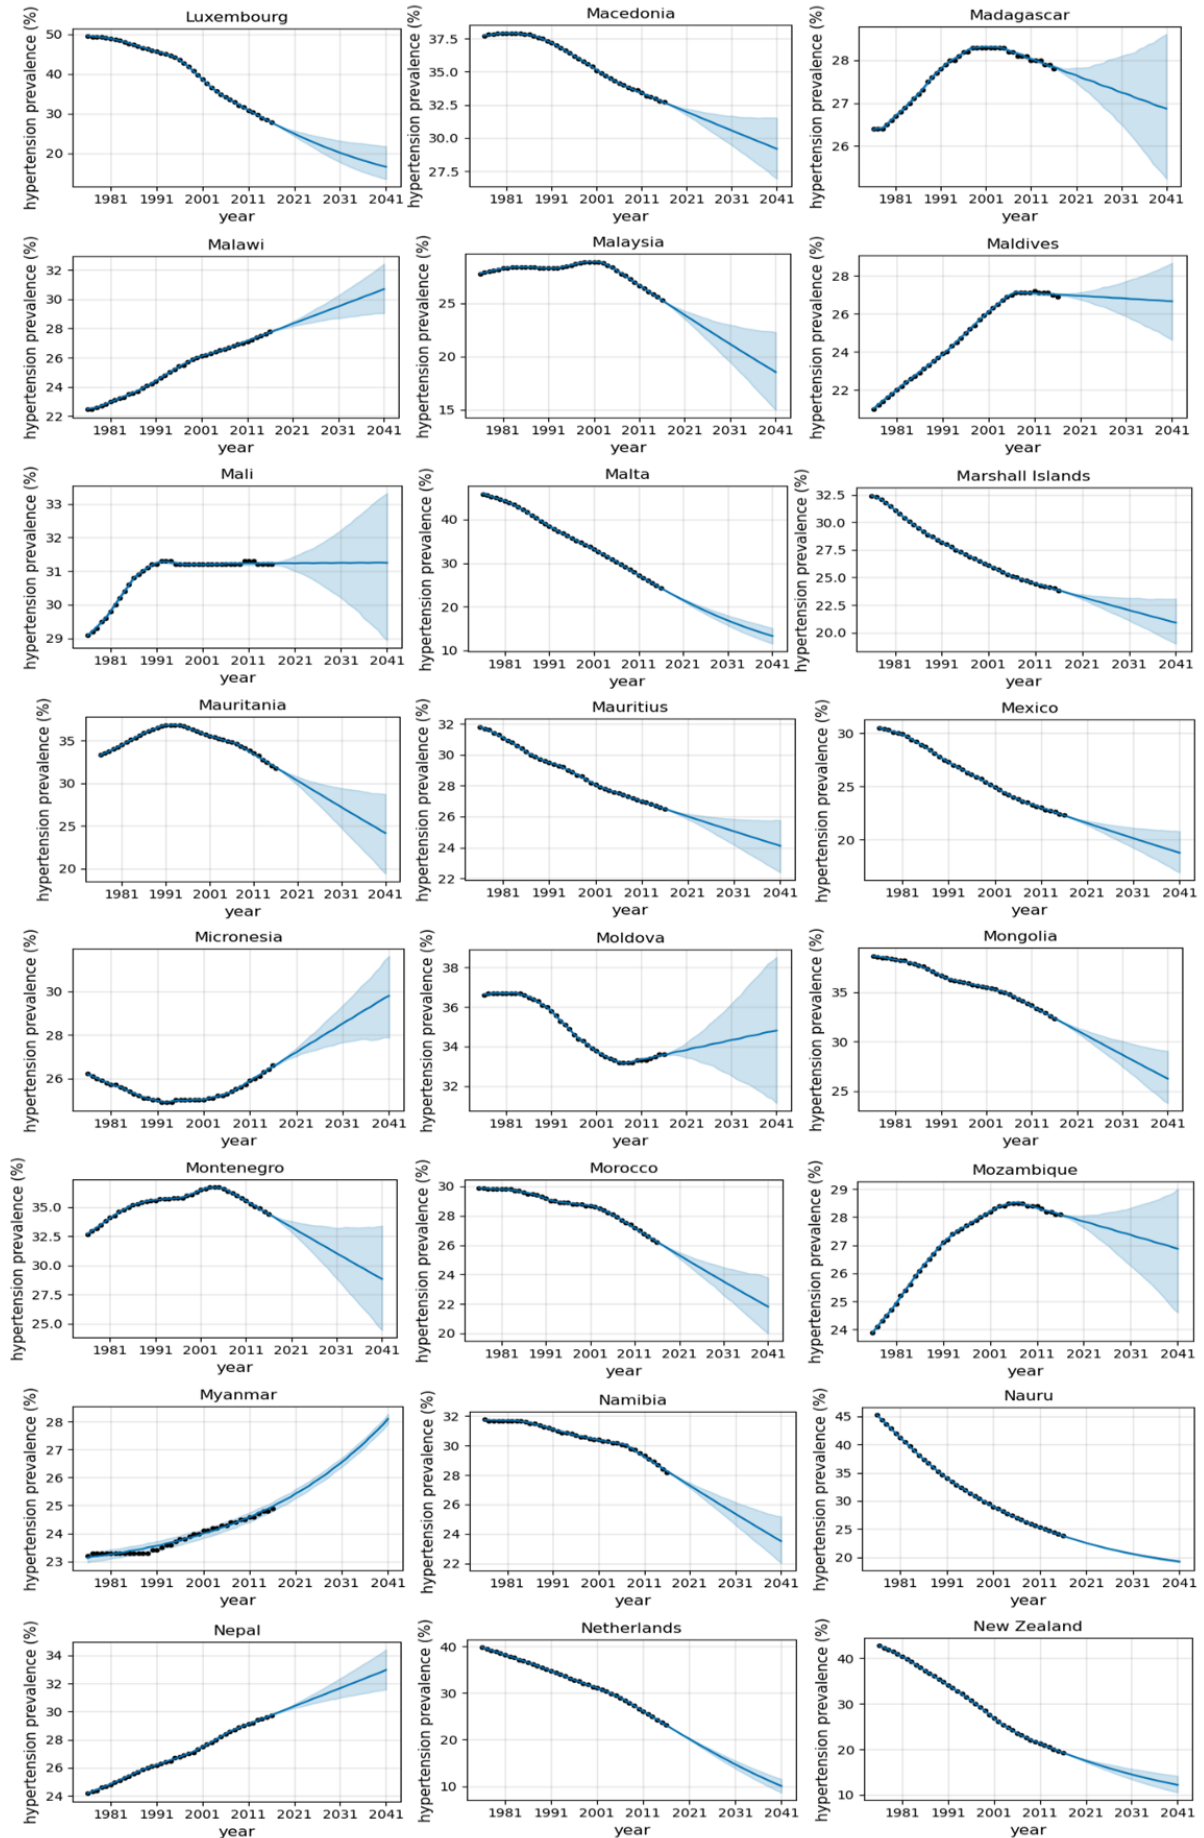

**Fig. A1e.** Plot of actual data (dotted) and fitted curve (95% CI) for hypertension prevalence (Male)



*A glimpse into the future: modelling global prevalence of hypertension*

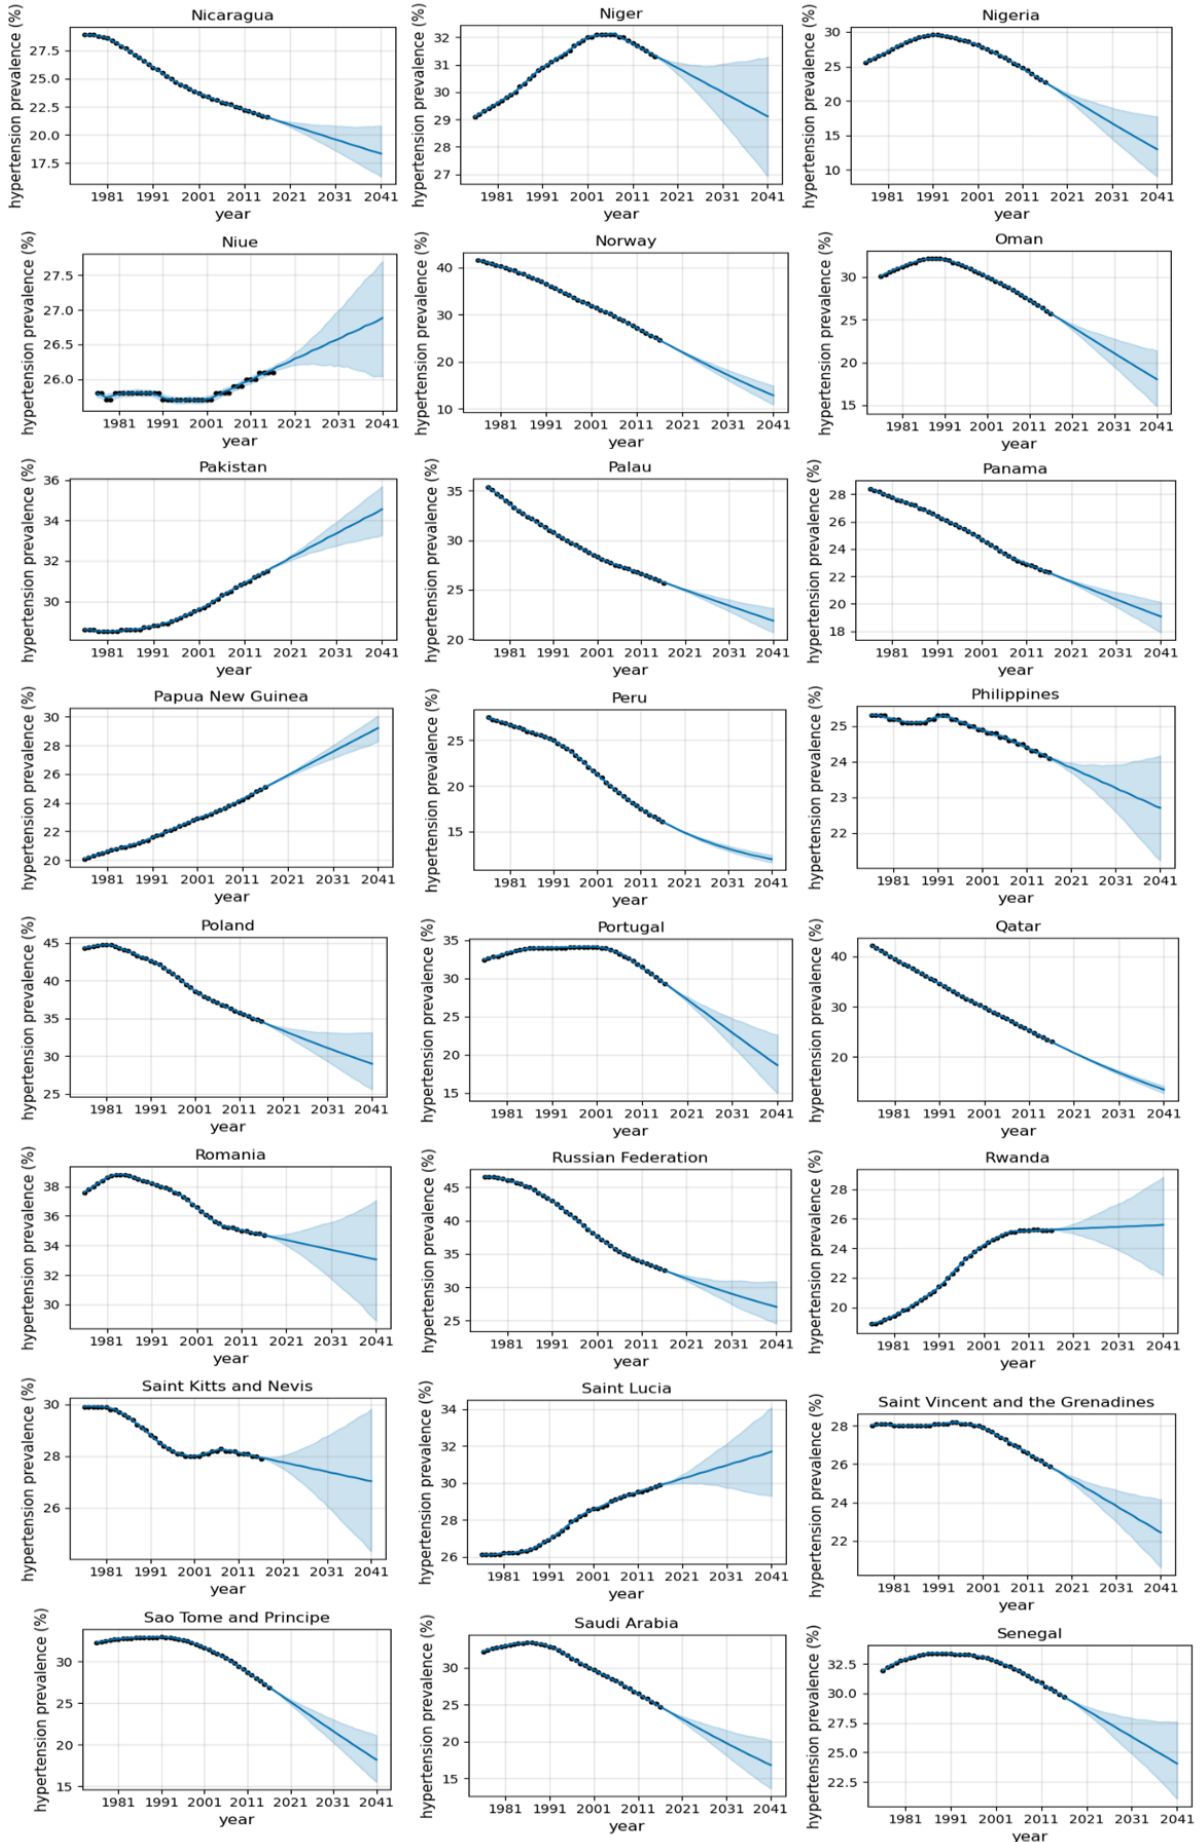

**Fig. A1f.** Plot of actual data (dotted) and fitted curve (95% CI) for hypertension prevalence (Male)

*A glimpse into the future: modelling global prevalence of hypertension*

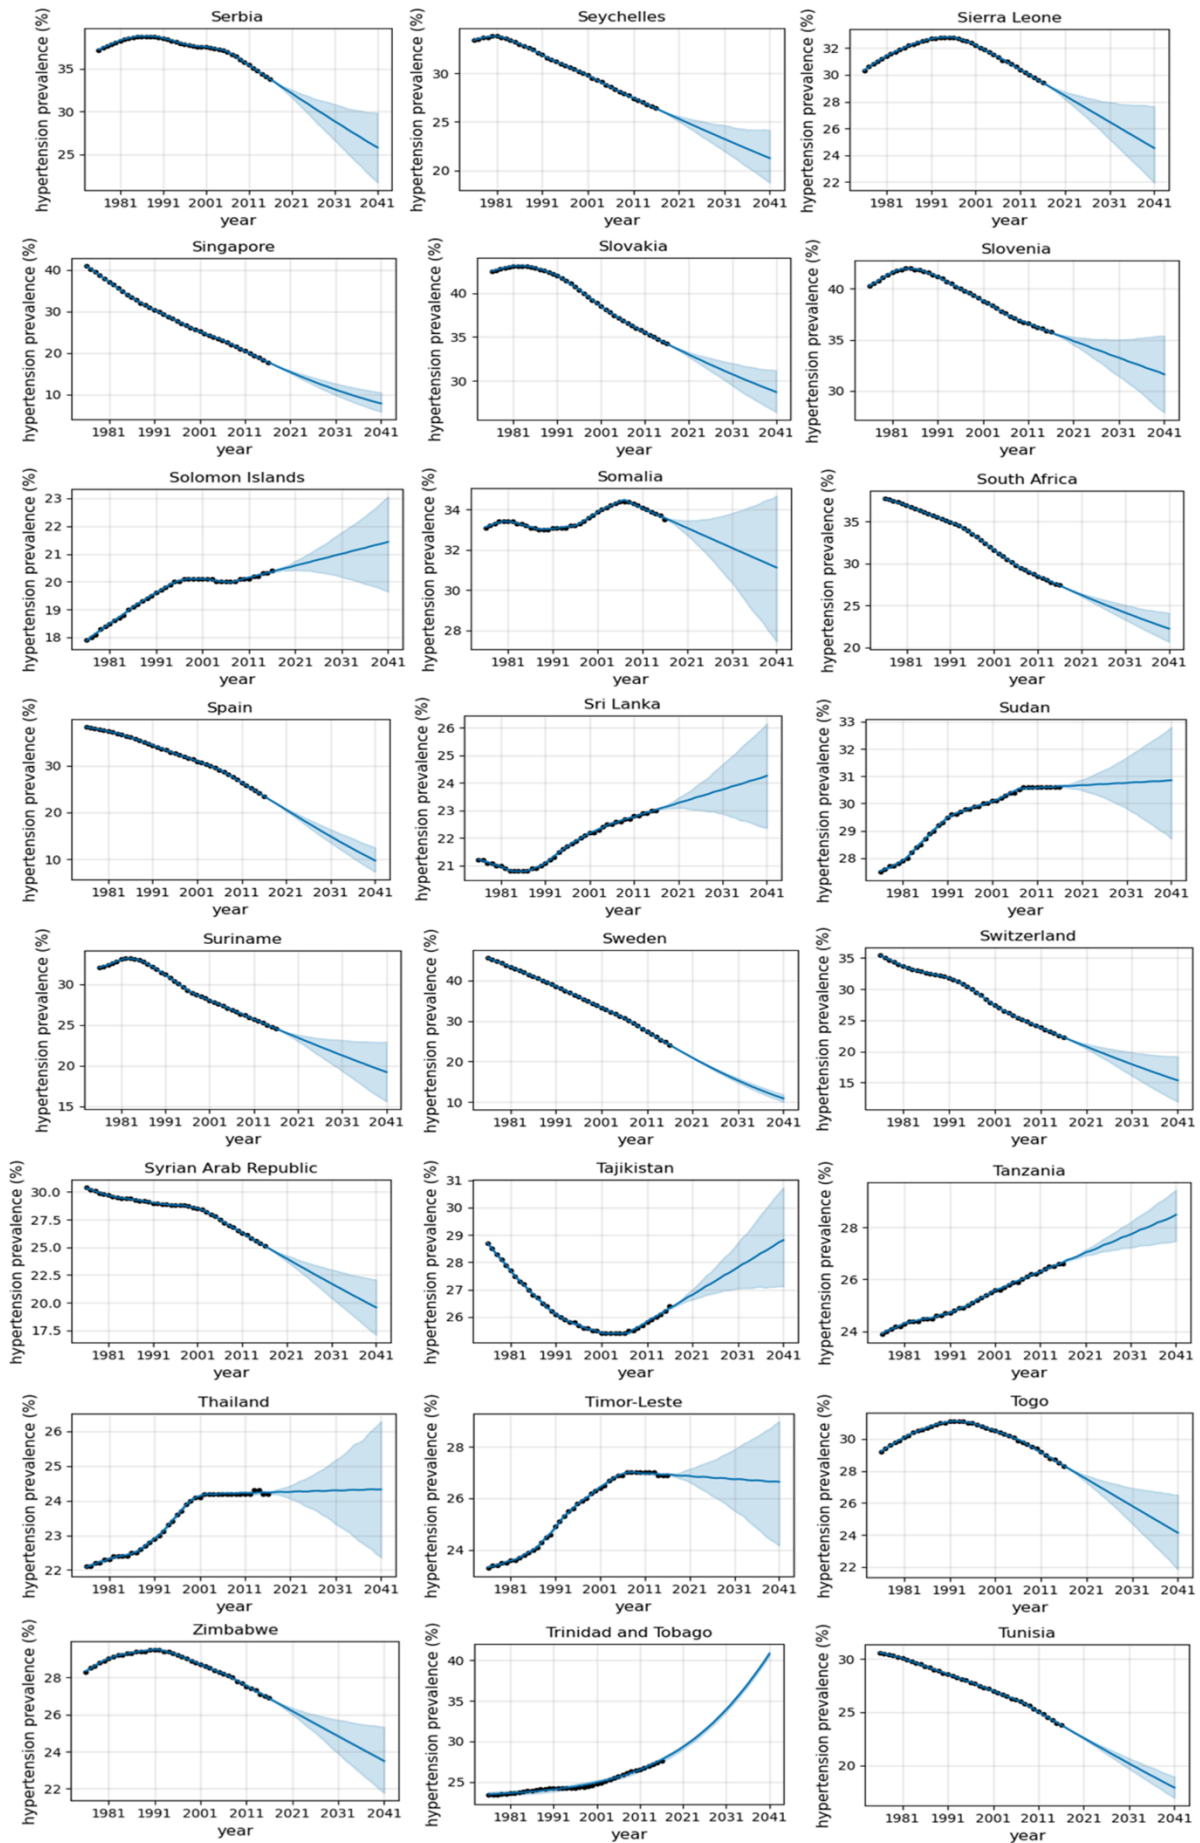

**Fig. A1g.** Plot of actual data (dotted) and fitted curve (95% CI) for hypertension prevalence (Male)

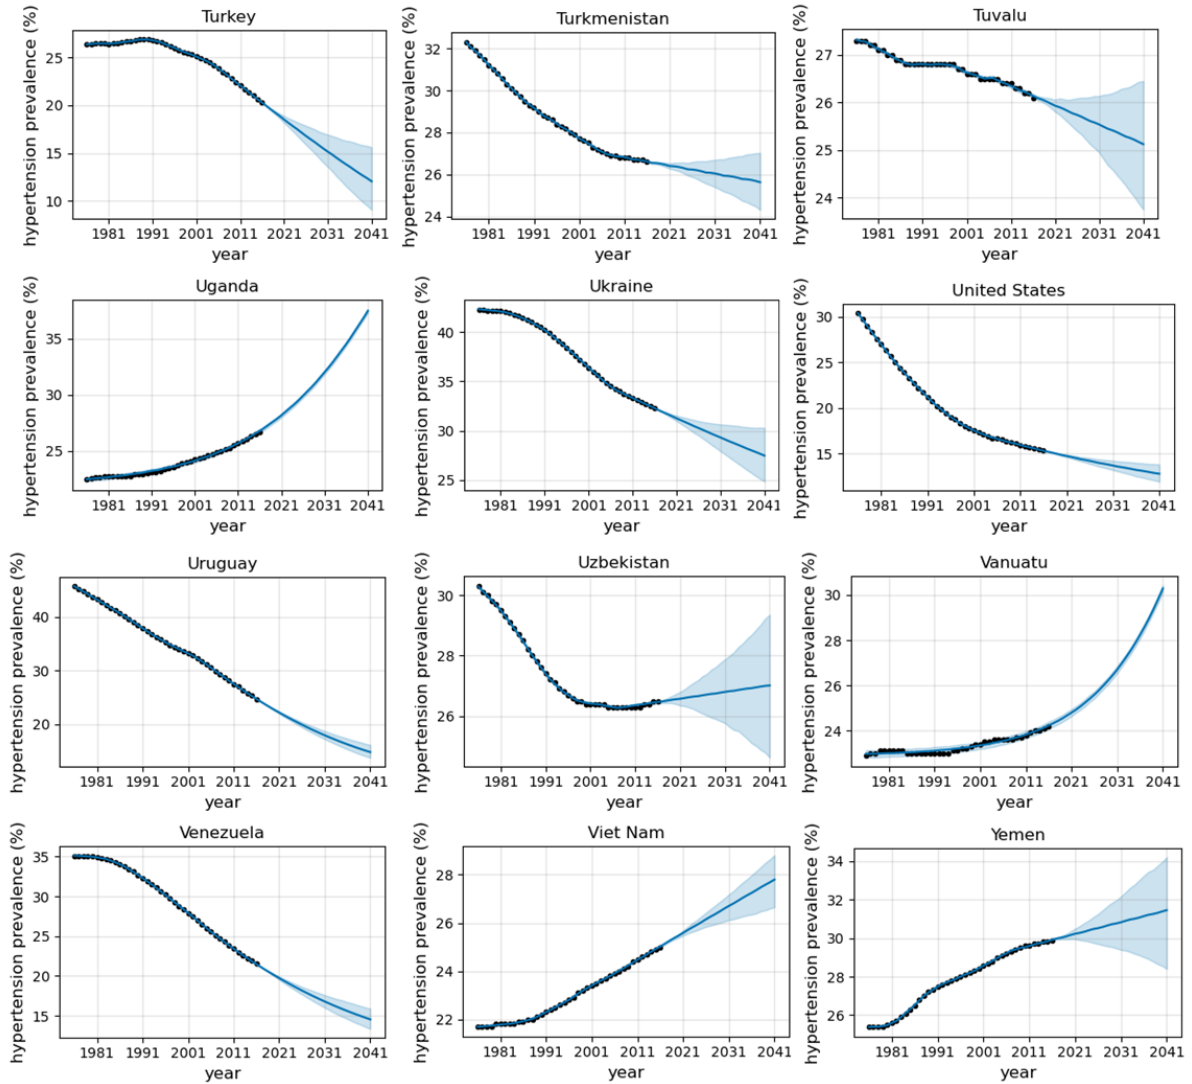

**Fig. A1h.** Plot of actual data (dotted) and fitted curve (95% CI) for hypertension prevalence (Male)

*A glimpse into the future: modelling global prevalence of hypertension*

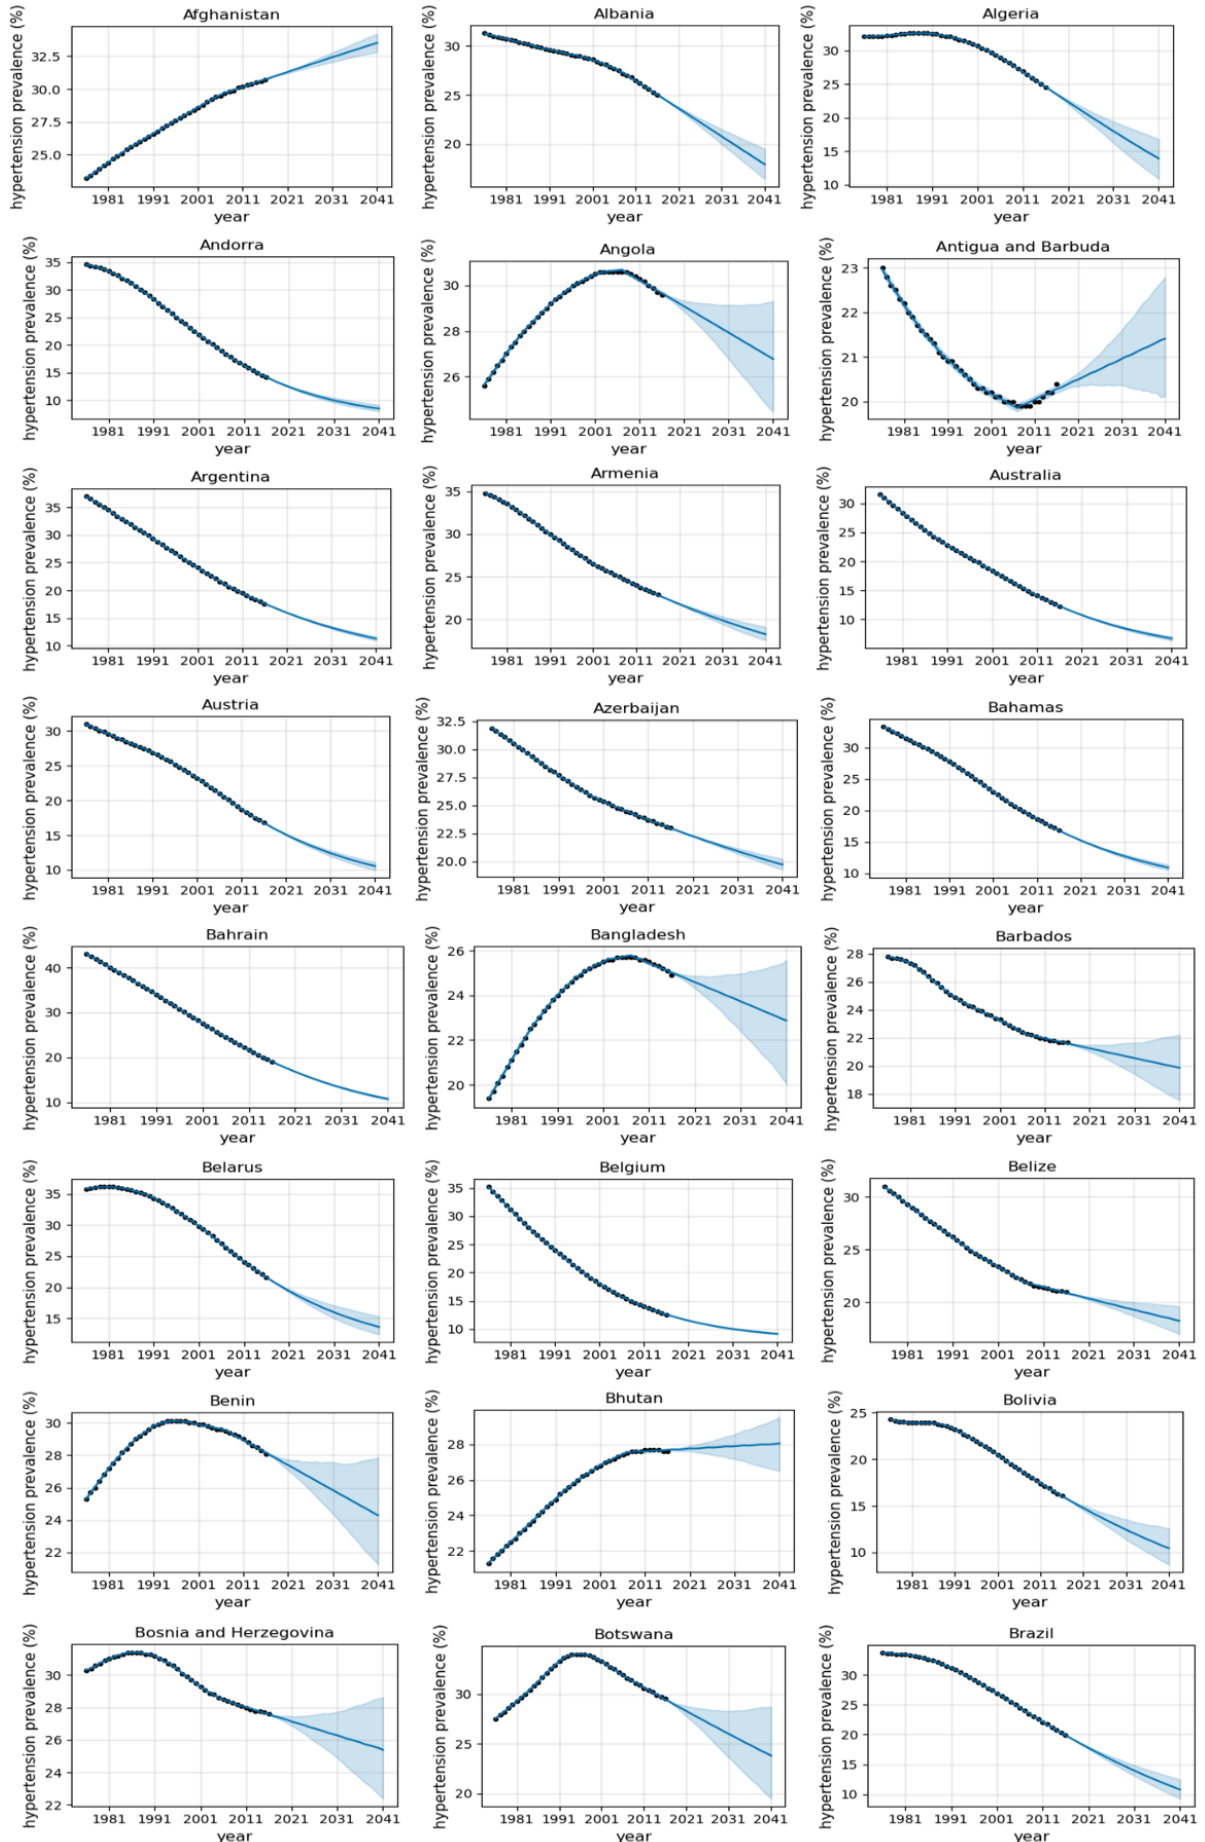

**Fig. A2a.** Plot of actual data (dotted) and fitted curve (95% CI) for hypertension prevalence (Female)

*A glimpse into the future: modelling global prevalence of hypertension*

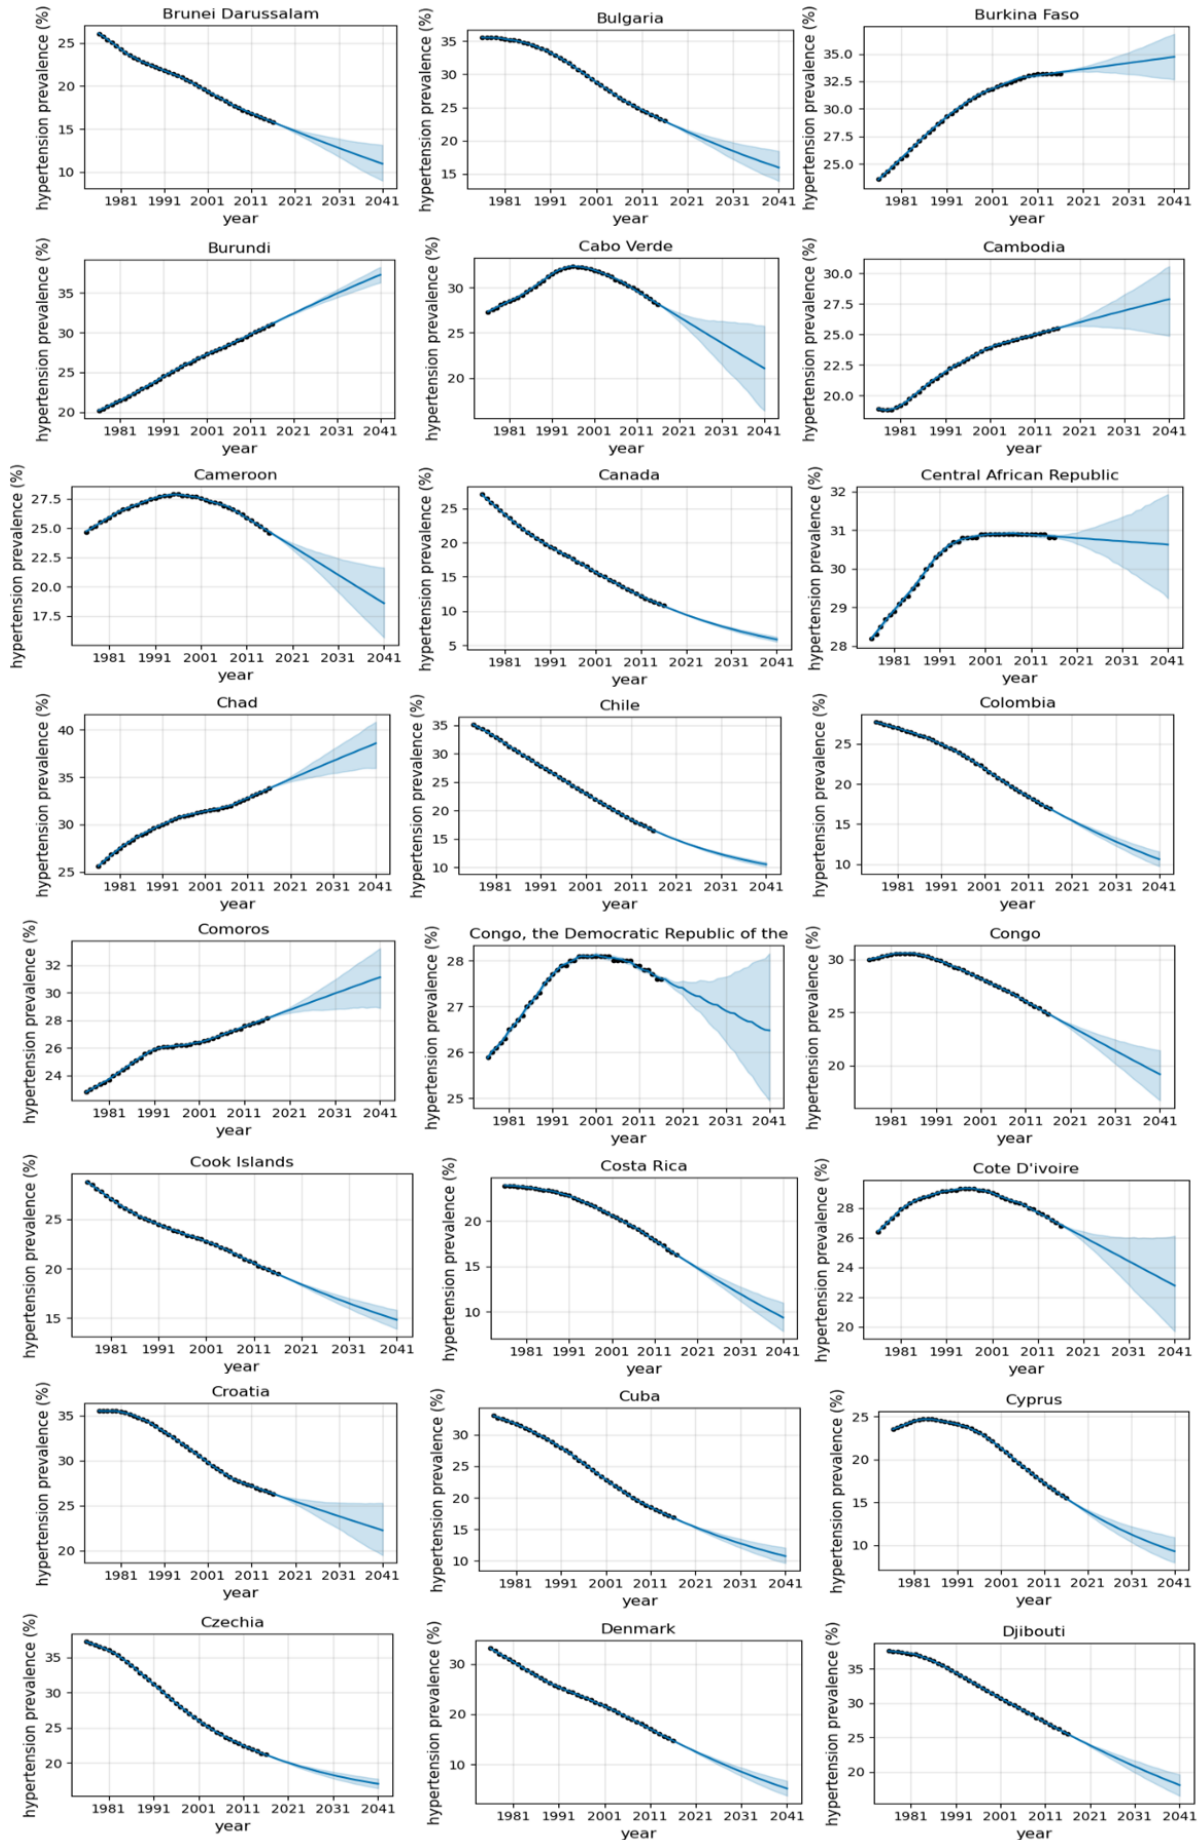

**Fig. A2b.** Plot of actual data (dotted) and fitted curve (95% CI) for hypertension prevalence (Female)

*A glimpse into the future: modelling global prevalence of hypertension*

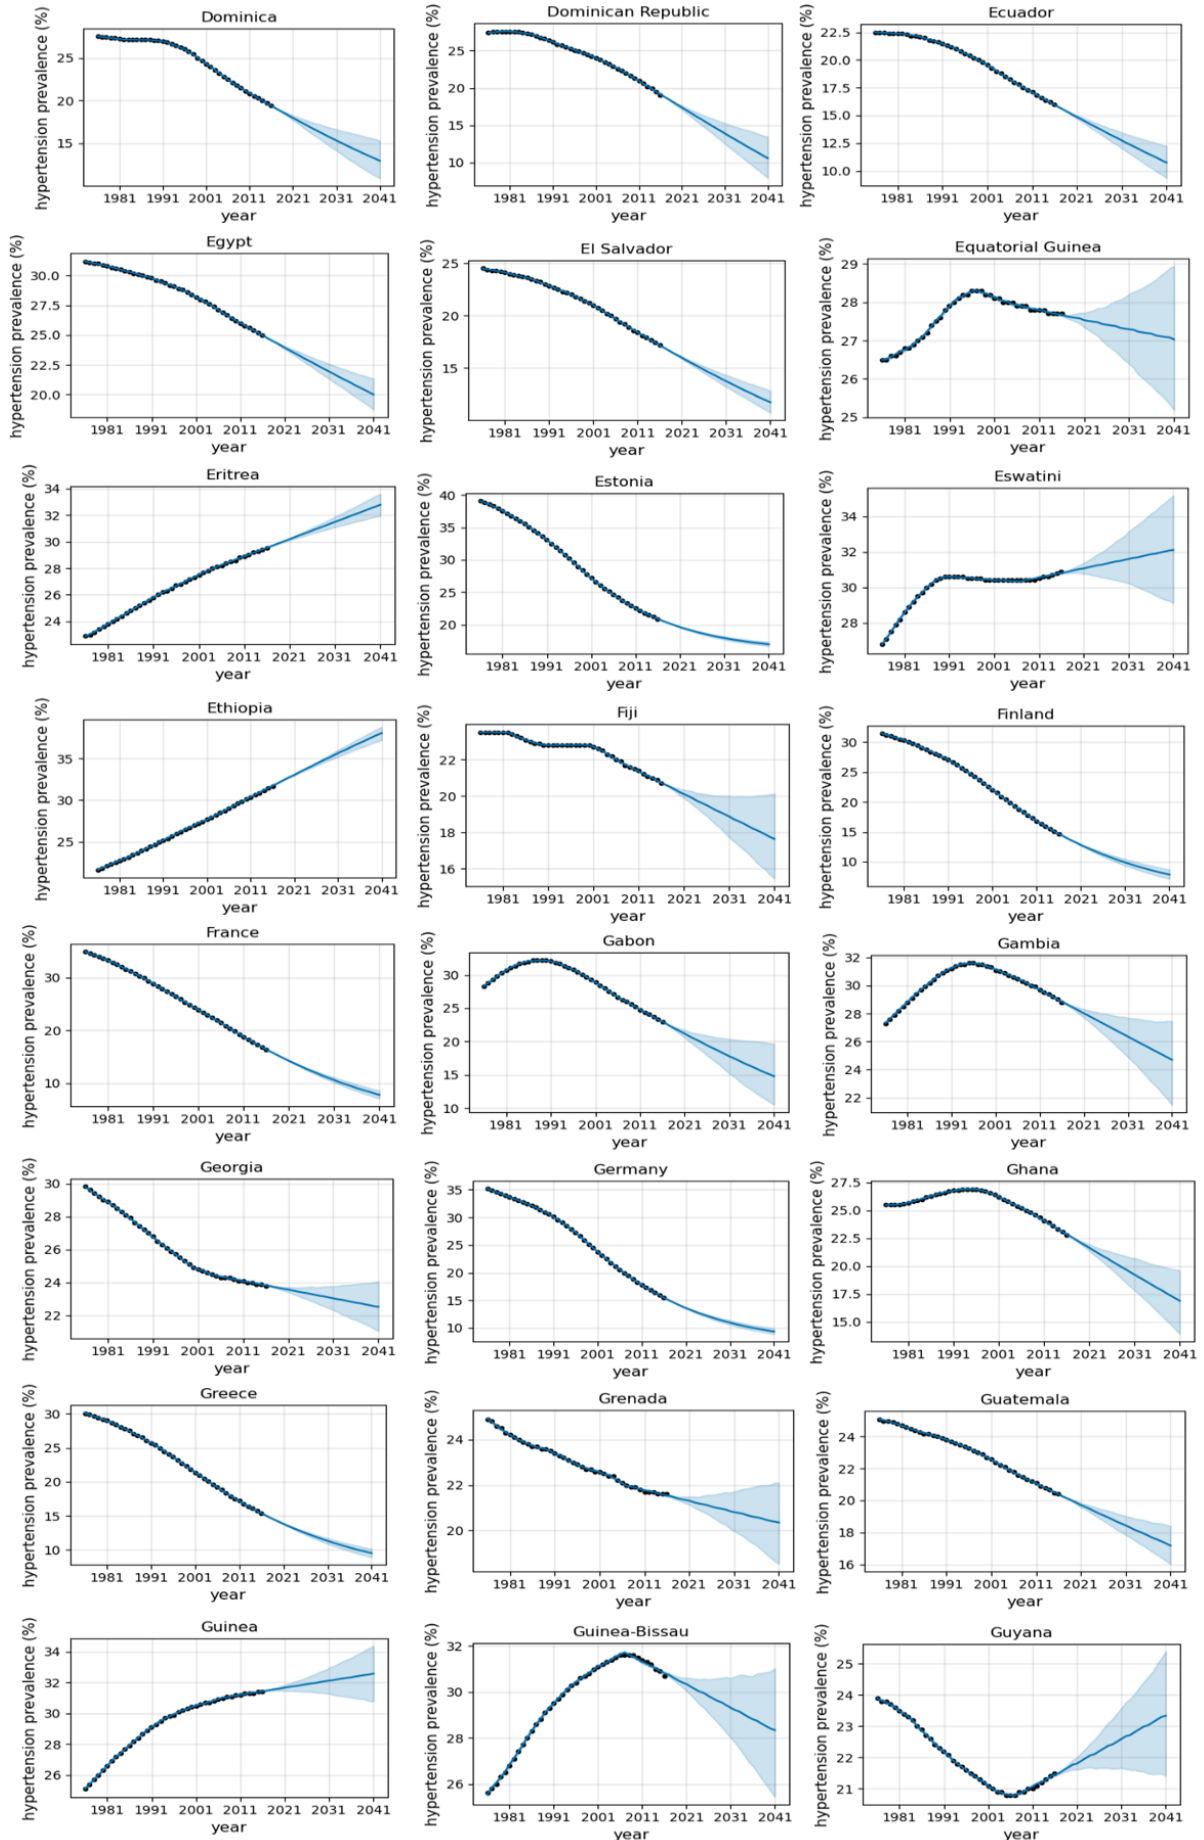

**Fig. A2c.** Plot of actual data (dotted) and fitted curve (95% CI) for hypertension prevalence (Female)

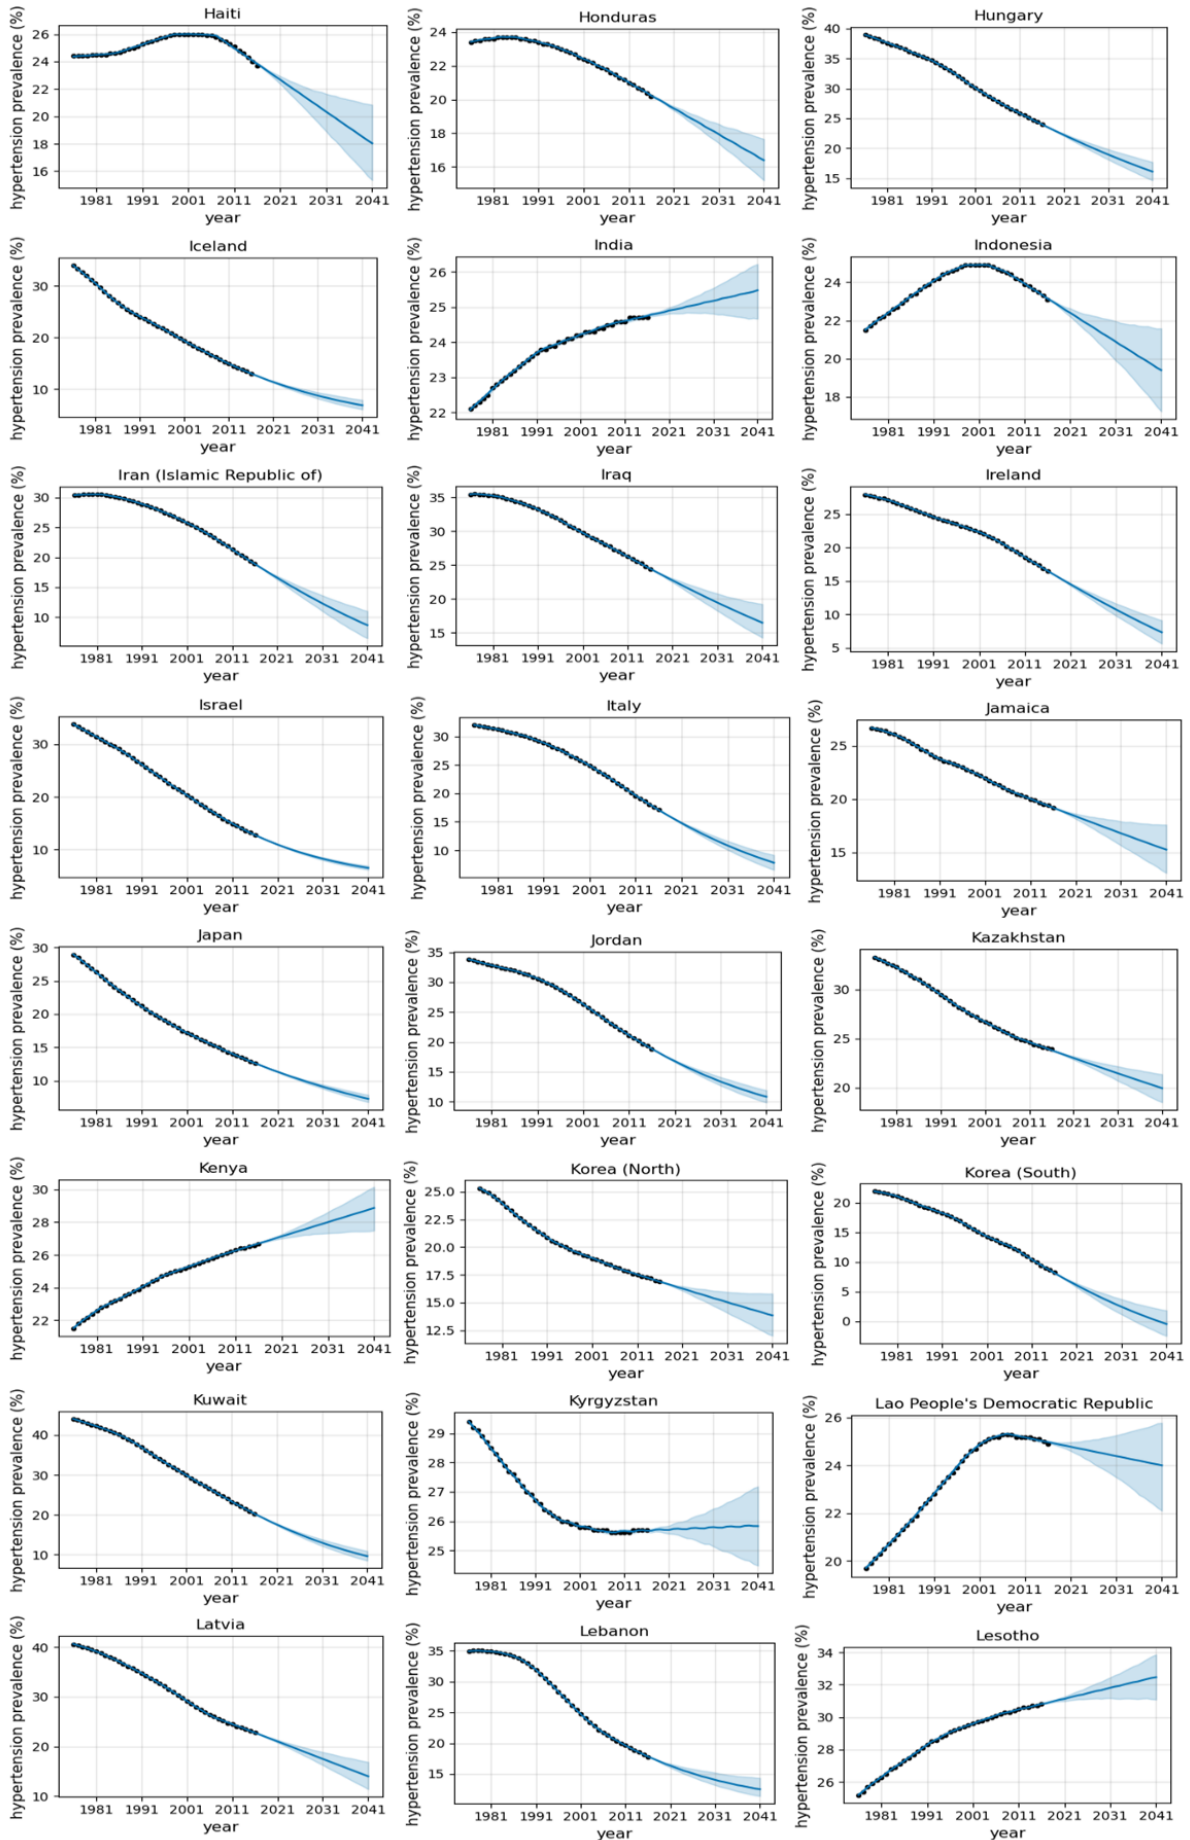

Fig. A2d. Plot of actual data (dotted) and fitted curve (95% CI) for hypertension prevalence (Female)

*A glimpse into the future: modelling global prevalence of hypertension*

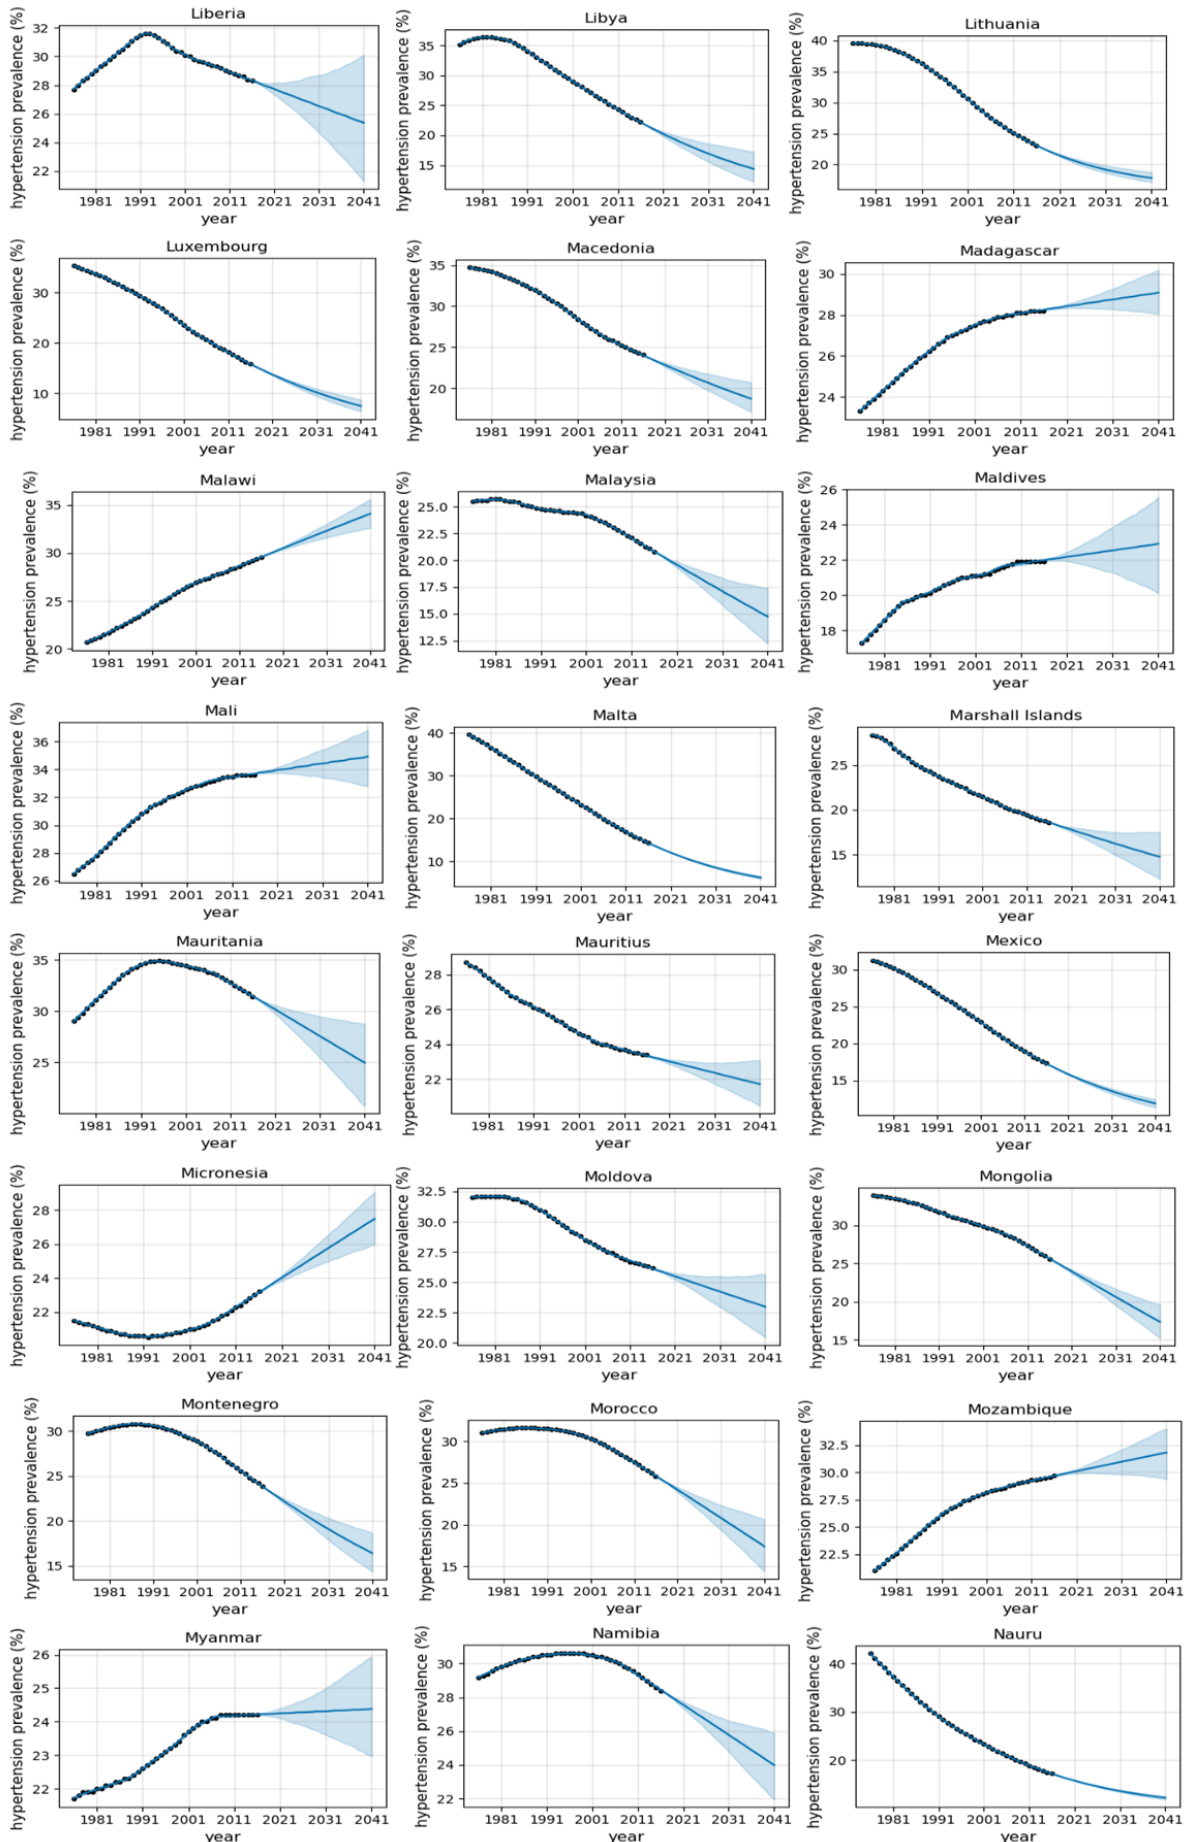

**Fig. A2e.** Plot of actual data (dotted) and fitted curve (95% CI) for hypertension prevalence (Female)



*A glimpse into the future: modelling global prevalence of hypertension*

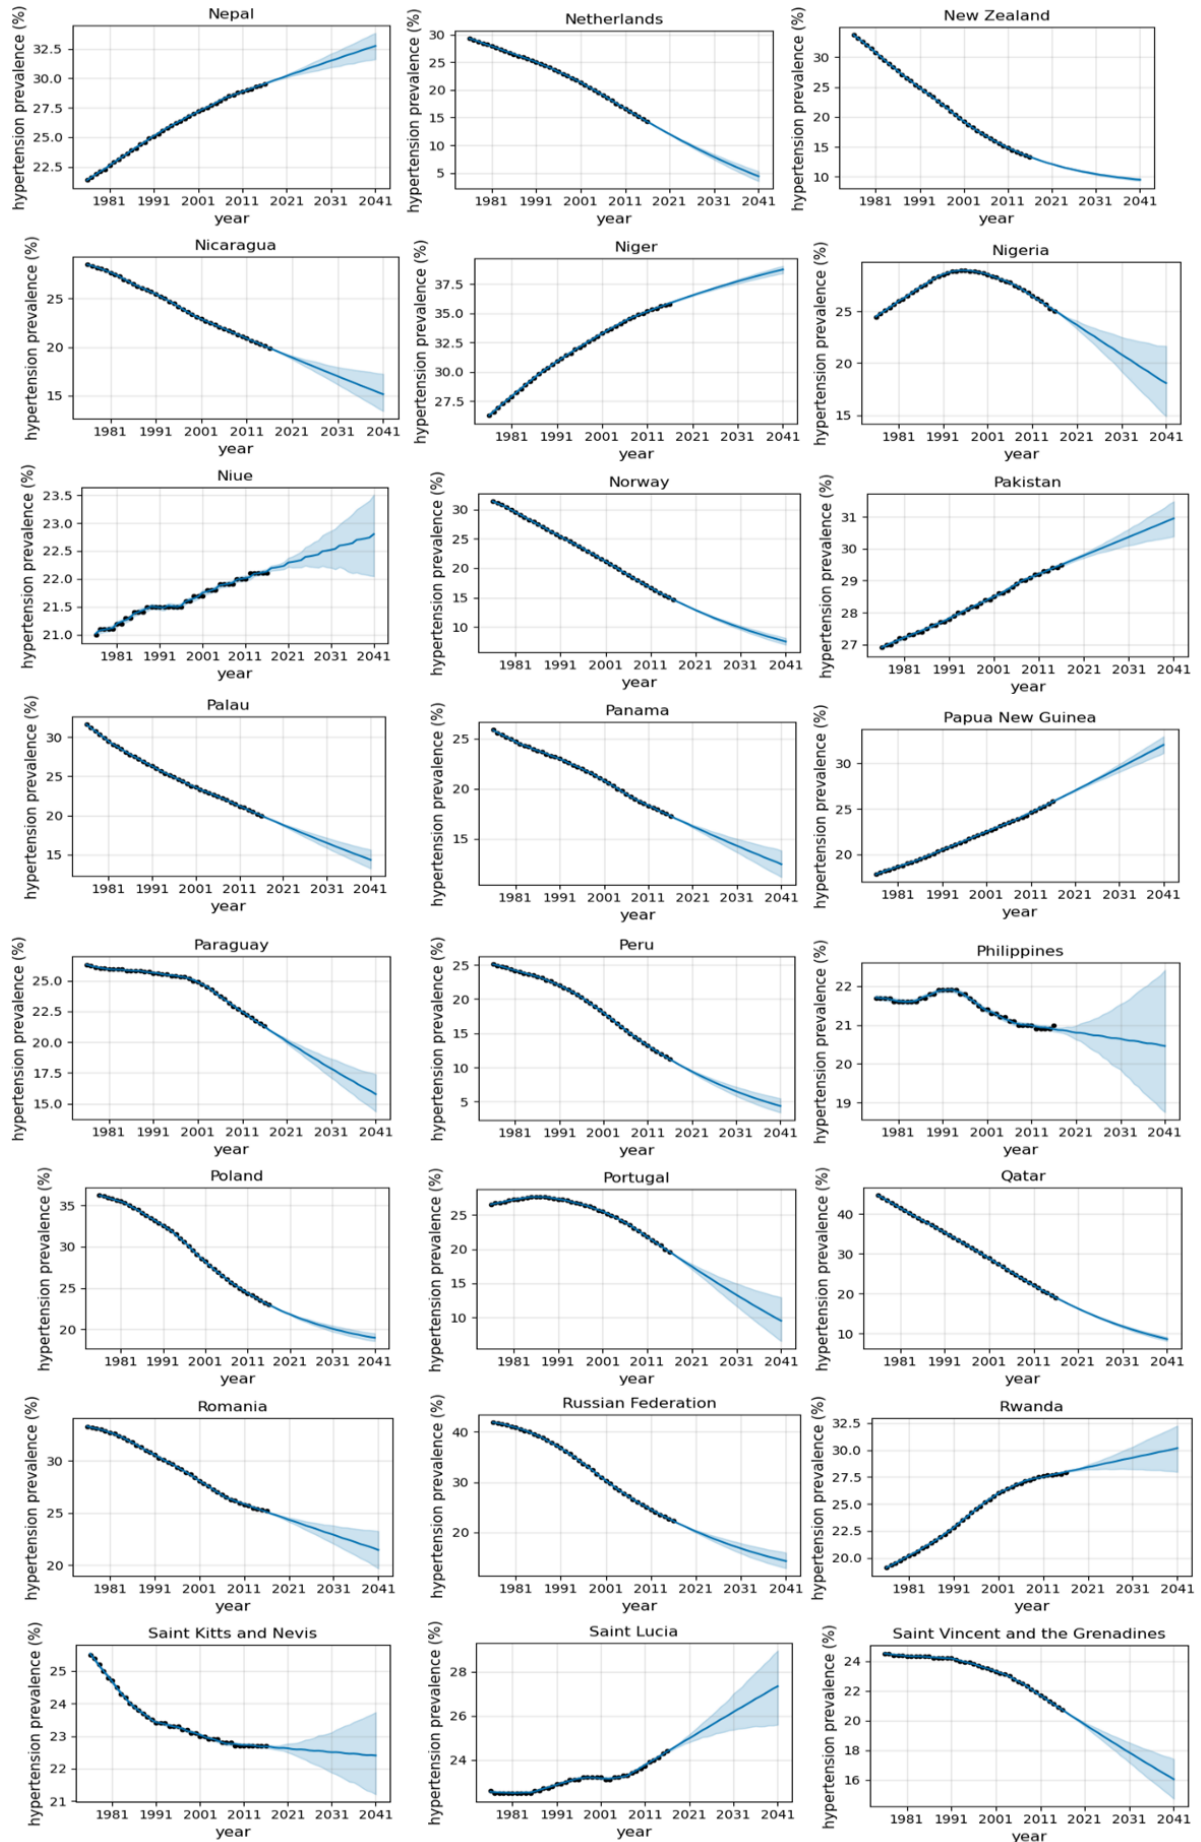

**Fig. A2f.** Plot of actual data (dotted) and fitted curve (95% CI) for hypertension prevalence (Female)

*A glimpse into the future: modelling global prevalence of hypertension*

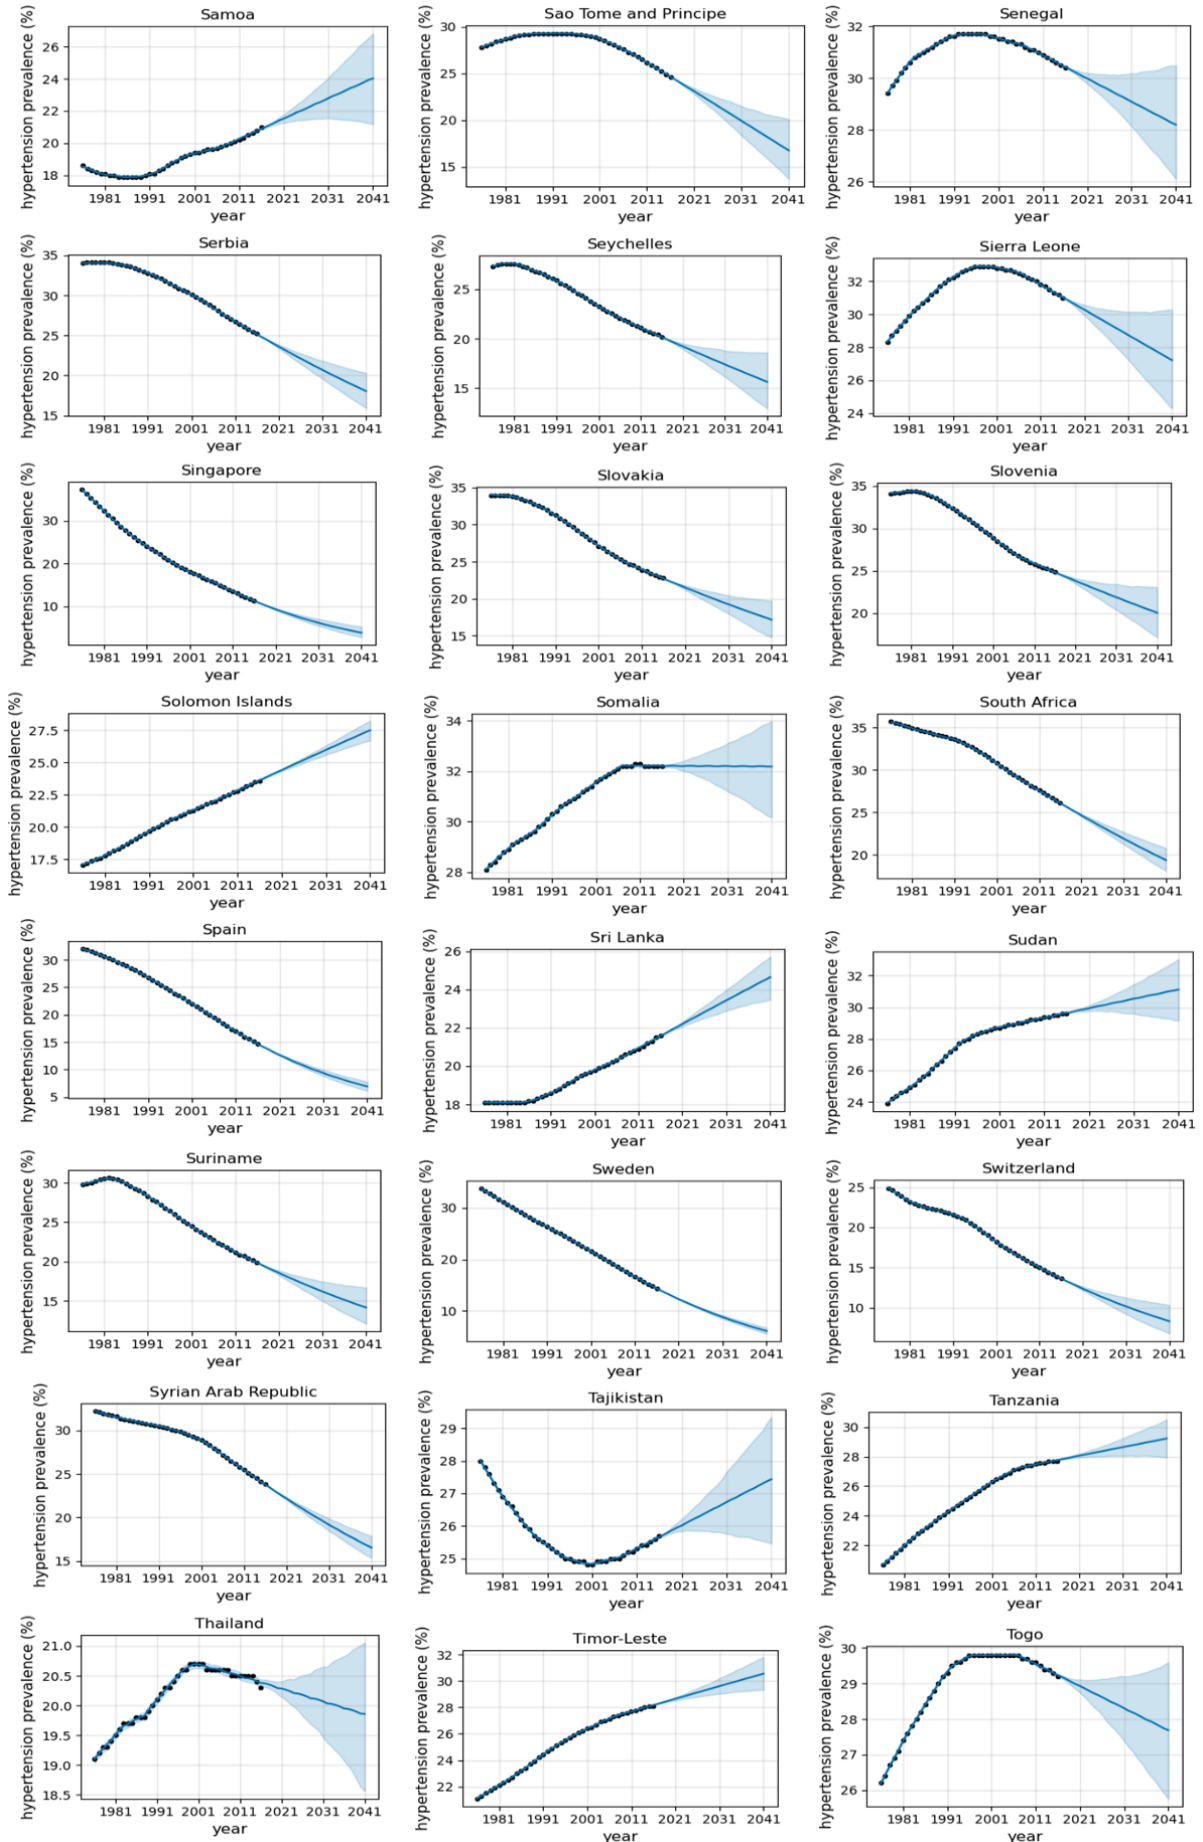

**Fig. A2g.** Plot of actual data (dotted) and fitted curve (95% CI) for hypertension prevalence (Female)

*A glimpse into the future: modelling global prevalence of hypertension*

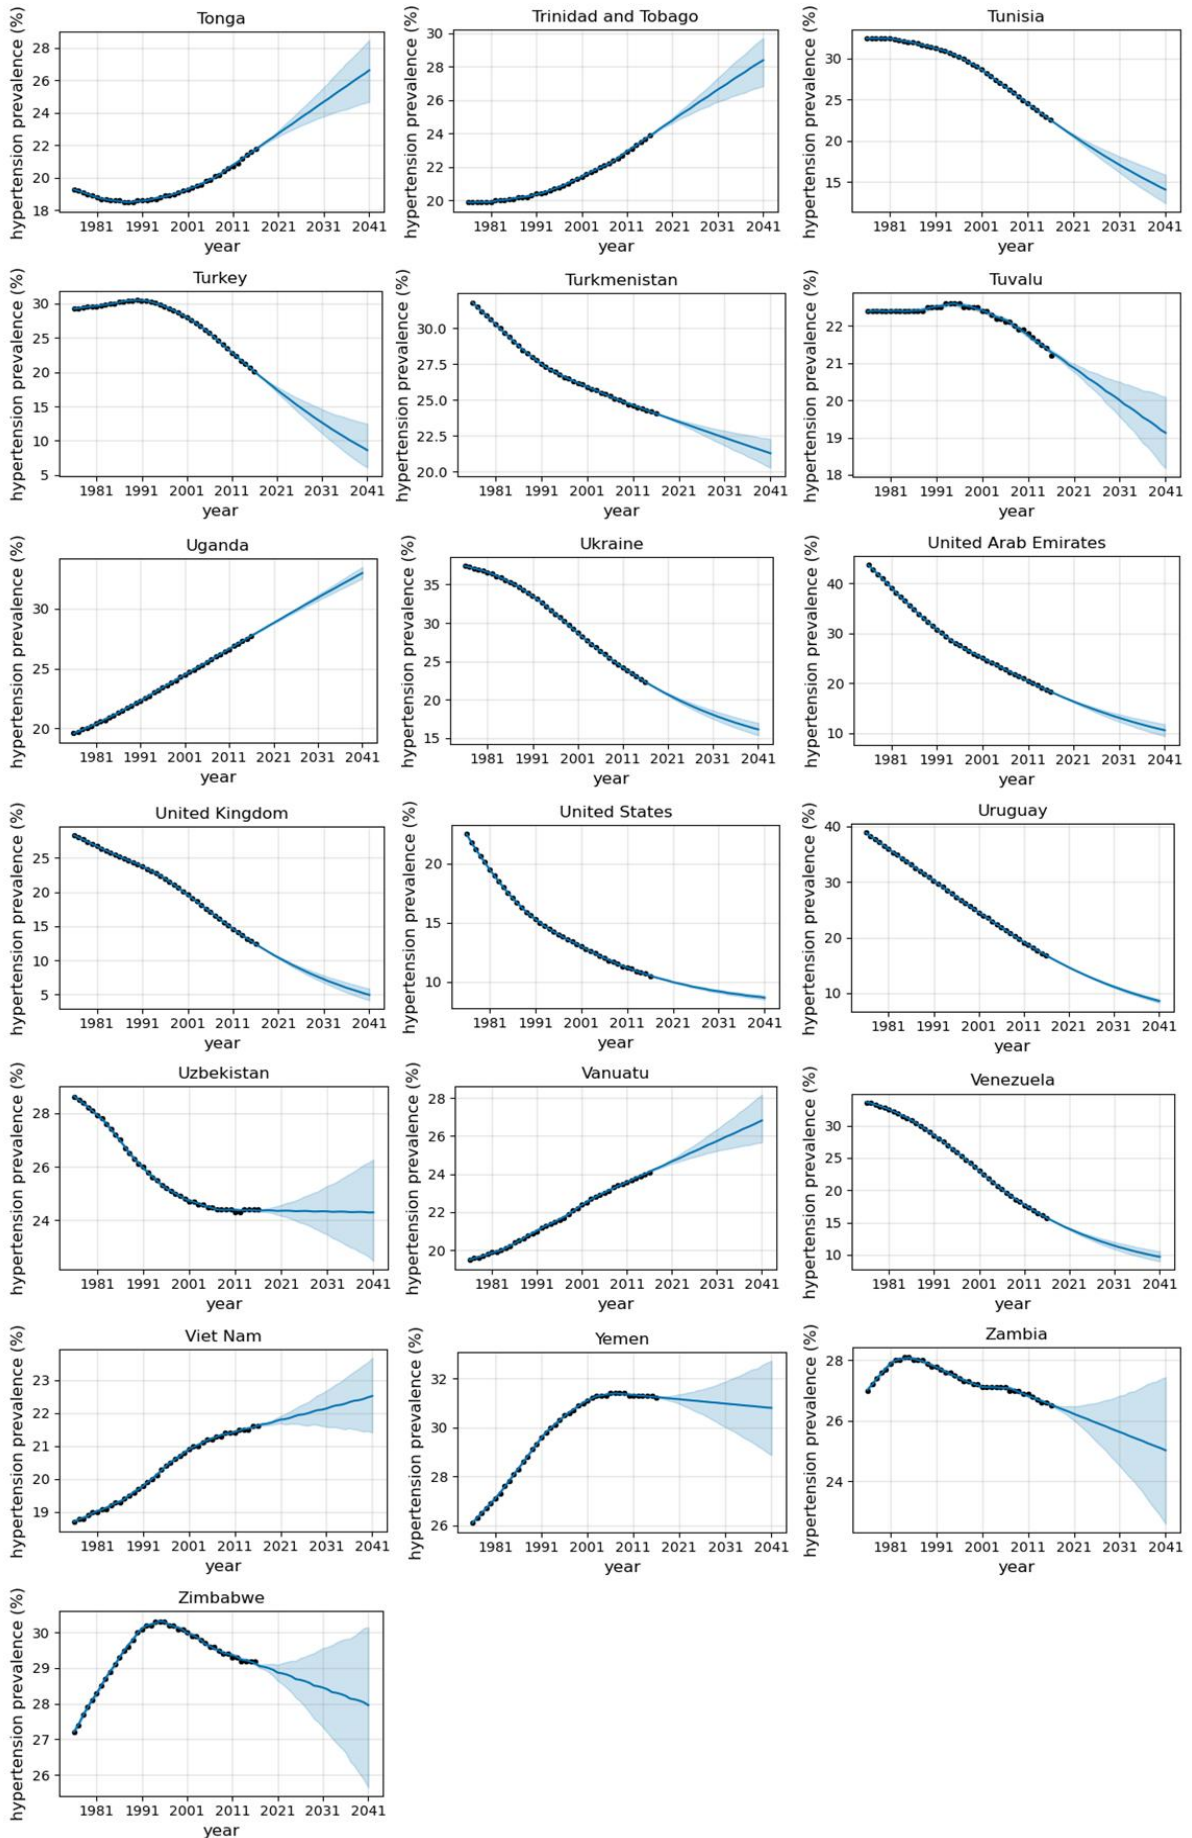

**Fig. A2h.** Plot of actual data (dotted) and fitted curve (95% CI) for hypertension prevalence (Female)

*A glimpse into the future: modelling global prevalence of hypertension*

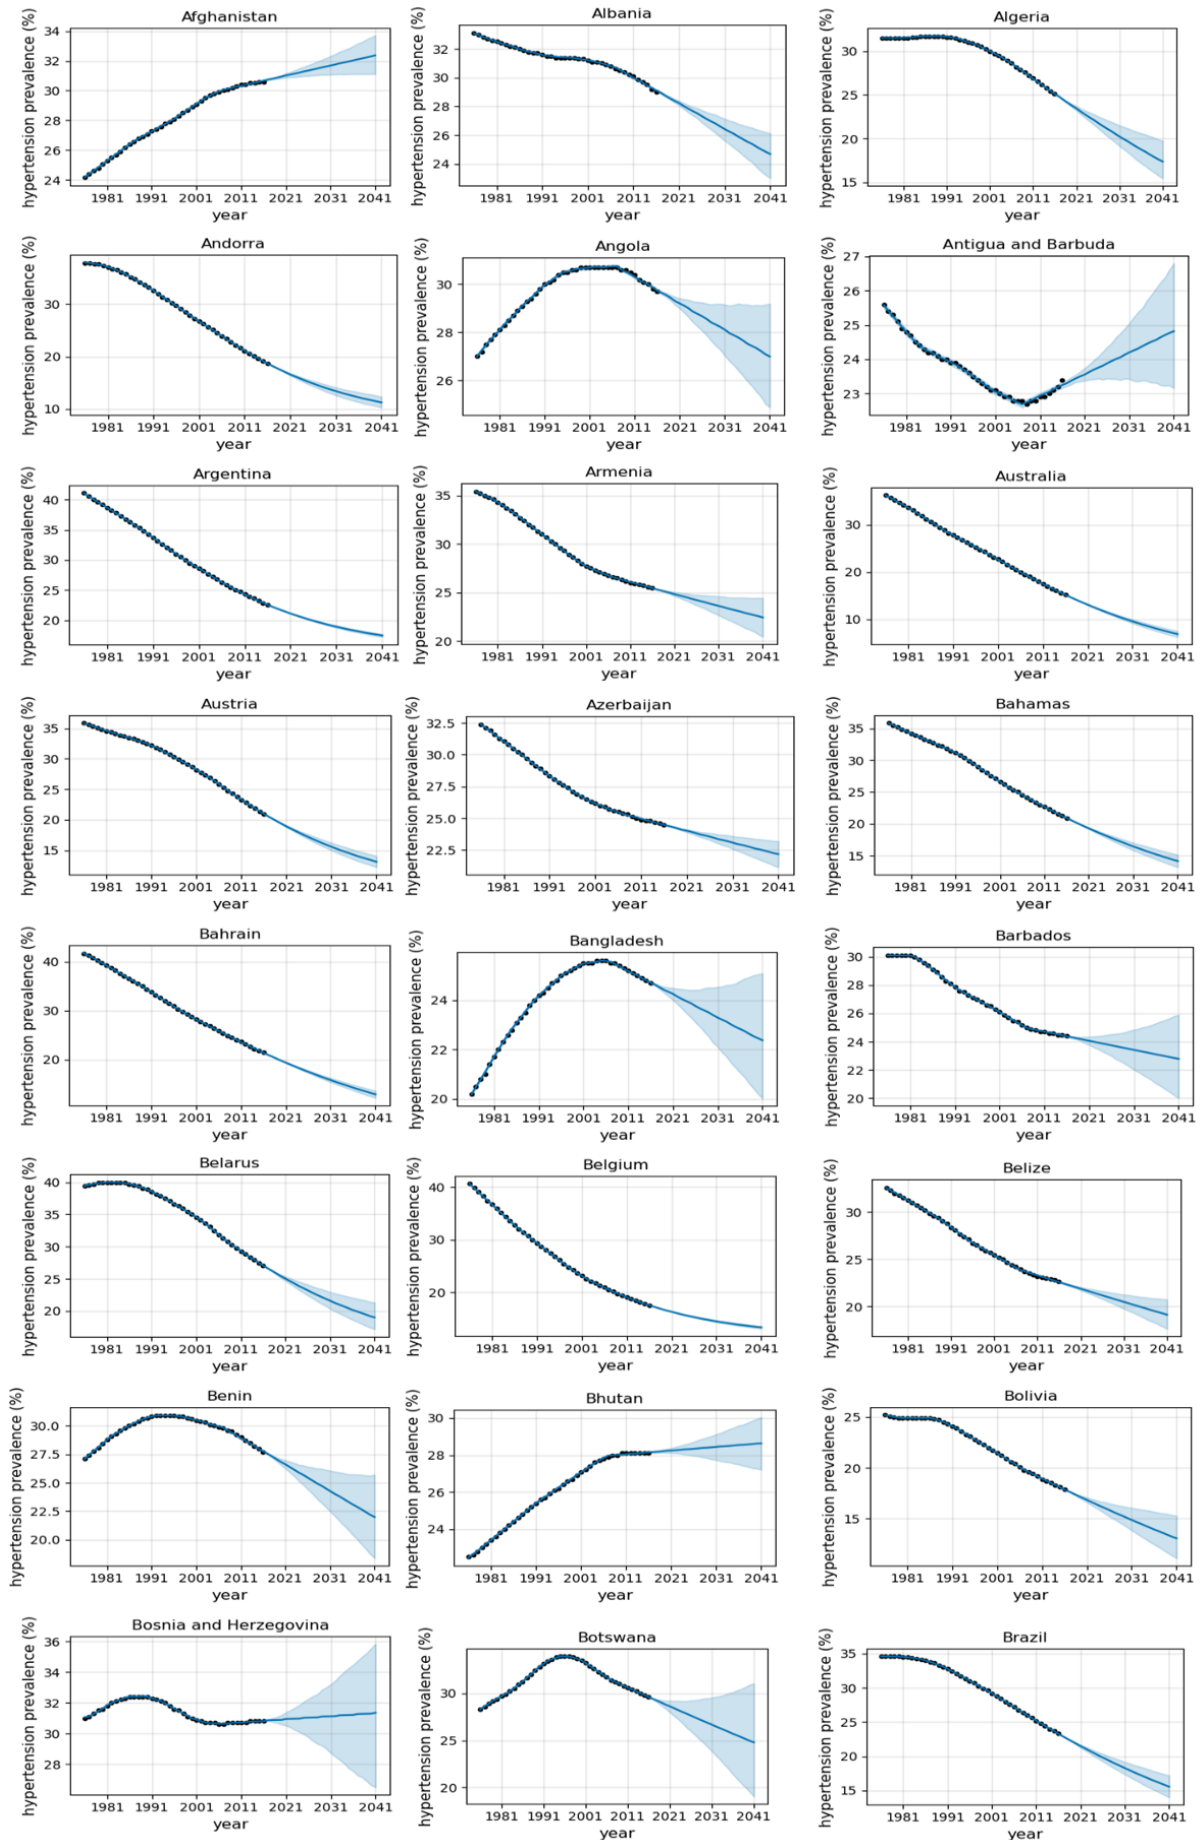

**Fig. A3a.** Plot of actual data (dotted) and fitted curve (95% CI) for hypertension prevalence (Both)

*A glimpse into the future: modelling global prevalence of hypertension*

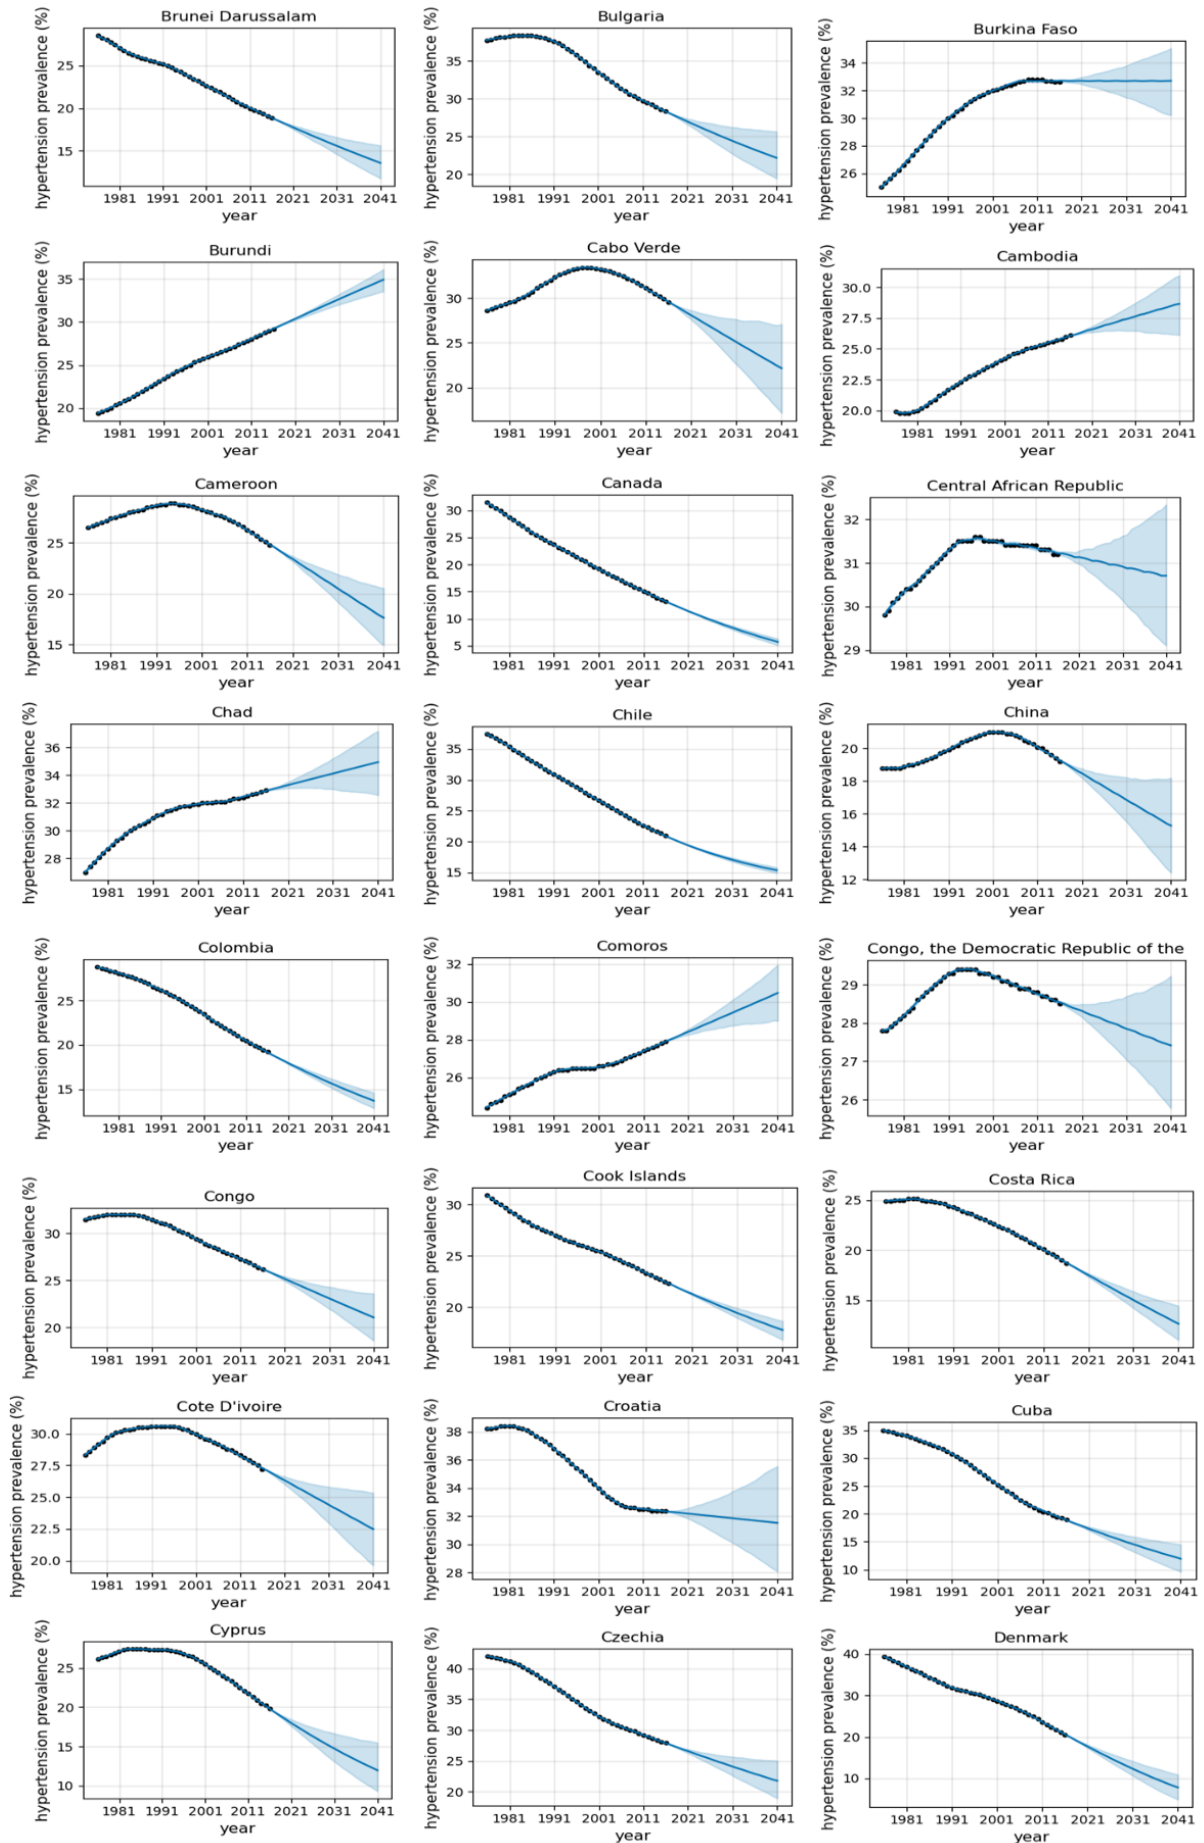

**Fig. A3b.** Plot of actual data (dotted) and fitted curve (95% CI) for hypertension prevalence (Both)

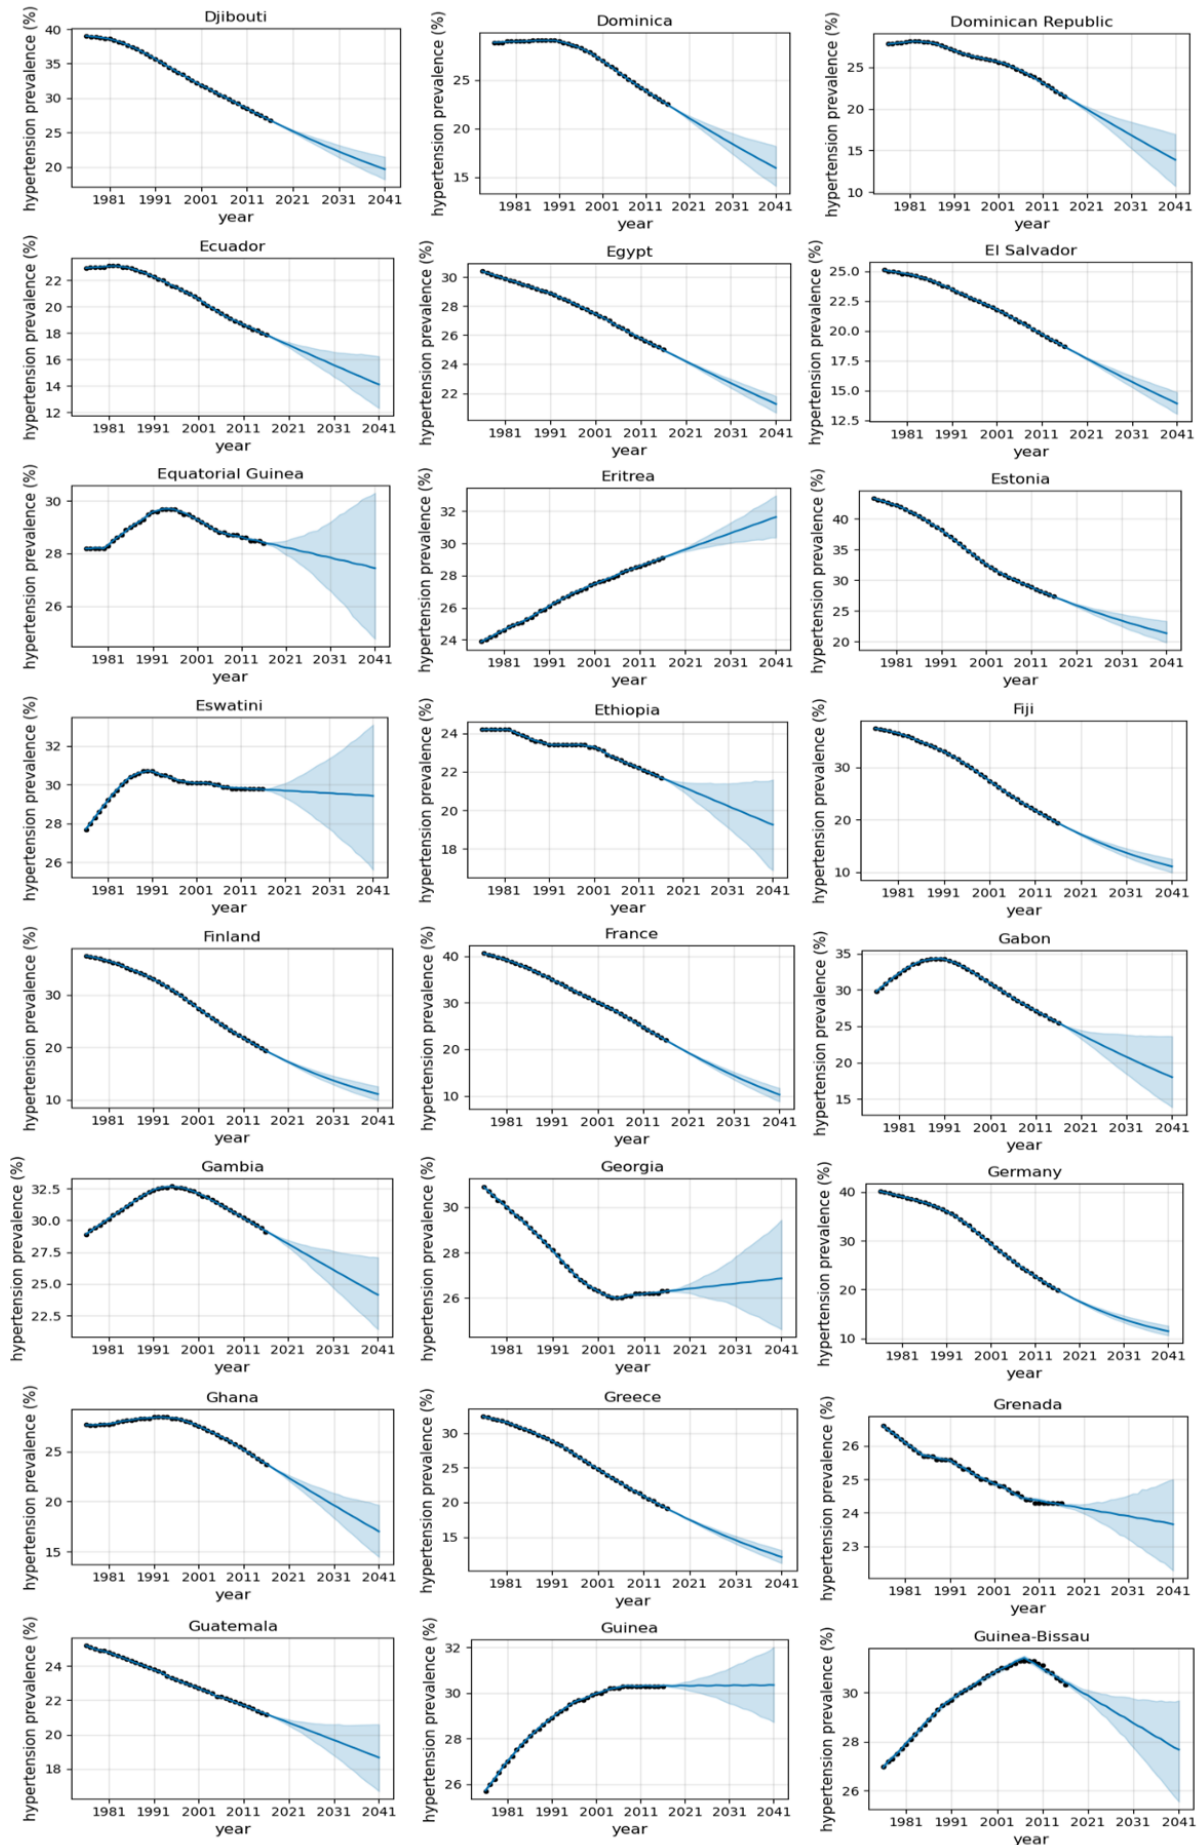

Fig. A3c. Plot of actual data (dotted) and fitted curve (95% CI) for hypertension prevalence (Both)

*A glimpse into the future: modelling global prevalence of hypertension*

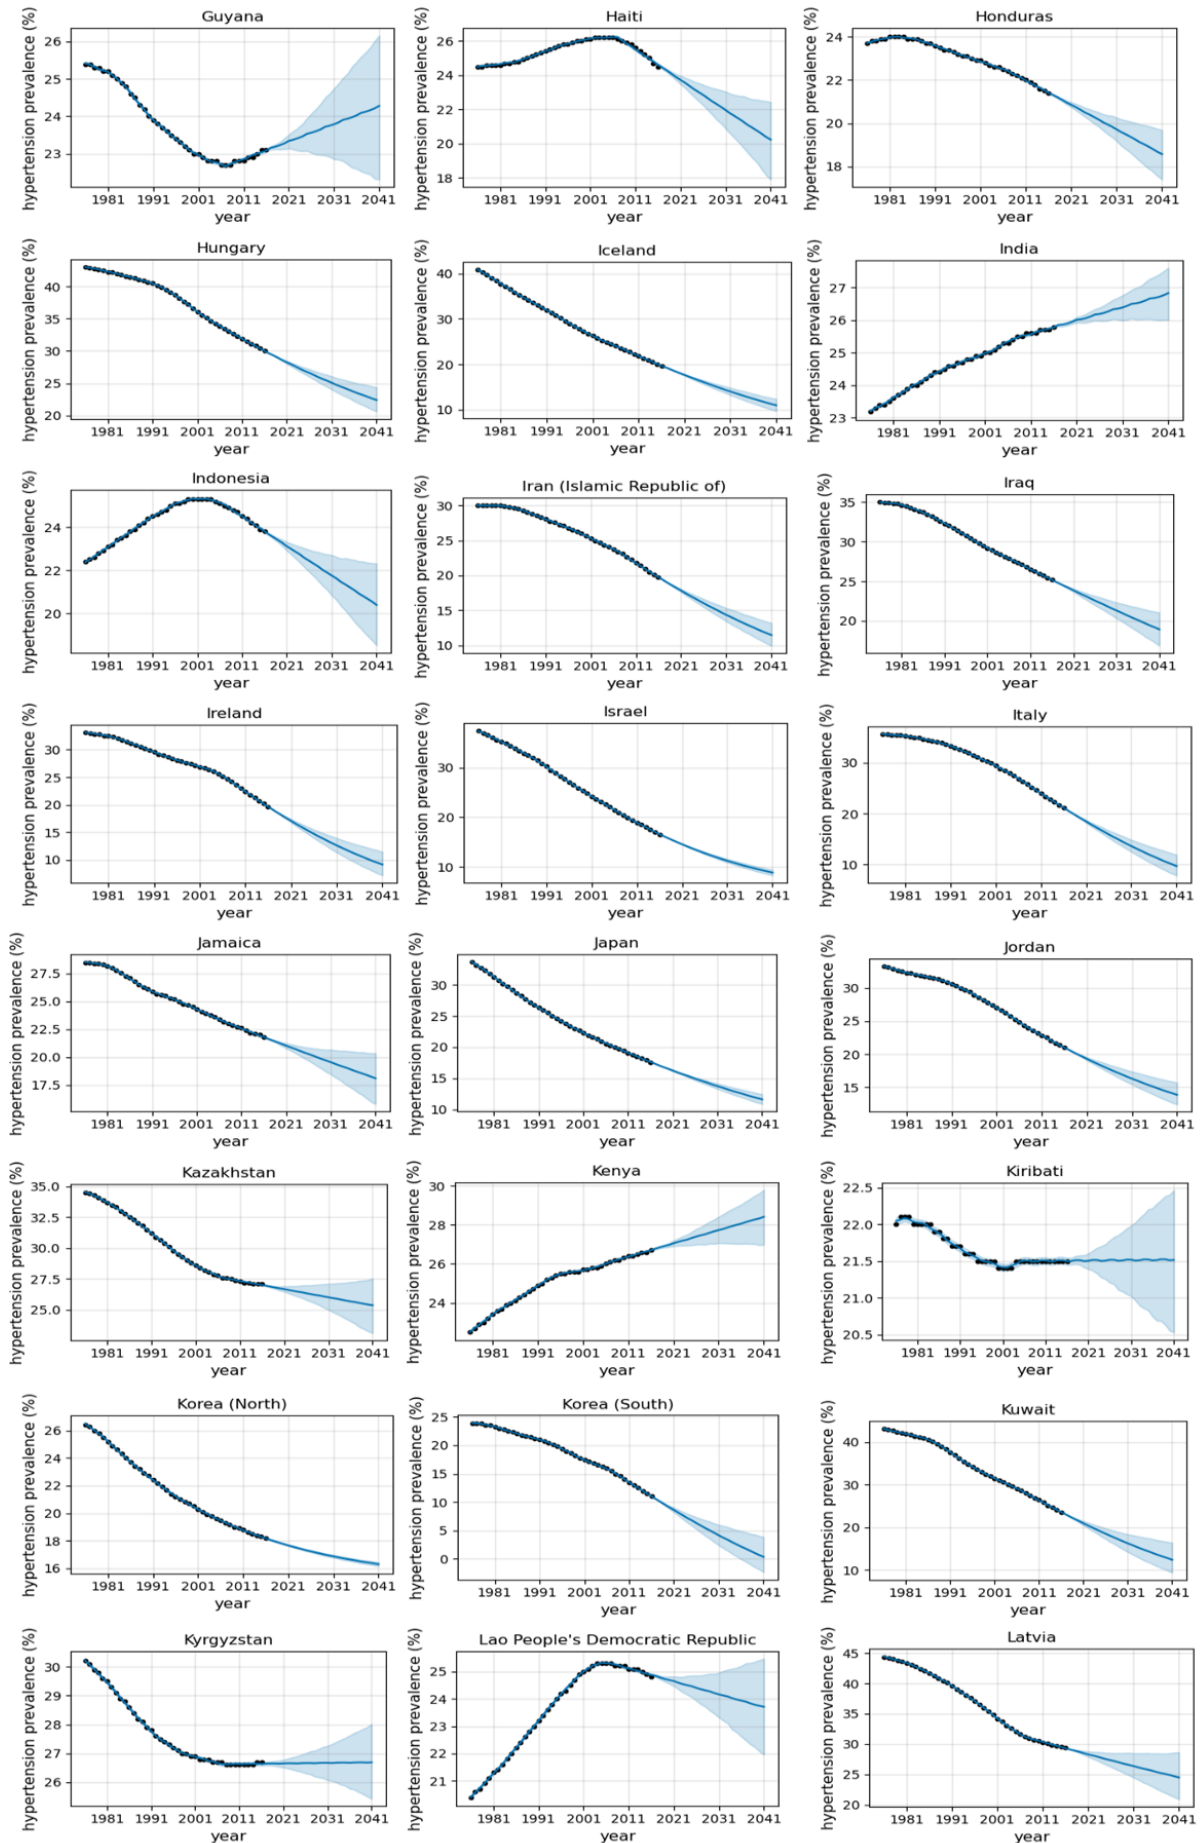

**Fig. A3d.** Plot of actual data (dotted) and fitted curve (95% CI) for hypertension prevalence (Both)

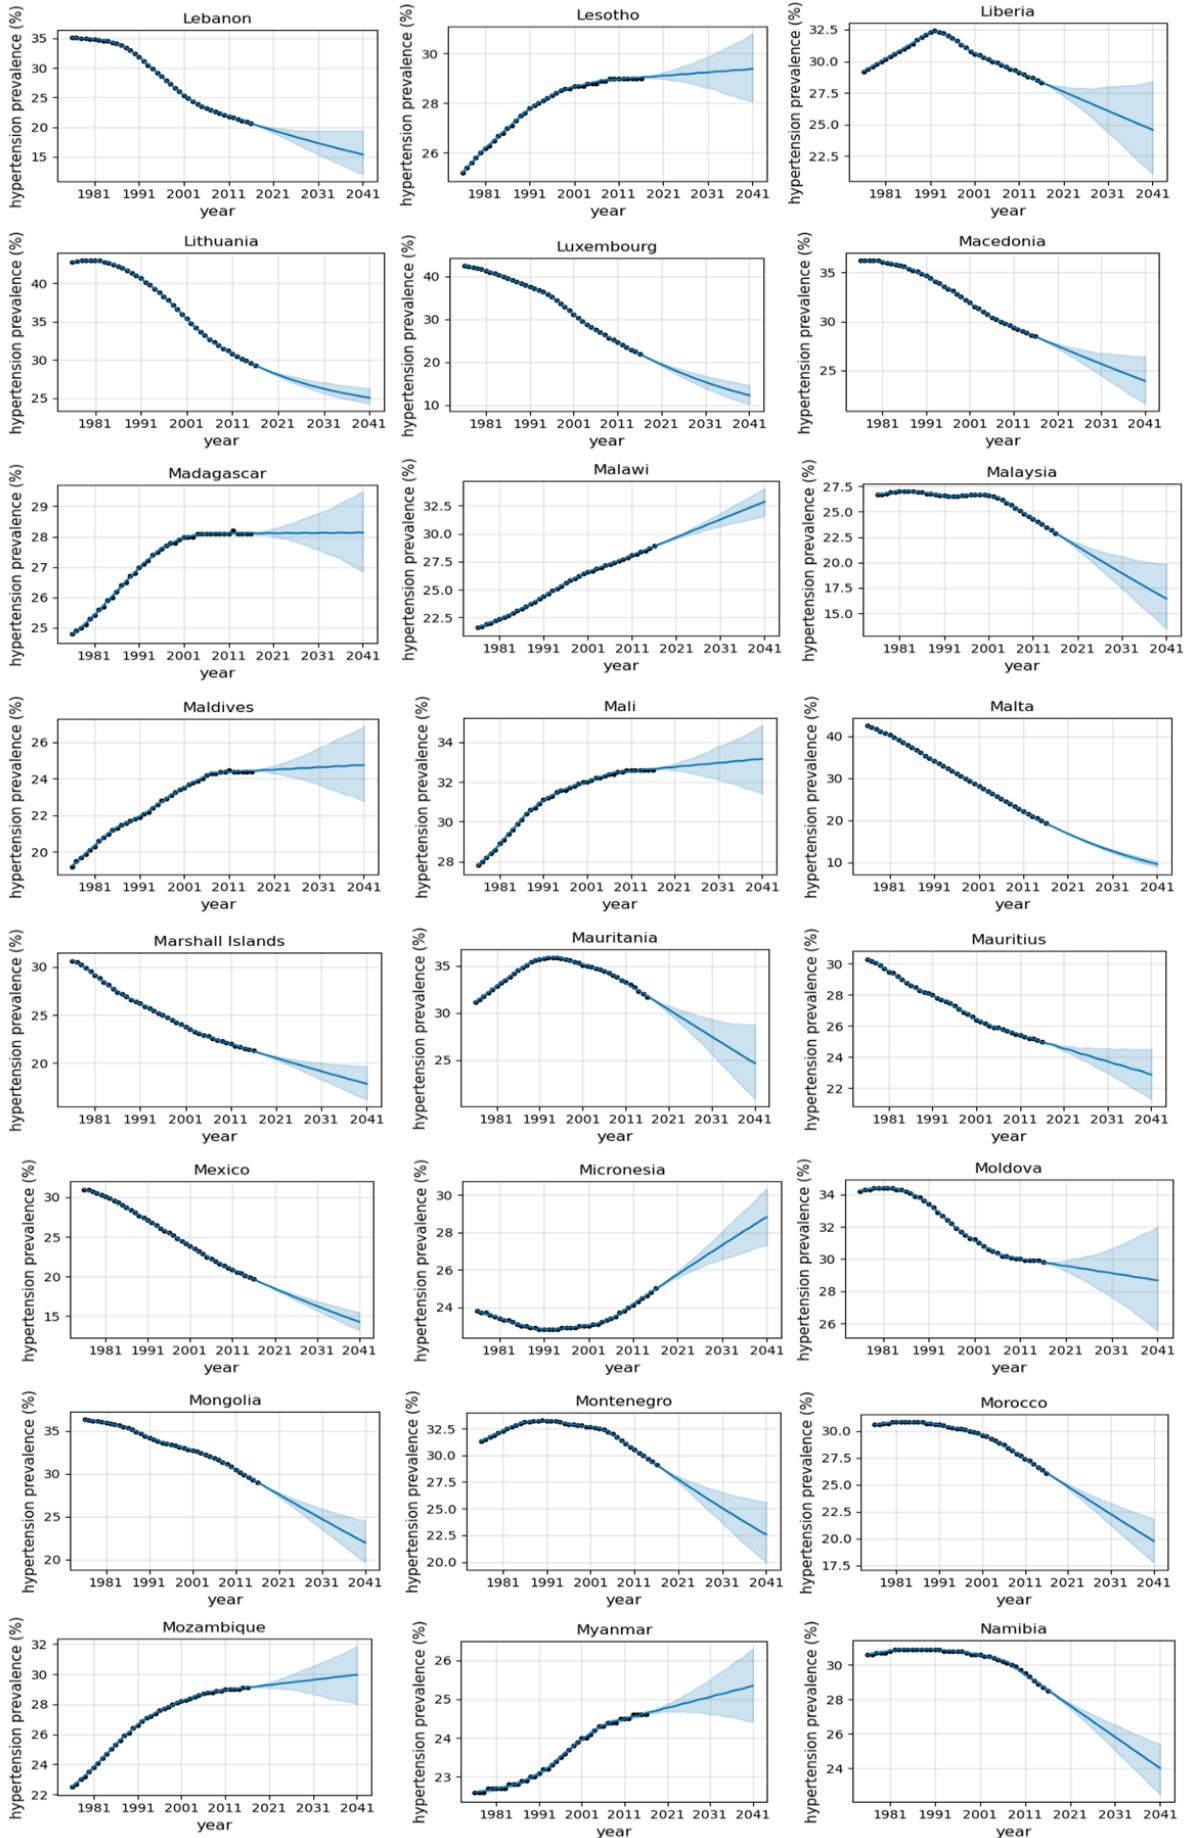

Fig. A3e. Plot of actual data (dotted) and fitted curve (95% CI) for hypertension prevalence (Both)



*A glimpse into the future: modelling global prevalence of hypertension*

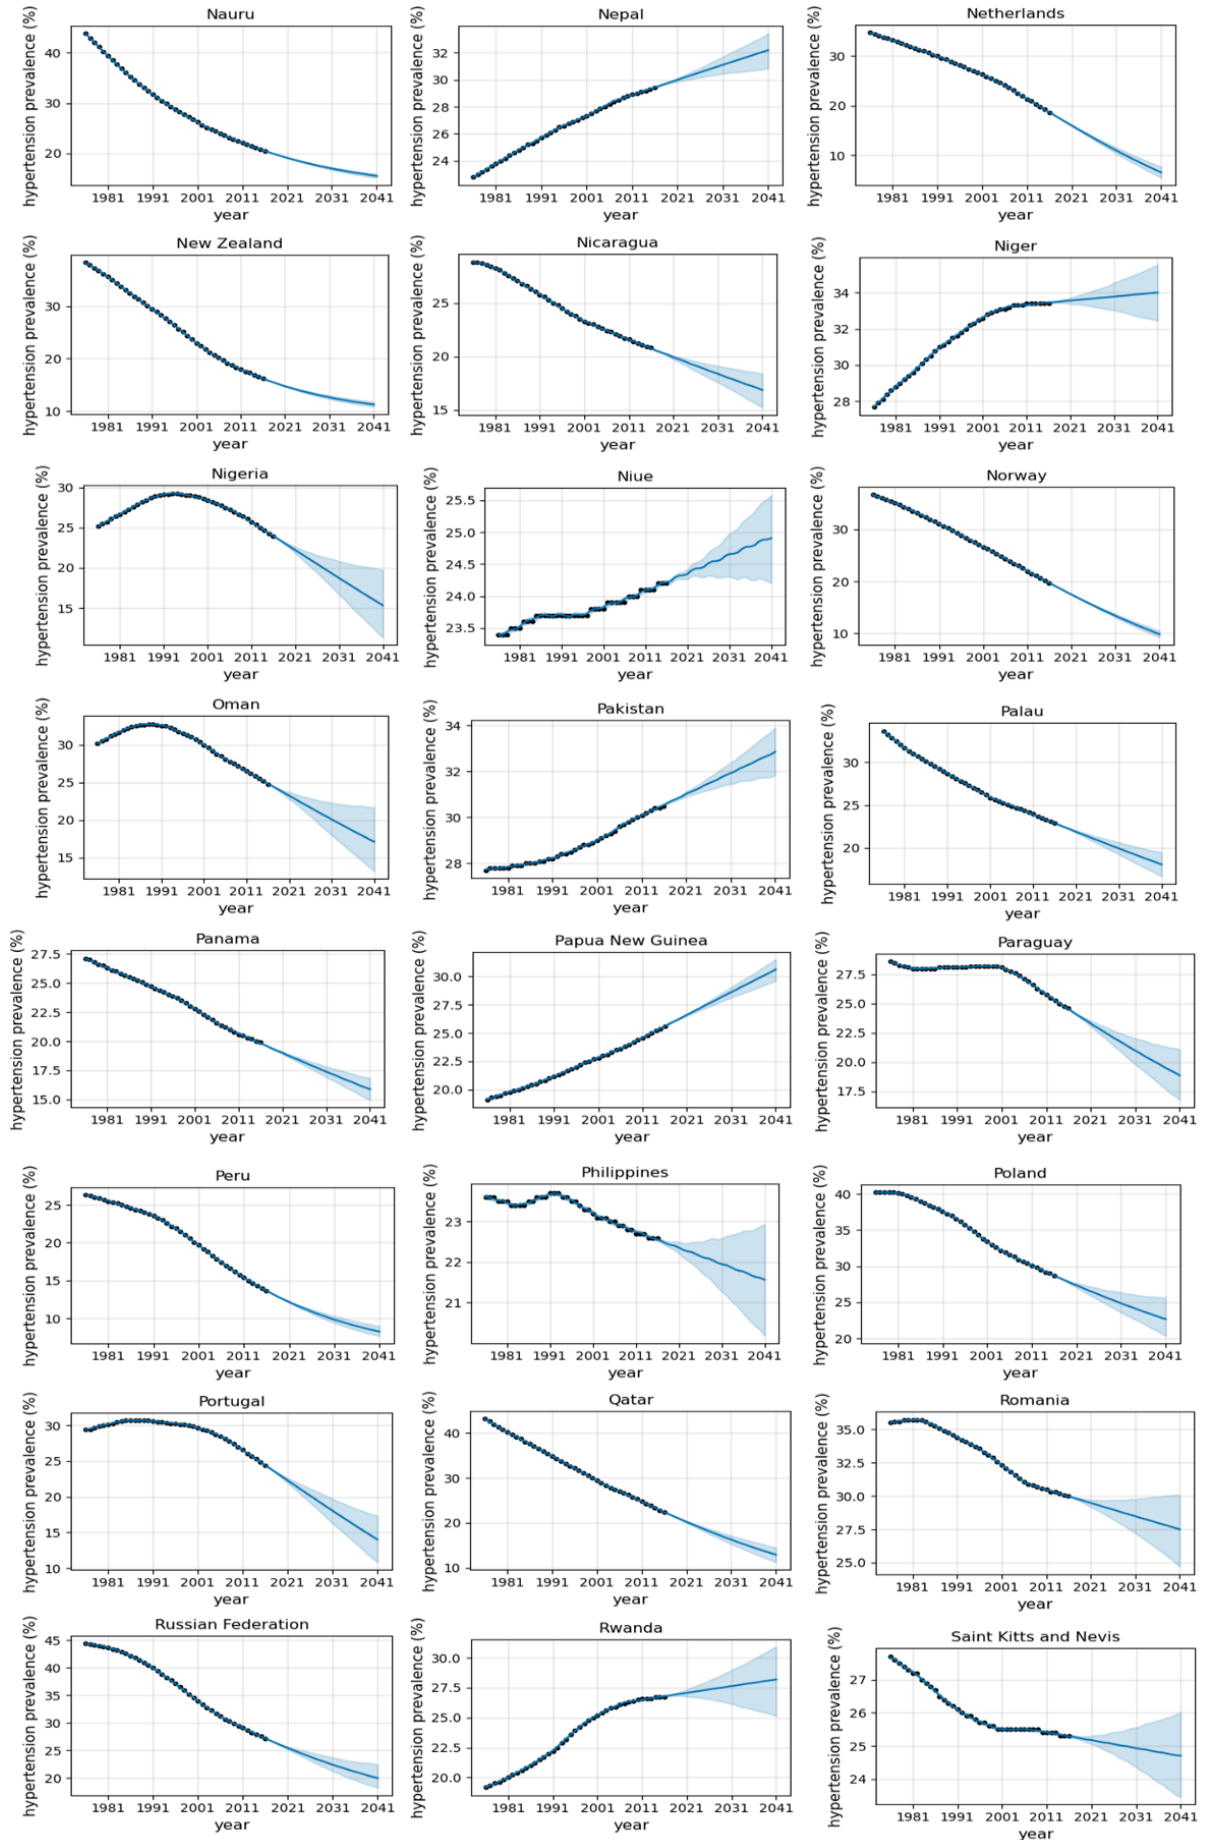

**Fig. A3f.** Plot of actual data (dotted) and fitted curve (95% CI) for hypertension prevalence (Both)

*A glimpse into the future: modelling global prevalence of hypertension*

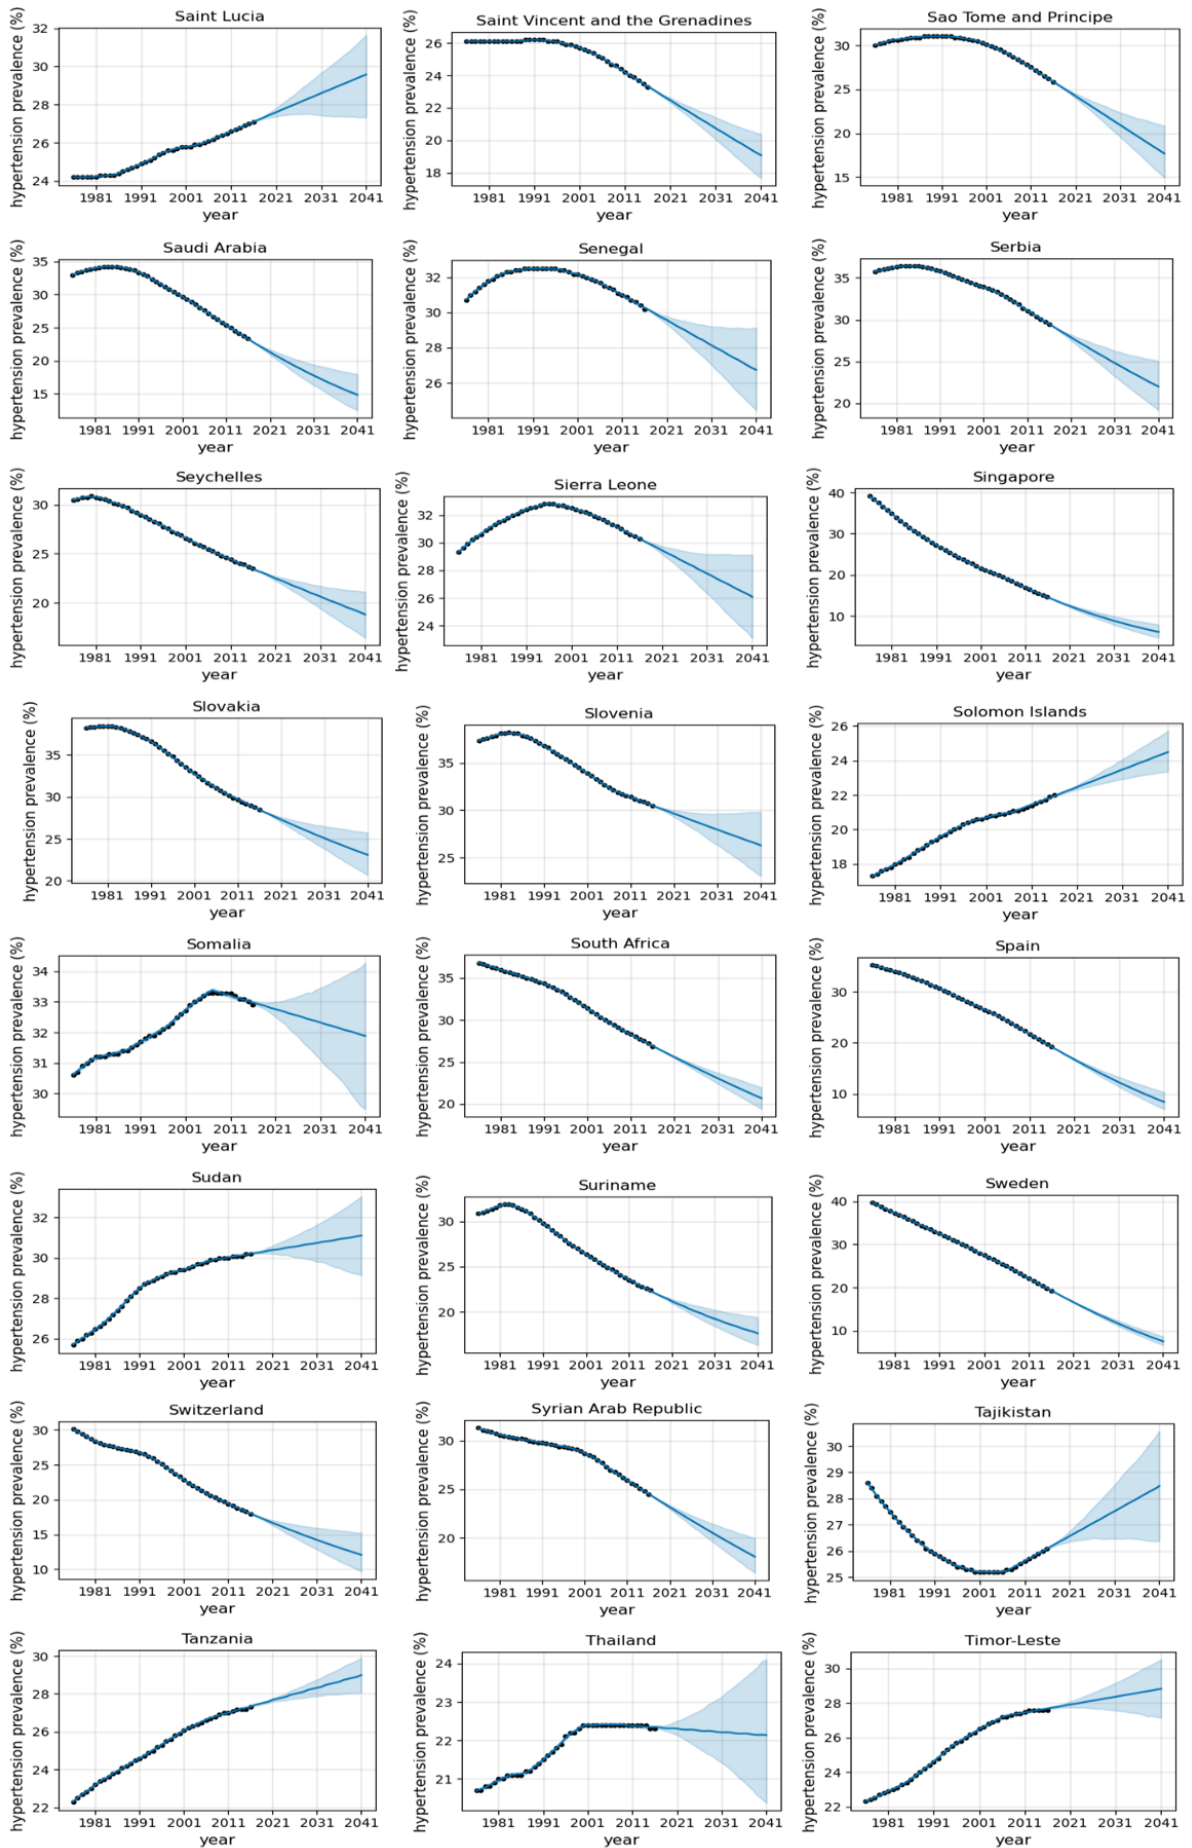

**Fig. A3g.** Plot of actual data (dotted) and fitted curve (95% CI) for hypertension prevalence (Both)

*A glimpse into the future: modelling global prevalence of hypertension*

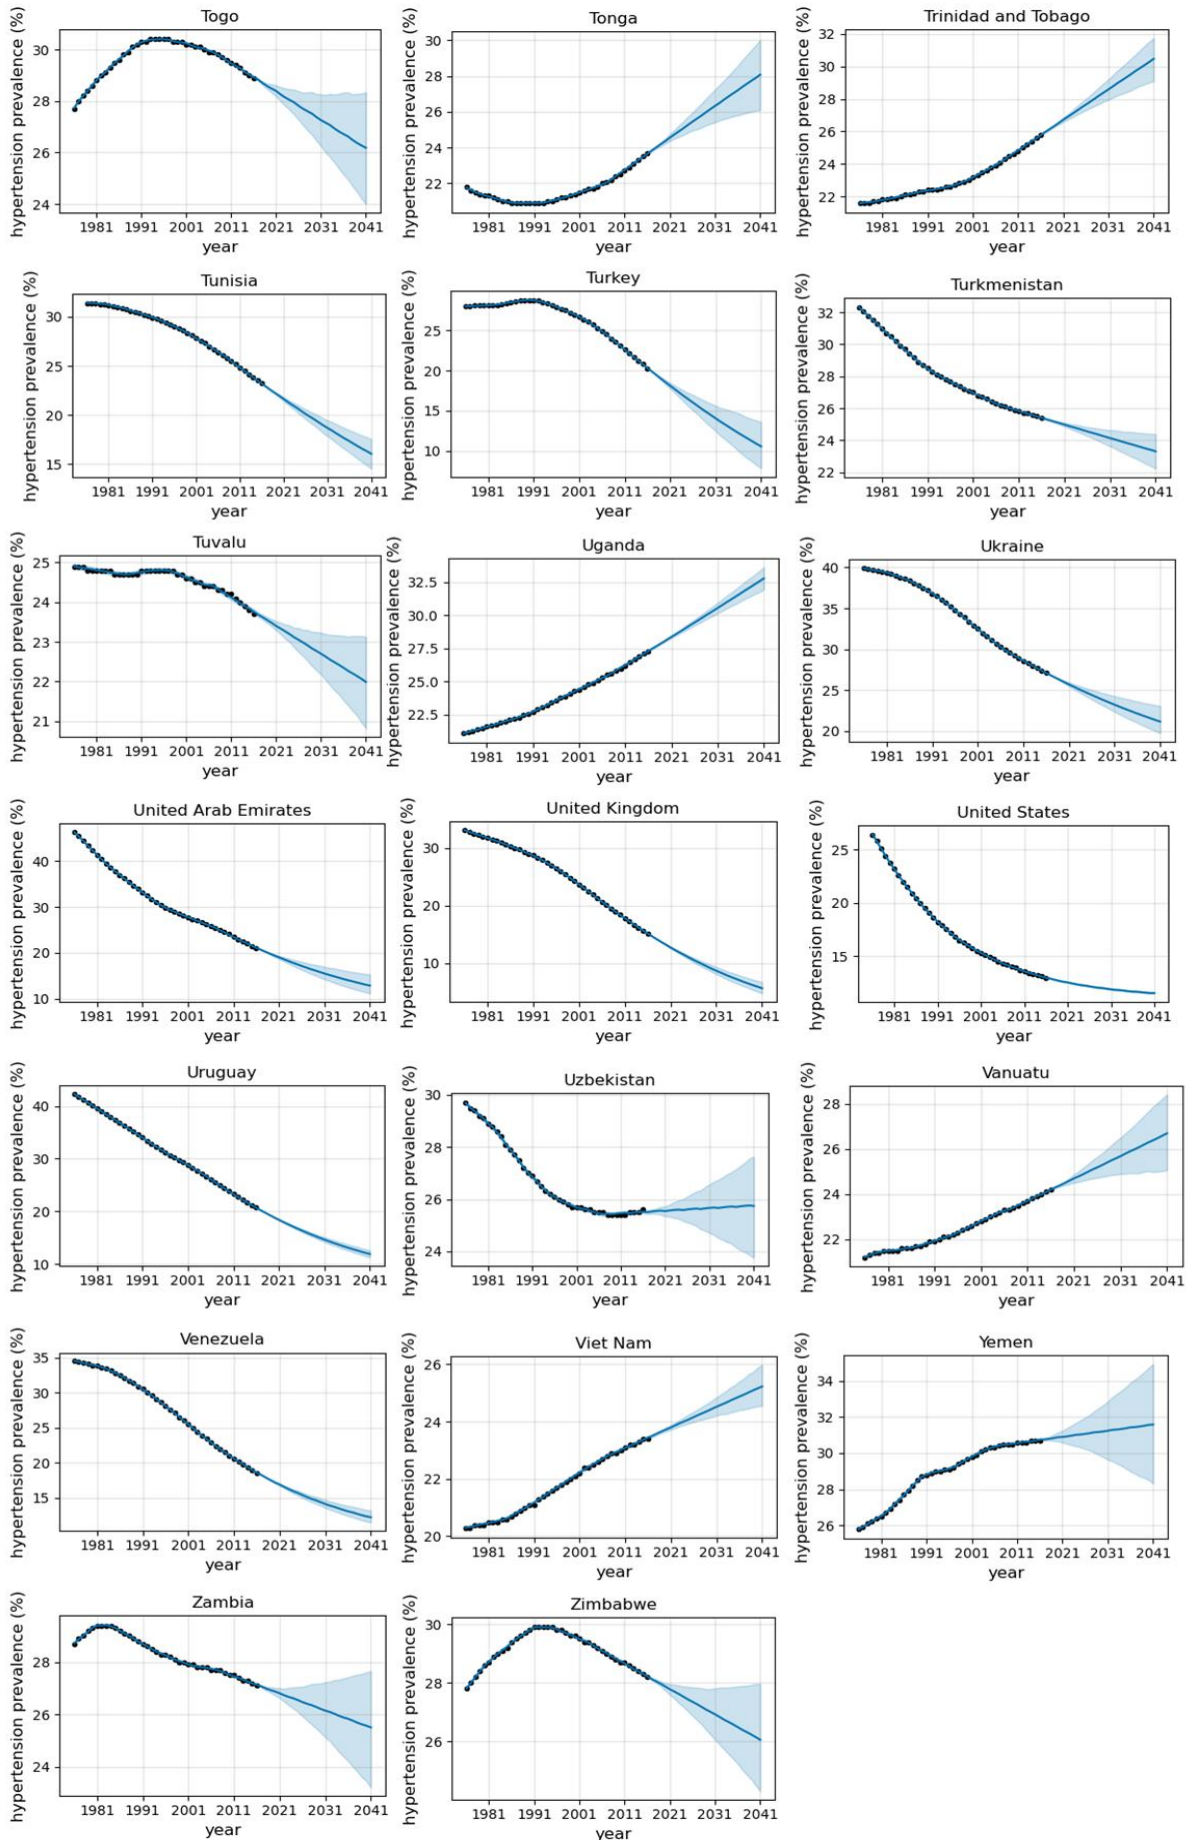

**Fig. A3h.** Plot of actual data (dotted) and fitted curve (95% CI) for hypertension prevalence (Both)

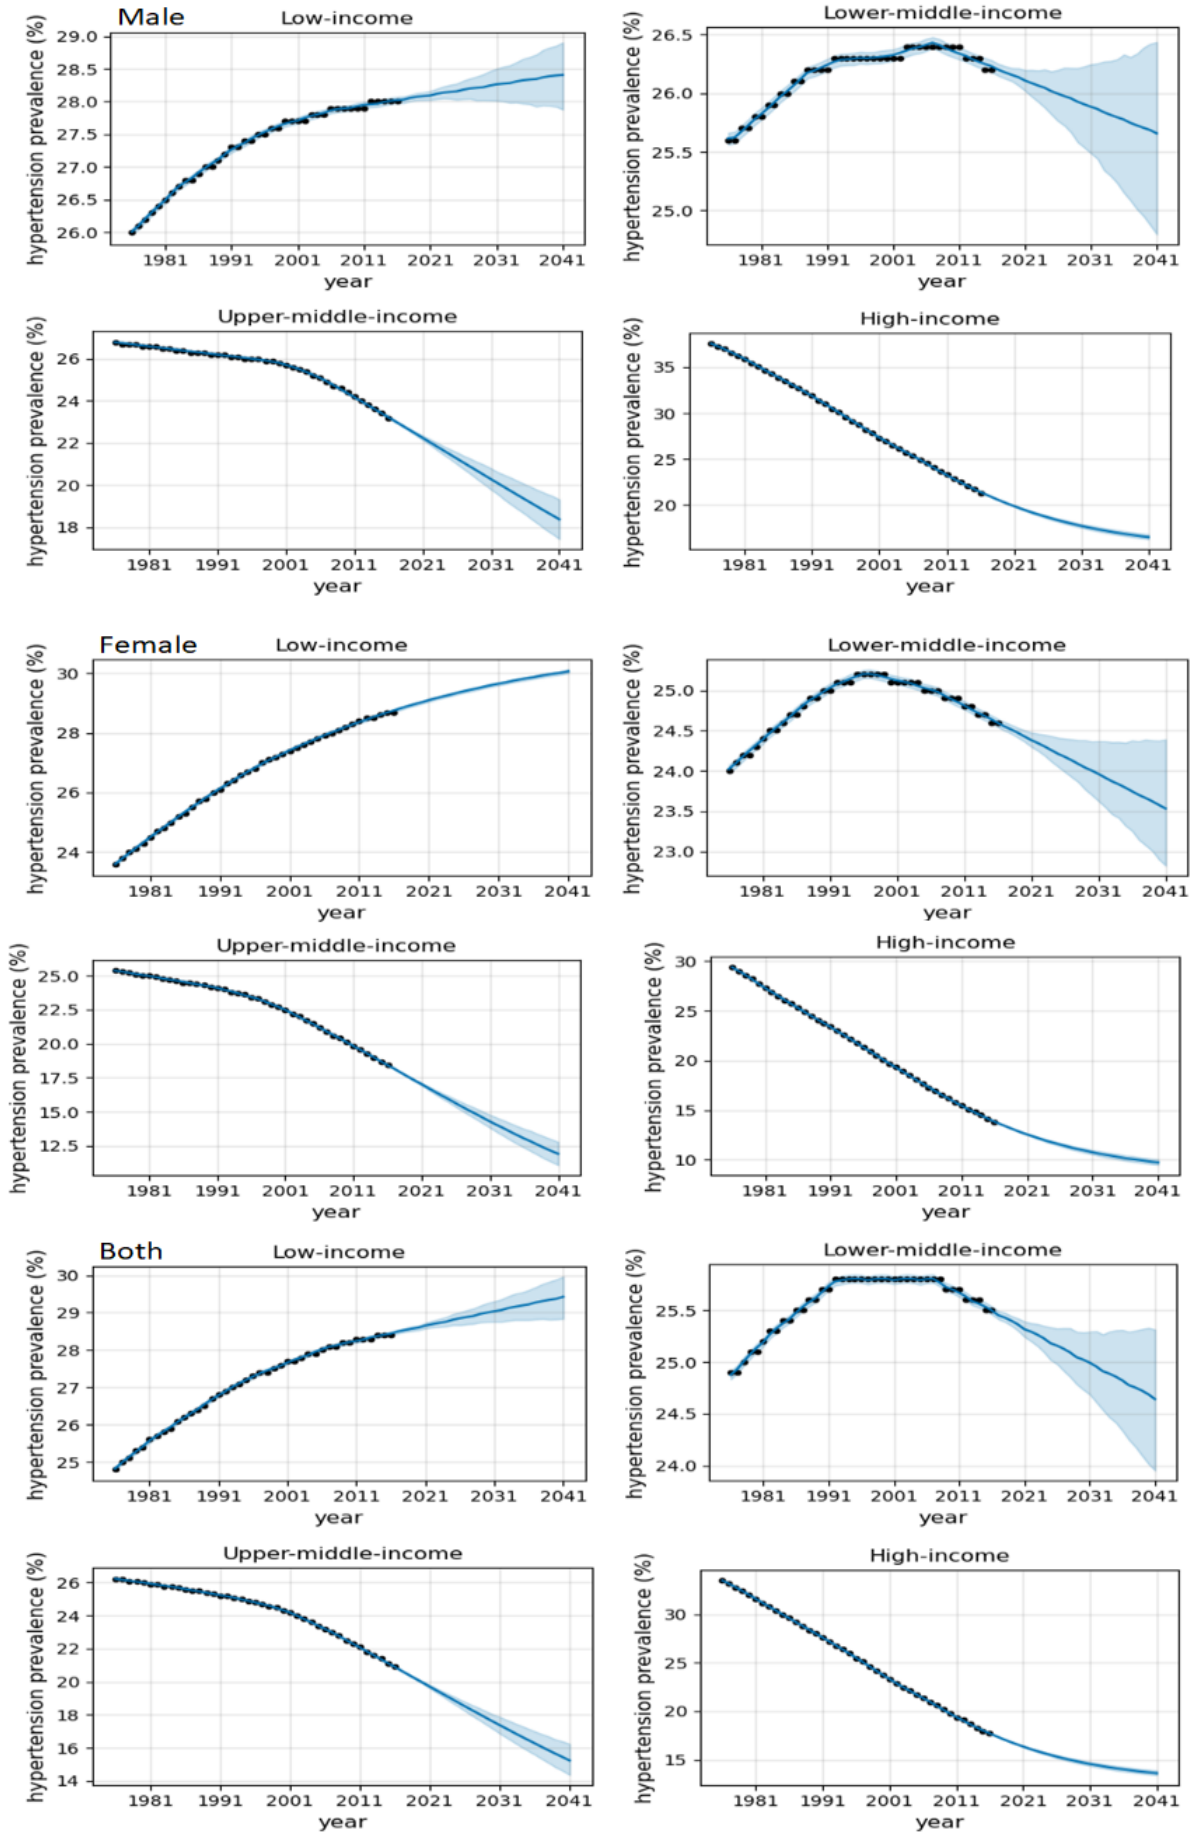

Fig. A4a. Plot of actual data and fitted curve (95% CI) for hypertension prevalence (Income groups)

*A glimpse into the future: modelling global prevalence of hypertension*

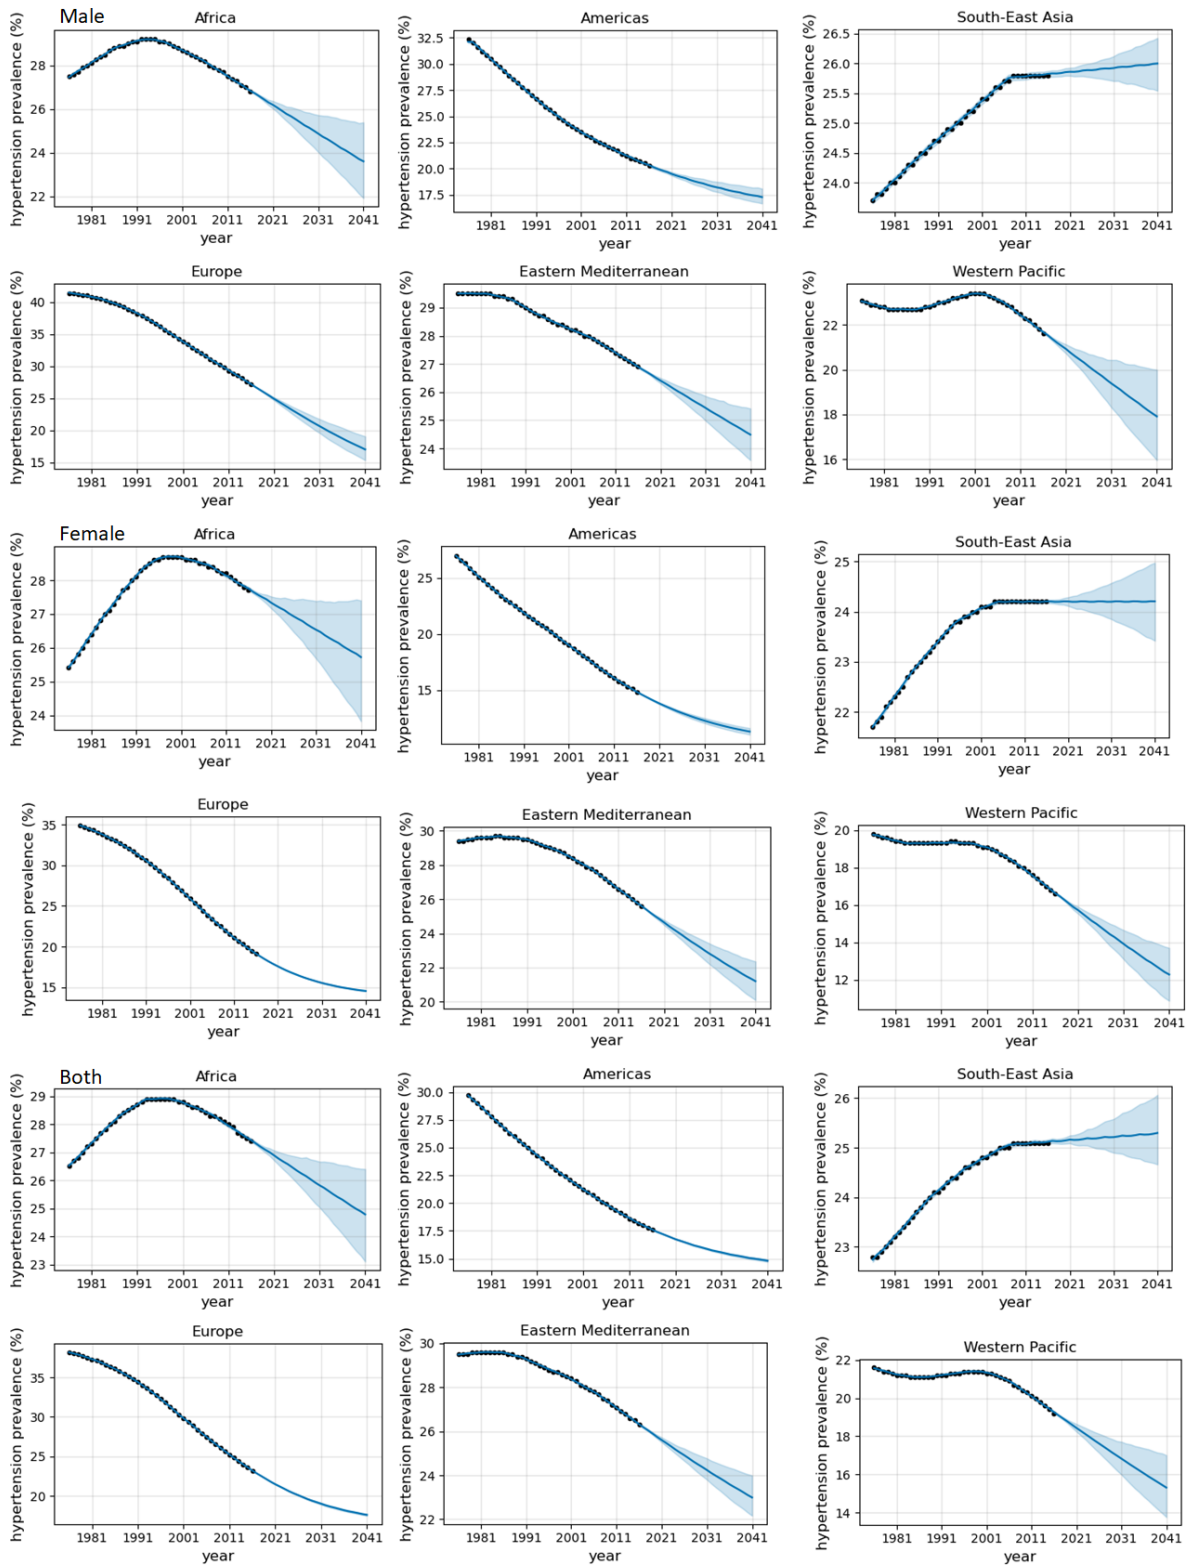

**Fig. A4b.** Plot of actual data and fitted curve (95% CI) for hypertension prevalence (Regions)

**Table A4.** Changes in hypertension prevalence cluster patterns

| No. | Country/territory                     | 2010 | 2015 | 2040 |
|-----|---------------------------------------|------|------|------|
| 1   | Afghanistan                           | 1    | 1    | 1    |
| 2   | Angola                                | 1    | 1    | 1    |
| 3   | Bhutan                                | 2    | 1    | 1    |
| 4   | Bosnia and Herzegovina                | 1    | 1    | 1    |
| 5   | Burkina Faso                          | 1    | 1    | 1    |
| 6   | Burundi                               | 2    | 1    | 1    |
| 7   | Cambodia                              | 2    | 2    | 1    |
| 8   | Central African Republic              | 1    | 1    | 1    |
| 9   | Chad                                  | 1    | 1    | 1    |
| 10  | Comoros                               | 2    | 1    | 1    |
| 11  | Congo, the Democratic Republic of the | 2    | 1    | 1    |
| 12  | Croatia                               | 1    | 1    | 1    |
| 13  | Equatorial Guinea                     | 2    | 1    | 1    |
| 14  | Eritrea                               | 2    | 1    | 1    |
| 15  | Eswatini                              | 2    | 1    | 1    |
| 16  | Ethiopia                              | 2    | 1    | 1    |
| 17  | Guinea                                | 1    | 1    | 1    |
| 18  | Guinea-Bissau                         | 1    | 1    | 1    |
| 19  | India                                 | 2    | 2    | 1    |
| 20  | Kenya                                 | 2    | 2    | 1    |
| 21  | Kyrgyzstan                            | 2    | 2    | 1    |
| 22  | Lesotho                               | 2    | 1    | 1    |
| 23  | Madagascar                            | 2    | 1    | 1    |
| 24  | Malawi                                | 2    | 1    | 1    |
| 25  | Mali                                  | 1    | 1    | 1    |
| 26  | Micronesia                            | 2    | 2    | 1    |
| 27  | Moldova                               | 1    | 1    | 1    |
| 28  | Mozambique                            | 2    | 1    | 1    |
| 29  | Myanmar                               | 2    | 2    | 1    |
| 30  | Nepal                                 | 2    | 1    | 1    |
| 31  | Niger                                 | 1    | 1    | 1    |
| 32  | Pakistan                              | 1    | 1    | 1    |
| 33  | Papua New Guinea                      | 2    | 2    | 1    |
| 34  | Romania                               | 1    | 1    | 1    |
| 35  | Rwanda                                | 2    | 2    | 1    |
| 36  | Saint Lucia                           | 2    | 1    | 1    |
| 37  | Senegal                               | 1    | 1    | 1    |
| 38  | Sierra Leone                          | 1    | 1    | 1    |
| 39  | South Africa                          | 2    | 2    | 1    |
| 40  | Sudan                                 | 1    | 1    | 1    |
| 41  | Tajikistan                            | 2    | 2    | 1    |
| 42  | Tanzania                              | 2    | 2    | 1    |
| 43  | Timor-Leste                           | 2    | 1    | 1    |
| 44  | Togo                                  | 2    | 1    | 1    |
| 45  | Trinidad and Tobago                   | 2    | 2    | 1    |
| 46  | Uganda                                | 2    | 1    | 1    |
| 47  | Vanuatu                               | 2    | 2    | 1    |

| No. | Country/territory                | 2010 | 2015 | 2040 |
|-----|----------------------------------|------|------|------|
| 48  | Yemen                            | 1    | 1    | 1    |
| 49  | Zimbabwe                         | 2    | 1    | 1    |
| 50  | Albania                          | 1    | 1    | 2    |
| 51  | Antigua and Barbuda              | 3    | 2    | 2    |
| 52  | Argentina                        | 3    | 2    | 2    |
| 53  | Armenia                          | 2    | 2    | 2    |
| 54  | Azerbaijan                       | 2    | 2    | 2    |
| 55  | Bangladesh                       | 2    | 2    | 2    |
| 56  | Barbados                         | 2    | 2    | 2    |
| 57  | Belarus                          | 1    | 1    | 2    |
| 58  | Belize                           | 3    | 2    | 2    |
| 59  | Benin                            | 2    | 1    | 2    |
| 60  | Botswana                         | 1    | 1    | 2    |
| 61  | Bulgaria                         | 1    | 1    | 2    |
| 62  | Cabo Verde                       | 1    | 1    | 2    |
| 63  | Congo                            | 2    | 2    | 2    |
| 64  | Cook Islands                     | 3    | 2    | 2    |
| 65  | Cote D'ivoire                    | 2    | 1    | 2    |
| 66  | Czechia                          | 1    | 1    | 2    |
| 67  | Djibouti                         | 2    | 1    | 2    |
| 68  | Egypt                            | 2    | 2    | 2    |
| 69  | Estonia                          | 1    | 1    | 2    |
| 70  | Fiji                             | 3    | 2    | 2    |
| 71  | Gambia                           | 1    | 1    | 2    |
| 72  | Grenada                          | 3    | 2    | 2    |
| 73  | Guatemala                        | 3    | 3    | 2    |
| 74  | Haiti                            | 2    | 2    | 2    |
| 75  | Honduras                         | 3    | 2    | 2    |
| 76  | Hungary                          | 1    | 1    | 2    |
| 77  | Indonesia                        | 2    | 2    | 2    |
| 78  | Iraq                             | 2    | 2    | 2    |
| 79  | Jamaica                          | 3    | 2    | 2    |
| 80  | Kazakhstan                       | 2    | 1    | 2    |
| 81  | Lao People's Democratic Republic | 2    | 2    | 2    |
| 82  | Liberia                          | 2    | 1    | 2    |
| 83  | Lithuania                        | 1    | 1    | 2    |
| 84  | Macedonia                        | 1    | 1    | 2    |
| 85  | Maldives                         | 2    | 2    | 2    |
| 86  | Marshall Islands                 | 3    | 3    | 2    |
| 87  | Mauritania                       | 1    | 1    | 2    |
| 88  | Mauritius                        | 2    | 2    | 2    |
| 89  | Mongolia                         | 1    | 1    | 2    |
| 90  | Montenegro                       | 1    | 1    | 2    |
| 91  | Morocco                          | 2    | 2    | 2    |
| 92  | Namibia                          | 2    | 1    | 2    |
| 93  | Niue                             | 3    | 2    | 2    |
| 94  | Palau                            | 3    | 2    | 2    |
| 95  | Philippines                      | 3    | 2    | 2    |

| No. | Country/territory                | 2010 | 2015 | 2040 |
|-----|----------------------------------|------|------|------|
| 96  | Poland                           | 1    | 1    | 2    |
| 97  | Russian Federation               | 1    | 1    | 2    |
| 98  | Saint Kitts and Nevis            | 2    | 2    | 2    |
| 99  | Saint Vincent and the Grenadines | 3    | 2    | 2    |
| 100 | Serbia                           | 1    | 1    | 2    |
| 101 | Seychelles                       | 3    | 2    | 2    |
| 102 | Slovakia                         | 1    | 1    | 2    |
| 103 | Slovenia                         | 1    | 1    | 2    |
| 104 | Solomon Islands                  | 3    | 2    | 2    |
| 105 | Somalia                          | 1    | 1    | 2    |
| 106 | Sri Lanka                        | 3    | 2    | 2    |
| 107 | Syrian Arab Republic             | 2    | 2    | 2    |
| 108 | Thailand                         | 3    | 2    | 2    |
| 109 | Turkmenistan                     | 2    | 2    | 2    |
| 110 | Tuvalu                           | 3    | 2    | 2    |
| 111 | Ukraine                          | 1    | 1    | 2    |
| 112 | Uzbekistan                       | 2    | 2    | 2    |
| 113 | Viet Nam                         | 3    | 2    | 2    |
| 114 | Algeria                          | 2    | 2    | 3    |
| 115 | Andorra                          | 3    | 3    | 3    |
| 116 | Australia                        | 3    | 3    | 3    |
| 117 | Austria                          | 3    | 3    | 3    |
| 118 | Bahamas                          | 3    | 3    | 3    |
| 119 | Bahrain                          | 3    | 3    | 3    |
| 120 | Belgium                          | 3    | 3    | 3    |
| 121 | Bolivia                          | 3    | 3    | 3    |
| 122 | Brazil                           | 2    | 2    | 3    |
| 123 | Brunei Darussalam                | 3    | 3    | 3    |
| 124 | Cameroon                         | 2    | 2    | 3    |
| 125 | Canada                           | 3    | 3    | 3    |
| 126 | Chile                            | 3    | 3    | 3    |
| 127 | Colombia                         | 3    | 3    | 3    |
| 128 | Costa Rica                       | 3    | 3    | 3    |
| 129 | Cuba                             | 3    | 3    | 3    |
| 130 | Cyprus                           | 3    | 3    | 3    |
| 131 | Denmark                          | 3    | 3    | 3    |
| 132 | Dominica                         | 3    | 2    | 3    |
| 133 | Dominican Republic               | 3    | 3    | 3    |
| 134 | Ecuador                          | 3    | 3    | 3    |
| 135 | El Salvador                      | 3    | 3    | 3    |
| 136 | Finland                          | 3    | 3    | 3    |
| 137 | France                           | 3    | 2    | 3    |
| 138 | Germany                          | 3    | 3    | 3    |
| 139 | Ghana                            | 2    | 2    | 3    |
| 140 | Greece                           | 3    | 3    | 3    |
| 141 | Iceland                          | 3    | 3    | 3    |
| 142 | Iran (Islamic Republic of)       | 3    | 3    | 3    |
| 143 | Ireland                          | 3    | 3    | 3    |



| No. | Country/territory     | 2010 | 2015 | 2040 |
|-----|-----------------------|------|------|------|
| 144 | Israel                | 3    | 3    | 3    |
| 145 | Italy                 | 3    | 3    | 3    |
| 146 | Japan                 | 3    | 3    | 3    |
| 147 | Jordan                | 3    | 3    | 3    |
| 148 | Korea (North)         | 3    | 3    | 3    |
| 149 | Kuwait                | 2    | 2    | 3    |
| 150 | Libya                 | 2    | 2    | 3    |
| 151 | Luxembourg            | 3    | 3    | 3    |
| 152 | Malaysia              | 2    | 2    | 3    |
| 153 | Malta                 | 3    | 3    | 3    |
| 154 | Mexico                | 3    | 3    | 3    |
| 155 | Nauru                 | 3    | 3    | 3    |
| 156 | Netherlands           | 3    | 3    | 3    |
| 157 | New Zealand           | 3    | 3    | 3    |
| 158 | Nicaragua             | 3    | 3    | 3    |
| 159 | Nigeria               | 2    | 2    | 3    |
| 160 | Norway                | 3    | 3    | 3    |
| 161 | Panama                | 3    | 3    | 3    |
| 162 | Peru                  | 3    | 3    | 3    |
| 163 | Portugal              | 2    | 2    | 3    |
| 164 | Qatar                 | 3    | 3    | 3    |
| 165 | Sao Tome and Principe | 2    | 2    | 3    |
| 166 | Singapore             | 3    | 3    | 3    |
| 167 | Spain                 | 3    | 3    | 3    |
| 168 | Suriname              | 3    | 2    | 3    |
| 169 | Sweden                | 3    | 3    | 3    |
| 170 | Switzerland           | 3    | 3    | 3    |
| 171 | Tunisia               | 2    | 2    | 3    |
| 172 | Turkey                | 3    | 3    | 3    |
| 173 | United Kingdom        | 3    | 3    | 3    |
| 174 | United States         | 3    | 3    | 3    |
| 175 | Uruguay               | 3    | 3    | 3    |
| 176 | Venezuela             | 3    | 3    | 3    |
